# Supplementary material for: Mediator or moderator? The role of obesity in the association between age at menarche and blood pressure in middle-aged and elderly Chinese: a population-based cross-sectional study
Source: PubMed Central journal article supplement (PMC9137347; doi:10.1136/bmjopen-2021-051486), 2022-05-25
Supplement: bmjopen-2021-051486.draft_revisions.pdf [file bmjopen-2021-051486.draft_revisions.pdf]

# BMJ Open

BMJ Open is committed to open peer review. As part of this commitment we make the peer review history of every article we publish publicly available.

When an article is published we post the peer reviewers' comments and the authors' responses online. We also post the versions of the paper that were used during peer review. These are the versions that the peer review comments apply to.

The versions of the paper that follow are the versions that were submitted during the peer review process. They are not the versions of record or the final published versions. They should not be cited or distributed as the published version of this manuscript.

BMJ Open is an open access journal and the full, final, typeset and author-corrected version of record of the manuscript is available on our site with no access controls, subscription charges or pay-per-view fees (<http://bmjopen.bmj.com>).

If you have any questions on BMJ Open's open peer review process please email [info.bmjopen@bmj.com](mailto:info.bmjopen@bmj.com)

# BMJ Open

## Association between age at menarche and blood pressure in mid-aged and elderly Chinese: is obesity an important mediator or moderator?

|                               |                                                                                                                                                                                                                                                                                                                                                                                                                                                                                                                                                                                                                                                                                                                                                                                                                                                                                                                                                                                                                                                                                                                                                                                                                                                                                                                                                                                                                                                                                                                                                                                                                                                                                                                                                                                                                                                                                                                                                                                                                                                                                                                                                                                                                                                                                                                                                                                                                                                                                                                                                                                            |
|-------------------------------|--------------------------------------------------------------------------------------------------------------------------------------------------------------------------------------------------------------------------------------------------------------------------------------------------------------------------------------------------------------------------------------------------------------------------------------------------------------------------------------------------------------------------------------------------------------------------------------------------------------------------------------------------------------------------------------------------------------------------------------------------------------------------------------------------------------------------------------------------------------------------------------------------------------------------------------------------------------------------------------------------------------------------------------------------------------------------------------------------------------------------------------------------------------------------------------------------------------------------------------------------------------------------------------------------------------------------------------------------------------------------------------------------------------------------------------------------------------------------------------------------------------------------------------------------------------------------------------------------------------------------------------------------------------------------------------------------------------------------------------------------------------------------------------------------------------------------------------------------------------------------------------------------------------------------------------------------------------------------------------------------------------------------------------------------------------------------------------------------------------------------------------------------------------------------------------------------------------------------------------------------------------------------------------------------------------------------------------------------------------------------------------------------------------------------------------------------------------------------------------------------------------------------------------------------------------------------------------------|
| Journal:                      | <i>BMJ Open</i>                                                                                                                                                                                                                                                                                                                                                                                                                                                                                                                                                                                                                                                                                                                                                                                                                                                                                                                                                                                                                                                                                                                                                                                                                                                                                                                                                                                                                                                                                                                                                                                                                                                                                                                                                                                                                                                                                                                                                                                                                                                                                                                                                                                                                                                                                                                                                                                                                                                                                                                                                                            |
| Manuscript ID                 | bmjopen-2021-051486                                                                                                                                                                                                                                                                                                                                                                                                                                                                                                                                                                                                                                                                                                                                                                                                                                                                                                                                                                                                                                                                                                                                                                                                                                                                                                                                                                                                                                                                                                                                                                                                                                                                                                                                                                                                                                                                                                                                                                                                                                                                                                                                                                                                                                                                                                                                                                                                                                                                                                                                                                        |
| Article Type:                 | Original research                                                                                                                                                                                                                                                                                                                                                                                                                                                                                                                                                                                                                                                                                                                                                                                                                                                                                                                                                                                                                                                                                                                                                                                                                                                                                                                                                                                                                                                                                                                                                                                                                                                                                                                                                                                                                                                                                                                                                                                                                                                                                                                                                                                                                                                                                                                                                                                                                                                                                                                                                                          |
| Date Submitted by the Author: | 21-Mar-2021                                                                                                                                                                                                                                                                                                                                                                                                                                                                                                                                                                                                                                                                                                                                                                                                                                                                                                                                                                                                                                                                                                                                                                                                                                                                                                                                                                                                                                                                                                                                                                                                                                                                                                                                                                                                                                                                                                                                                                                                                                                                                                                                                                                                                                                                                                                                                                                                                                                                                                                                                                                |
| Complete List of Authors:     | <p>zhang, lin; Wannan Medical College, Department of Internal Medicine Nursing, School of Nursing, Wannan Medical College, 22 Wenchang West Road, Higher Education Park, Wuhu City, An Hui Province, P.R.China</p> <p>Yang, Liu; Department of Internal Medicine Nursing, School of Nursing, Wannan Medical College, 22 Wenchang West Road, Higher Education Park, Wuhu City, An Hui Province, P.R.China</p> <p>Wang, Congzhi; Wannan Medical College, Department of Internal Medicine Nursing, School of Nursing, Wannan Medical College, 22 Wenchang West Road, Higher Education Park, Wuhu City, An Hui Province, P.R.China</p> <p>Yuan, Ting; Wannan Medical College, Obstetrics and Gynecology Nursing, School of Nursing, Wannan Medical College, 22 Wenchang West Road, Higher Education Park, Wuhu City, An Hui Province, P.R.China</p> <p>Zhang, Dongmei; Wannan Medical College, Department of Pediatric Nursing, School of Nursing, Wannan Medical College, 22 Wenchang West Road, Higher Education Park, Wuhu City, An Hui Province, P.R.China</p> <p>Wei, Huanhuan; Wannan Medical College, Obstetrics and Gynecology Nursing, School of Nursing, Wannan Medical College, 22 Wenchang West Road, Higher Education Park, Wuhu City, An Hui Province, P.R.China</p> <p>Li, Jing; Wannan Medical College, Department of Surgical Nursing, School of Nursing, Wannan Medical College, 22 Wenchang West Road, Higher Education Park, Wuhu City, An Hui Province, P.R.China</p> <p>Lei, Yunxiao; Wannan Medical College, Obstetrics and Gynecology Nursing, School of Nursing, Wannan Medical College, 22 Wenchang West Road, Higher Education Park, Wuhu City, An Hui Province, P.R.China;</p> <p>Henan University of Science and Technology, School of Nursing</p> <p>Sun, Lu; Wannan Medical College, Department of Emergency and Critical Care Nursing, School of Nursing, Wannan Medical College, 22 Wenchang West Road, Higher Education Park, Wuhu City, An Hui Province, P.R.China</p> <p>Li, Xiaoping; Wannan Medical College, Department of Emergency and Critical Care Nursing, School of Nursing, Wannan Medical College, 22 Wenchang West Road, Higher Education Park, Wuhu City, An Hui Province, P.R.China</p> <p>Hua, Ying; Wannan Medical College, Rehabilitation Nursing, School of Nursing, Wannan Medical College, 22 Wenchang West Road, Higher Education Park, Wuhu City, An Hui Province, P.R.China</p> <p>Che, Hengying; Yijishan Hospital of Wannan Medical College, Department of nursing, Yijishan Hospital, the First Affiliated Hospital of Wannan</p> |

1  
2  
3  
4  
5  
6  
7  
8  
9  
10  
11  
12  
13  
14  
15  
16  
17  
18  
19  
20  
21  
22  
23  
24  
25  
26  
27  
28  
29  
30  
31  
32  
33  
34  
35  
36  
37  
38  
39  
40  
41  
42  
43  
44  
45  
46  
47  
48  
49  
50  
51  
52  
53  
54  
55  
56  
57  
58  
59  
60

|           |                                                                                                                                                                                                                                                                                                             |
|-----------|-------------------------------------------------------------------------------------------------------------------------------------------------------------------------------------------------------------------------------------------------------------------------------------------------------------|
|           | Medical College, Zheshan West Road, Yijishan District, Wuhu City, Anhui Province<br>Li, Yuanzhen; Wannan Medical College, Department of Emergency and Critical Care Nursing, School of Nursing, Wannan Medical College, 22 Wenchang West Road, Higher Education Park, Wuhu City, An Hui Province, P.R.China |
| Keywords: | Hypertension < CARDIOLOGY, Risk management < HEALTH SERVICES ADMINISTRATION & MANAGEMENT, Nutrition < TROPICAL MEDICINE                                                                                                                                                                                     |
|           |                                                                                                                                                                                                                                                                                                             |

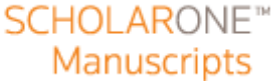

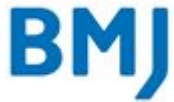

I, the Submitting Author has the right to grant and does grant on behalf of all authors of the Work (as defined in the below author licence), an exclusive licence and/or a non-exclusive licence for contributions from authors who are: i) UK Crown employees; ii) where BMJ has agreed a CC-BY licence shall apply, and/or iii) in accordance with the terms applicable for US Federal Government officers or employees acting as part of their official duties; on a worldwide, perpetual, irrevocable, royalty-free basis to BMJ Publishing Group Ltd ("BMJ") its licensees and where the relevant Journal is co-owned by BMJ to the co-owners of the Journal, to publish the Work in this journal and any other BMJ products and to exploit all rights, as set out in our [licence](#).

The Submitting Author accepts and understands that any supply made under these terms is made by BMJ to the Submitting Author unless you are acting as an employee on behalf of your employer or a postgraduate student of an affiliated institution which is paying any applicable article publishing charge ("APC") for Open Access articles. Where the Submitting Author wishes to make the Work available on an Open Access basis (and intends to pay the relevant APC), the terms of reuse of such Open Access shall be governed by a Creative Commons licence – details of these licences and which [Creative Commons](#) licence will apply to this Work are set out in our licence referred to above.

Other than as permitted in any relevant BMJ Author's Self Archiving Policies, I confirm this Work has not been accepted for publication elsewhere, is not being considered for publication elsewhere and does not duplicate material already published. I confirm all authors consent to publication of this Work and authorise the granting of this licence.

**Association between age at menarche and blood pressure in mid-aged and elderly Chinese: is obesity an important mediator or moderator?**

Lin Zhang<sup>1</sup>, Liu Yang<sup>1</sup>, Congzhi Wang<sup>1</sup>, Ting Yuan<sup>2</sup>, Dongmei Zhang<sup>3</sup>, Huanhuan Wei<sup>2</sup>, Jing Li<sup>4</sup>, Yunxiao Lei<sup>2</sup>, Lu Sun<sup>5</sup>, Xiaoping Li<sup>5</sup>, Ying Hua<sup>6</sup>, Hengying Che<sup>7\*</sup>, Yuanzhen Li<sup>5\*</sup>

\*Correspondence: Hengying Che: 2722659079@qq.com and Yuanzhen Li: yuanzhen.li@wnmc.edu.cn

Yuanzhen Li and Hengying Che contributed equally to this work.

Lin Zhang: yaoran2008@163.com

Liu Yang: zqzqylyl5858@163.com

Congzhi Wang: 289957420@qq.com

Ting Yuan: yuanting@wnmc.edu.cn

Dongmei Zhang: dongmei.0715@163.com

Huanhuan Wei: whh0702@163.com

Jing Li: 475366616@qq.com

Yunxiao Lei: lyxheart@163.com

Lu Sun: 565196200@qq.com

Xiaoping Li: 349274808@qq.com

Ying Hua: 1542997737@qq.com

Hengying Che: 2722659079@qq.com

Yuanzhen Li: yuanzhen.li@wnmc.edu.cn

<sup>1</sup> Department of Internal Medicine Nursing, School of Nursing, Wannan Medical College, 22 Wenchang West Road, Higher Education Park, Wuhu City, An Hui Province, P.R.China

<sup>2</sup> Obstetrics and Gynecology Nursing, School of Nursing, Wannan Medical College, 22 Wenchang West Road, Higher Education Park, Wuhu City, An Hui Province, P.R.China

<sup>3</sup> Department of Pediatric Nursing, School of Nursing, Wannan Medical College, 22 Wenchang West Road, Higher Education Park, Wuhu City, An Hui Province, P.R.China

<sup>4</sup> Department of Surgical Nursing, School of Nursing, Wannan Medical College, 22 Wenchang West Road, Higher Education Park, Wuhu City, An Hui Province, P.R.China

<sup>5</sup> Department of Emergency and Critical Care Nursing, School of Nursing, Wannan Medical College, 22 Wenchang West Road, Higher Education Park, Wuhu City, An Hui Province, P.R.China

<sup>6</sup> Rehabilitation Nursing, School of Nursing, Wannan Medical College, 22 Wenchang West Road, Higher Education Park, Wuhu City, An Hui Province, P.R.China

<sup>7</sup> Department of nursing, Yijishan Hospital, the First Affiliated Hospital of Wannan Medical College, Zheshan West Road, Yijishan District, Wuhu City, Anhui Province

## ABSTRACT

**Objective** We investigated the moderation/mediation between the age of menarche and obesity parameters in predicting blood pressure (BP) in middle-aged and elderly Chinese.

**Design** Cross-sectional study.

**Setting** Data were selected from the China Health and Retirement Longitudinal Study.

**Participants** The analytic sample included 4513 Individuals aged 45 to 96.

**Main outcome measurements** Data were selected from the China Health and Retirement Longitudinal Study (CHARLS), a cross-sectional study. Differences between baseline characteristics were evaluated using a t-test. The trend of related variables by baseline characteristics was also tested using contrast analysis, as appropriate. Then, correlations between baseline characteristics, independent, moderators, mediators and dependent variables were used by Spearman's correlation test and Pearson's correlation test. Finally, the mediation analysis was performed by model 4 in process v3.3, and the moderation analysis was used model 1 to assessment. All covariates were adjusted in the moderation or mediation models.

**Results** In correlation analysis, BMI and WC levels were positively correlated with both SBP and DBP in women. age of menarche was negatively correlated with DBP. However, the age of menarche was not significantly correlated with SBP. In the moderator analysis, after controlling for the total potential confounders, the interaction term of obesity parameters\*age of menarche was not significant for predicting either DBP or SBP. All correlations were significant correlation between age of menarche, obesity parameters and BP except the path of the menarche age →BP (with the addition of the BMI or WC indicator) in model one. In general, after controlling for potential confounders. WC and BMI partly mediated the relationship between age of menarche and BP.

**Conclusion** The interaction term of obesity parameters\*age of menarche was not significant for predicting either DBP or SBP in women. Moreover, obesity parameters partly mediated the relationship between age of menarche and BP.

**Keywords** age at menarche, blood pressure, body mass index, moderator, mediator, obesity parameters, waist circle

### Strengths and limitations of the study

This is the first large population study to examine the moderation between the age of menarche and obesity parameters in predicting blood pressure (BP) in middle-aged and elderly Chinese, as

1 well as the mediation effects of obesity parameters on the relationship between age of menarche  
2 and BP.  
3  
4

5 This study included a large sample of 4513 middle-aged and older Chinese. The results provided  
6 baseline data that could be explored further in future prospective studies.  
7  
8

9 The main limitations of our research are related to the cross-sectional study and the self-reported  
10 method used for the assessment of age at menarche and most related confounders.  
11  
12  
13  
14  
15  
16  
17  
18  
19  
20  
21  
22  
23  
24  
25  
26  
27  
28  
29  
30  
31  
32  
33  
34  
35  
36  
37  
38  
39  
40  
41  
42  
43  
44  
45  
46  
47  
48  
49  
50  
51  
52  
53  
54  
55  
56  
57  
58  
59  
60

For peer review only

## INTRODUCTION

Blood pressure is the force of circulating blood against the walls of the body's arteries, the major blood vessels in the body. Hypertension is diagnosed if blood pressure readings are 140/90 or above on two different days. As a chronic disease[1], hypertension or elevated blood pressure (BP) is a severe medical condition that significantly increases stroke, heart attack, blindness, Kidney failure, and other complications. Hypertension risk factors[2-6] include stress, harmful use of alcohol, salt consumption, low intake of fruits and vegetables, being overweight or obese, saturated fat and trans fats, tobacco use, low diet in vitamin D, lack of physical activity, family history, aged 65 years or over and co-existing diseases. The World Health Organization(WHO) said[7] an estimated 1.13 billion people worldwide have hypertension and most (two-thirds) living in low- and middle-income countries. It means that most people have high blood pressure. Compared to the global average, people in low- and middle-income countries may bear a disproportionate and heavier burden of the disease, owing to several factors such as the ongoing nutritional transition in dietary consumption and energy expenditure, increasing trends in sedentary lifestyle, and other modifiable risk factors, and inadequate health care systems[8]. As a developing country, China has shown a relatively high and stable prevalence of hypertension among adult, especially in middle-aged and older people. Mahajan S, Zhang D, He S, et al. [9] showed the prevalence of hypertension among adults in China aged 45 and above was approximately 40.78% in 2011, 43.25% in 2013 and 41.81% in 2015. However, the proportion of hypertension control was still below 30%. Recently, hypertension control has become one of the critical public health intervention[10]. Therefore, it emphasizes the promotion of public health strategy to prevent the significant hypertension risk factors and assure the fullest available accessibility and use of quality health control for people with risk factors or who develop subclinical or overt hypertension. These actions are integral to a comprehensive public health strategy for hypertension promotion and prevention[11-13]. Though the etiology of hypertension is complex, one of the strongest risk factors was overweight/obesity. Thus, increased body mass index (BMI) or centrally located body fat (especially waist circle [WC]) increases the risk of developing hypertension.

Several studies[14-18]have reported that early biological maturation has been associated with obesity and blood pressure in adolescents. Werneck AO et al showed that behavioral and hereditary variables are more related to BP in late-maturing adolescents in adolescents. Widen E, et al[15] found that earlier pubertal timing associated with higher adult BMI and diastolic blood pressure in



1 both sexes. Mueller NT, et al [16] showed that earlier menarche was associated with higher waist  
2 circumference and BMI measured. Dreyfus J, et al[17] found that earlier age at menarche was  
3 associated with higher mean body mass index among African American and White women. Cao M,  
4 et al[18] showed that earlier age at menarche was associated with decreased diastolic blood  
5 pressure. However, it is not completely understood whether the changes in biological processes in  
6 the early years can affect cardiovascular outcomes across the life span. As important indicators of  
7 obesity, BMI/WC is directly associated with biological maturation (based on menarche age).  
8 Evidence from several studies[19-21] indicated that menarche was related to BMI in later life. Power  
9 C, et al[19] found that timing of puberty was strongly associated with BMI for the earlier maturers at  
10 ages 7-33 years. Adair LS, et al[20] showed that overweight prevalence rates were significantly  
11 higher in early maturing adolescents. Must A, et al[21] showed that early maturation in adult female  
12 overweight is mostly a result of the influence of elevated relative weight on early maturation. It has  
13 been speculated that the association between biological maturation and hypertension risk factors  
14 (based on menarche age) can be mediated or moderated by obesity parameters. Although  
15 speculative, the mediating or moderating role of obesity on the effect of early maturation (based  
16 on menarche age) on BP in adulthood has not been classified. However, this is especially important  
17 given that the onset of biological maturation, especially the age of menarche, now occurs at a much  
18 earlier age than in previous studies. Moreover, fully understanding the mediating effect of obesity  
19 on the association between early maturation (based on menarche age) and BP in adulthood could  
20 help identify women group that are at risk (based on obesity parameters) and those that should be  
21 put forward designed to place the many diverse conceptual and practice approaches and  
22 accomplishments in the early intervention. The moderating effect between early maturation (based  
23 on menarche age) and risk of hypertension (obesity parameters) on BP may also be fully considered.

24 To date, few studies on the mediating and moderating analysis between early maturation (based  
25 on menarche age) and risk of hypertension (obesity parameters) were conducted in individuals aged  
26  $\geq 45$  years. Thus, this study aimed to determine their association with age of menarche, obesity  
27 parameters, and other confounding factors using the large national cohort study (CHARLS) from  
28 individuals aged  $\geq 45$  years in China.

## METHODS

### Study design and setting

Data from a longitudinal study named the China Health and Retirement Longitudinal Study (CHARLS) were used in our research. The CHARLS was a nationally representative longitudinal study conducted by the China Centre for Economic Research at Peking University[22] from 2011. In the 2011 CHARLS Wave1, at baseline, 6883 individuals were recruited for a longitudinal study, 41 individuals were excluded because of the absence of medication history, a group of 1875 participants did not have their metabolic measures, and 65 individuals did not have their blood pressure. Additionally, 389 Individuals were excluded from those who used antihypertension drugs. Finally, 4513 individuals were included in the analyses.

## Individuals

The Individuals of the study were selected from the China Health and Retirement Longitudinal Study (CHARLS), Wave 1 (2011) [22]. The CHARLS involved 8779 individuals aged  $\geq 45$  years were total women [mean  $\pm$  standard deviation age=58.59  $\pm$  9.31years, ranged from 45 to 96years]. The mean and standard deviation of menarche age were 16.27 $\pm$ 2.18 years (ranged from 10 to 30 years).

## Self-report of risk factors

Baseline variables including age, age of menarche (0=  $\leq 14$ years, 1= 15years, 2= 16years, 3= 17years, 4=  $\geq 18$ years), educational levels (0= Illiterate, 1= Less than elementary school, 2= High school, 3= Above vocational school), marital status(0= Single, 1= Married), place of residence(0= Rural, 1= Urban), smoking habits(0= No, 1= Former smoke, 2= Current smoke), alcohol consumption (0= No, 1= Less than once a month, 2= More than once a month), eating meals (0=  $\leq 2$  meals per day, 1=3 meals per day, 2=  $\geq 4$  meals per day), social and leisure activities (0= No, 1= Yes), experience of a traumatic event(0= No, 1= Yes), physical exercise habit(0= No, 1= Less than regular physical exercises, 2= Regular physical exercises), history of cardiovascular diseases (0= No, 1= Yes), history of liver disease (0= No, 1= Yes), antihyperlipidemic drugs (0= No, 1= Yes), and antidiabetic drugs (0= No, 1= Yes) were collected using a type of self-report method. Most variables were depending on our previous research studies[23-27].

## Measurements

Triglycerides (TG) levels, low-density lipoprotein cholesterol (LDL-C), high-density lipoprotein cholesterol (HDL-C), and glycosylated hemoglobin (HbA1c) were analyzed by the enzymatic colorimetric tests, serum creatinine (Scr) and serum uric acid (SUA) levels were analyzed using the urinalysis (UA) plus method. The average value of blood pressure was measured by the mean of the 3-time measurements. BMI was calculated based on the measured weight and height of the participants. Tapeline was localized at navel levels to read the waist circle (WC) at the end of exhalation.

## Statistical analysis

The data are presented as means and standard deviation (SD) unless indicated otherwise. Means and standard deviation (continuous data) were used to describe continuous variables (Age, age of menarche, LDL-C, HDL-C, TG, HbA1c, Scr, SUA, BMI, WC, DBP, and SBP levels), and number and percentage (categorical data) were used to assess the categorical variables (educational levels, marital status, residence places, alcohol drinking, smoking habit, eating meals, social and leisure

1 activities, the experience of a traumatic event, taking physical activity or exercise, history of CVDs,  
2 history of liver diseases, history of antilipidemic medication, anti-diabetic medication). Between-  
3 group differences according to the age of menarche ( $\leq 14$  years, 15 years, 16 years, 17 years,  $\geq 18$  years)  
4 were evaluated by the Student's t-test (continuous data) or chi-square test (categorical data).  
5 Differences between two categories of baseline characteristics (marital status, residence places,  
6 social and leisure activities, the experience of a traumatic event, taking physical activity or exercise,  
7 history of CVDs, history of antilipidemic medication, history of liver diseases, anti-diabetic  
8 medication) were also evaluated using t-test. However, the trend of related variables (LDL-C, HDL-  
9 C, TG, HbA1c, SUA, BMI, WC, DBP, and SBP levels) by above three categories of baseline  
10 characteristics (age of menarche levels, educational levels, alcohol drinking, smoking habit, eating  
11 meals, taking physical activity or exercise) was also tested using contrast analysis. Correlations  
12 between baseline characteristics and BP were used by Spearman's correlation test. However,  
13 relationships between continuous variables (Age, LDL-C, HDL-C, TG, HbA1c, Scr, SUA, BMI, WC and  
14 menarche age) and BP were used by Pearson's correlation test. The mediation analysis was  
15 performed by model 4 in process v3.3[28-30], and the moderation analysis was used model 1 to  
16 assessment. All covariates (including age, educational levels, marital status, place of residence,  
17 smoking habits, drinking habits, eating meals, social and leisure activities, the experience of a  
18 traumatic event, taking physical activity or exercise, history of cardiovascular diseases, hepatitis  
19 history, antihyperlipidemic drugs, antidiabetic drugs, LDL-C, HDL-C, TG, HbA1c, Scr, SUA, ) were  
20 adjusted for in the mediation or moderation models. Analyses including the unstandardized (B),  
21 Standard Error (SE), or standardized coefficients ( $\beta$ ) with 95% confidence intervals(95%CI) were  
22 calculated using the setting of modelling building in IBM SPSS22.0 software for Windows10 (IBM  
23 Corp., Armonk, NY, USA) using the bootstrap method, with a 5% significance level.

### 47 **Patient and public involvement**

48 No patients were involved in the development of the question, design or data interpretation.  
49  
50  
51  
52  
53  
54  
55  
56  
57  
58  
59  
60

## RESULTS

The final sample consisted of 4513 women with an average age of  $58.59 \pm 9.31$  years (ranged from 45 to 96 years). The mean and standard deviation of menarche age were  $16.27 \pm 2.18$  years (ranged from 10 to 30 years). The mean and standard deviation of DBP and SBP level were  $76.31 \pm 12.45$  mmHg (ranged from 39 to 136 mmHg), and  $131.65 \pm 26.73$  mmHg (ranged from 76 to 235 mmHg), respectively. The mean and standard deviation of BMI and WC level were  $24.04 \pm 4.13$  kg/m<sup>2</sup> (ranged from 11.65 to 63.05 kg/m<sup>2</sup>), and  $84.67 \pm 12.83$  cm (ranged from 19.5 to 130.10 cm), respectively. Table 1 shows the baseline characteristics by the age of menarche. There were differences between the age of menarche in educational levels, place of residence, cigarette smoking, social events, and history of CVDs. However, between-group differences in the prevalence of marital status, drinking habits, eating habit, accidental injury history, physical exercises habit, hepatitis history, antilipidemic medication history, and antidiabetic medication history were not found. Women with a higher age of menarche had higher HCL-C level and age but had lower TG, SUA, BMI, WC, and DBP levels. Moreover, there were no differences in HbA1c, Scr, and SBP level between the age of menarche groups.

**Table 1 Baseline characteristics by age at menarche (N=4513)**

| Variables                            | ≤14(years)<br>N=946 | 15(years)<br>N=671 | 16(years)<br>N=930 | 17(years)<br>N=702 | ≥18(years)<br>N=1264 | P                  |
|--------------------------------------|---------------------|--------------------|--------------------|--------------------|----------------------|--------------------|
| Age(years)                           | 56.88±9.38          | 57.49±9.34         | 58.41±9.42         | 58.6±9.12          | 60.57±8.91           | 0.000 <sup>a</sup> |
| Educational levels                   |                     |                    |                    |                    |                      | 0.000              |
| Illiterate                           | 300(31.71)          | 233(34.72)         | 378(40.65)         | 314(44.73)         | 649(51.34)           |                    |
| Less than elementary school          | 527(55.71)          | 383(57.08)         | 486(52.26)         | 343(48.86)         | 572(45.25)           |                    |
| High school                          | 82(8.67)            | 42(6.26)           | 48(5.16)           | 34(4.84)           | 34(2.69)             |                    |
| Above vocational school              | 37(3.91)            | 13(1.94)           | 18(1.94)           | 11(1.57)           | 9(0.71)              |                    |
| Marital status                       |                     |                    |                    |                    |                      | 0.101              |
| Single                               | 137(14.48)          | 79(11.77)          | 137(14.73)         | 98(13.96)          | 207(16.38)           |                    |
| Married                              | 809(85.52)          | 592(88.23)         | 793(85.27)         | 604(86.04)         | 1057(83.62)          |                    |
| Place of residence                   |                     |                    |                    |                    |                      | 0.000              |
| Rural                                | 519(54.86)          | 426(63.49)         | 577(62.04)         | 454(64.67)         | 885(70.02)           |                    |
| Urban                                | 427(45.14)          | 245(36.51)         | 353(37.96)         | 248(35.33)         | 379(29.98)           |                    |
| Cigarette smoking                    |                     |                    |                    |                    |                      | 0.017              |
| NO                                   | 883(93.34)          | 629(93.74)         | 846(90.97)         | 646(92.02)         | 1156(91.46)          |                    |
| Former smoke                         | 8(0.85)             | 11(1.64)           | 18(1.94)           | 13(1.85)           | 38(3.01)             |                    |
| Current smoke                        | 55(5.81)            | 31(4.62)           | 66(7.1)            | 43(6.13)           | 70(5.54)             |                    |
| Alcohol habit                        |                     |                    |                    |                    |                      | 0.520              |
| NO                                   | 827(87.42)          | 607(90.46)         | 809(86.99)         | 620(88.32)         | 1100(87.03)          |                    |
| Less than once a month               | 45(4.76)            | 26(3.87)           | 48(5.16)           | 37(5.27)           | 65(5.14)             |                    |
| More than once a month               | 74(7.82)            | 38(5.66)           | 73(7.85)           | 45(6.41)           | 99(7.83)             |                    |
| Eating habit                         |                     |                    |                    |                    |                      | 0.706              |
| ≤2 meals per day                     | 131(13.85)          | 99(14.75)          | 123(13.23)         | 82(11.68)          | 172(13.61)           |                    |
| 3 meals per day                      | 804(84.99)          | 567(84.5)          | 794(85.38)         | 609(86.75)         | 1073(84.89)          |                    |
| ≥4 meals per day                     | 11(1.16)            | 5(0.75)            | 13(1.40)           | 11(1.57)           | 19(1.50)             |                    |
| Social events                        |                     |                    |                    |                    |                      | 0.002              |
| No                                   | 417(44.08)          | 335(49.93)         | 470(50.54)         | 372(52.99)         | 655(51.82)           |                    |
| Yes                                  | 529(55.92)          | 336(50.07)         | 460(49.46)         | 330(47.01)         | 609(48.18)           |                    |
| History of accidental injury         |                     |                    |                    |                    |                      | 0.837              |
| No                                   | 881(93.13)          | 630(93.89)         | 867(93.23)         | 652(92.88)         | 1169(92.48)          |                    |
| Yes                                  | 65(6.87)            | 41(6.11)           | 63(6.77)           | 50(7.12)           | 95(7.52)             |                    |
| Physical exercises habit             |                     |                    |                    |                    |                      | 0.260              |
| No physical exercise                 | 587(62.05)          | 393(58.57)         | 556(59.78)         | 428(60.97)         | 771(61.00)           |                    |
| Less than regular physical exercises | 178(18.82)          | 137(20.42)         | 171(18.39)         | 136(19.37)         | 271(21.44)           |                    |
| Regular physical exercises           | 181(19.13)          | 141(21.01)         | 203(21.83)         | 138(19.66)         | 222(17.56)           |                    |
| History of cardiovascular disease    |                     |                    |                    |                    |                      | 0.033              |
| No                                   | 810(85.62)          | 590(87.93)         | 780(83.87)         | 605(86.18)         | 1115(88.21)          |                    |
| Yes                                  | 136(14.38)          | 81(12.07)          | 150(16.13)         | 97(13.82)          | 149(11.79)           |                    |

|    |                                     |              |               |              |              |              |                    |
|----|-------------------------------------|--------------|---------------|--------------|--------------|--------------|--------------------|
| 1  | Hepatitis history                   |              |               |              |              |              |                    |
| 2  | No                                  | 910(96.19)   | 647(96.42)    | 885(95.16)   | 670(95.44)   | 1226(96.99)  | 0.205              |
| 3  | Yes                                 | 36(3.81)     | 24(3.58)      | 45(4.84)     | 32(4.56)     | 38(3.01)     |                    |
| 4  | History of antilipidemic medication |              |               |              |              |              |                    |
| 5  | No                                  | 884(93.45)   | 628(93.59)    | 884(95.05)   | 656(93.45)   | 1184(93.67)  | 0.566              |
| 6  | Yes                                 | 62(6.55)     | 43(6.41)      | 46(4.95)     | 46(6.55)     | 80(6.33)     |                    |
| 7  | History of antidiabetic medication  |              |               |              |              |              |                    |
| 8  | No                                  | 910(96.19)   | 645(96.13)    | 883(94.95)   | 663(94.44)   | 1213(95.97)  | 0.309              |
| 9  | Yes                                 | 36(3.81)     | 26(3.87)      | 47(5.05)     | 39(5.56)     | 51(4.03)     |                    |
| 10 | LDL Cholesterol                     | 119.66±35.04 | 118.04±35.61  | 120.62±34.81 | 121.79±36.79 | 121.45±35.27 | 0.065 <sup>a</sup> |
| 11 | HDL Cholesterol                     | 50.57±14.17  | 51.31±14.01   | 50.84±14.43  | 51.05±14.18  | 53.2±14.87   | 0.000 <sup>a</sup> |
| 12 | Triglycerides                       | 143.09±99.89 | 142.86±103.67 | 142.07±98.31 | 145.85±132.3 | 124.16±76.25 | 0.000 <sup>a</sup> |
| 13 | HbA1c                               | 5.31±0.83    | 5.25±0.86     | 5.31±0.89    | 5.32±0.84    | 5.27±0.76    | 0.594 <sup>a</sup> |
| 14 | Scr                                 | 0.69±0.14    | 0.69±0.14     | 0.70±0.18    | 0.68±0.13    | 0.69±0.15    | 0.813 <sup>a</sup> |
| 15 | SUA                                 | 4.09±1.10    | 3.99±1.09     | 4.04±1.07    | 4.01±1.01    | 3.97±1.05    | 0.021 <sup>a</sup> |
| 16 | BMI                                 | 24.63±4.11   | 24.39±4.15    | 24.02±3.90   | 24.18±4.49   | 23.36±3.99   | 0.000 <sup>a</sup> |
| 17 | WC                                  | 86.08±13.01  | 85.35±12.62   | 85.29±11.33  | 84.53±13.38  | 82.89±13.36  | 0.000 <sup>a</sup> |
| 18 | DBP                                 | 77.07±12.07  | 77.28±12.53   | 77.01±12.51  | 76.31±12.80  | 74.72±25.82  | 0.000 <sup>a</sup> |
| 19 | SBP                                 | 131.09±26.36 | 131.66±25.49  | 131.63±26.64 | 129.90±29.9  | 129.47±25.82 | 0.062 <sup>a</sup> |

<sup>a</sup>P-value for trend

Baseline characteristics, according to BMI and WC in women, are presented in Table 2. Firstly, women with more alcohol drinking, higher age of menarche had lower BMI and WC levels; Secondly, women with a history of cardiovascular diseases, antilipidemic medication, and antidiabetic medication had higher BMI and WC levels than women without medical illness. Thirdly, women with higher educational levels, being married, being current smoking, taking more eating meals, and taking social events had higher BML level. At last, women with accidental injury had higher WC level.

**Table 2 Baseline characteristics by age at menarche (N=4513)**

| Variables                            | BMI (cm)   | WC (cm)     | P-value for BMI    | P-value for WC     |
|--------------------------------------|------------|-------------|--------------------|--------------------|
| Educational levels                   |            |             |                    |                    |
| Illiterate                           | 23.57±4.19 | 84.35±12.95 | 0.001 <sup>a</sup> | 0.971 <sup>a</sup> |
| Less than elementary school          | 24.31±4.03 | 85.14±12.48 |                    |                    |
| High school                          | 24.93±4.07 | 83.17±14.65 |                    |                    |
| Above vocational school              | 24.85±4.43 | 83.40±13.99 |                    |                    |
| Marital status                       |            |             |                    |                    |
| Single                               | 23.21±4.18 | 84.93±12.04 | 0.000              | 0.582              |
| Married                              | 24.19±4.10 | 84.63±12.97 |                    |                    |
| Place of residence                   |            |             |                    |                    |
| Rural                                | 23.64±3.96 | 83.95±12.42 | 0.000              | 0.000              |
| Urban                                | 24.75±4.32 | 85.94±13.43 |                    |                    |
| Cigarette smoking                    |            |             |                    |                    |
| NO                                   | 24.11±4.12 | 84.73±12.77 | 0.000 <sup>a</sup> | 0.135 <sup>a</sup> |
| Former smoke                         | 23.79±4.14 | 86.83±10.36 |                    |                    |
| Current smoke                        | 23.17±4.11 | 83.13±14.40 |                    |                    |
| Alcohol habit                        |            |             |                    |                    |
| NO                                   | 24.10±4.14 | 85.02±12.5  | 0.011 <sup>a</sup> | 0.000 <sup>a</sup> |
| Less than once a month               | 23.88±4.17 | 81.78±15.16 |                    |                    |
| More than once a month               | 23.51±3.94 | 82.49±14.62 |                    |                    |
| Eating habit                         |            |             |                    |                    |
| ≤2 meals per day                     | 23.27±3.89 | 84.12±10.42 | 0.000 <sup>a</sup> | 0.734 <sup>a</sup> |
| 3 meals per day                      | 24.18±4.14 | 84.82±13.18 |                    |                    |
| ≥4 meals per day                     | 23.10±4.69 | 80.82±12.01 |                    |                    |
| Social events                        |            |             |                    |                    |
| No                                   | 23.64±4.09 | 84.34±12.08 | 0.000              | 0.085              |
| Yes                                  | 24.45±4.13 | 85.00±13.53 |                    |                    |
| History of accidental injury         |            |             |                    |                    |
| No                                   | 24.06±4.14 | 84.82±12.57 | 0.474              | 0.004              |
| Yes                                  | 23.88±3.94 | 82.64±15.81 |                    |                    |
| Physical exercises habit             |            |             |                    |                    |
| No physical exercise                 | 24.05±4.29 | 84.79±12.74 | 0.400 <sup>a</sup> | 0.701 <sup>a</sup> |
| Less than regular physical exercises | 23.82±3.70 | 84.25±12.48 |                    |                    |
| Regular physical exercises           | 24.26±4.03 | 84.74±13.48 |                    |                    |
| History of cardiovascular disease    |            |             |                    |                    |
| No                                   | 23.92±4.09 | 84.26±12.63 | 0.000              | 0.000              |

|    |                                     |             |             |                    |                    |
|----|-------------------------------------|-------------|-------------|--------------------|--------------------|
| 1  | Yes                                 | 24.83±4.28  | 87.25±13.89 |                    |                    |
| 2  | Hepatitis history                   |             |             |                    |                    |
| 3  | No                                  | 24.04±4.15  | 84.66±12.79 | 0.871              | 0.948              |
| 4  | Yes                                 | 24.09±3.47  | 84.73±14.37 |                    |                    |
| 5  | History of antilipidemic medication |             |             |                    |                    |
| 6  | No                                  | 23.87±3.99  | 84.22±12.72 | 0.000              | 0.000              |
| 7  | Yes                                 | 26.75±5.14  | 91.59±12.58 |                    |                    |
| 8  | History of antidiabetic medication  |             |             |                    |                    |
| 9  | No                                  | 23.95±4.01  | 84.42±12.81 | 0.000              | 0.000              |
| 10 | Yes                                 | 26.13±5.81  | 90.18±12.20 |                    |                    |
| 11 | Menarche age(years)                 |             |             |                    |                    |
| 12 | ≤14                                 | 24.63±4.11  | 86.08±13.01 | 0.000 <sup>a</sup> | 0.000 <sup>a</sup> |
| 13 | 15                                  | 24.39±4.15  | 85.35±12.62 |                    |                    |
| 14 | 16                                  | 24.02±3.90  | 85.29±11.33 |                    |                    |
| 15 | 17                                  | 24.18±4.49  | 84.53±13.38 |                    |                    |
| 16 | ≥18                                 | 23.36±13.36 | 82.89±13.36 |                    |                    |

<sup>a</sup>P-value for trend

Baseline characteristics, according to DBP and SBP in women, are presented in Table 3. Firstly, women with more alcohol drinking had lower DBP and SBP levels; Secondly, women with a history of antilipidemic medication had higher DBP and SBP levels than women without medical illness. Thirdly, women with more eating meals, higher age of menarches had higher DBP level. At last, women with higher educational levels, being married, and more alcohol drinking had lower DBP level, but women with cardiovascular diseases and antidiabetic medication had higher SBP level than women without medical illness.

**Table3 Baseline characteristics by age at menarche (N=4513)**

| Variables                            | DBP         | SBP          | P-value for DBP    | P-value for SBP    |
|--------------------------------------|-------------|--------------|--------------------|--------------------|
| Educational levels                   |             |              |                    |                    |
| Illiterate                           | 76.37±12.45 | 133.93±28.43 | 0.288 <sup>a</sup> | 0.000 <sup>a</sup> |
| Less than elementary school          | 76.38±12.42 | 128.89±24.99 |                    |                    |
| High school                          | 76.12±12.65 | 122.98±18.58 |                    |                    |
| Above vocational school              | 73.86±12.47 | 127.84±40.38 |                    |                    |
| Marital status                       |             |              |                    |                    |
| Single                               | 76.70±11.96 | 139.61±31.93 | 0.388              | 0.000              |
| Married                              | 76.25±12.53 | 129.12±25.42 |                    |                    |
| Place of residence                   |             |              |                    |                    |
| Rural                                | 76.20±12.72 | 130.18±25.92 | 0.435              | 0.121              |
| Urban                                | 76.50±11.96 | 131.46±28.06 |                    |                    |
| Cigarette smoking                    |             |              |                    |                    |
| NO                                   | 76.32±12.45 | 130.43±26.97 | 0.673 <sup>a</sup> | 0.051 <sup>a</sup> |
| Former smoke                         | 73.60±11.41 | 132.13±22.83 |                    |                    |
| Current smoke                        | 77.09±12.65 | 133.61±23.78 |                    |                    |
| Alcohol habit                        |             |              |                    |                    |
| NO                                   | 76.53±12.38 | 131.27±27.27 | 0.003 <sup>a</sup> | 0.001 <sup>a</sup> |
| Less than once a month               | 74.76±12.18 | 123.81±19.94 |                    |                    |
| More than once a month               | 74.73±13.26 | 127.77±23.06 |                    |                    |
| Eating habit                         |             |              |                    |                    |
| ≤2 meals per day                     | 77.69±12.60 | 132.14±26.68 | 0.000 <sup>a</sup> | 0.117 <sup>a</sup> |
| 3 meals per day                      | 76.17±12.41 | 130.44±26.37 |                    |                    |
| ≥4 meals per day                     | 71.56±11.46 | 128.63±44.41 |                    |                    |
| Social events                        |             |              |                    |                    |
| No                                   | 76.08±12.60 | 130.66±26.33 | 0.216              | 0.975              |
| Yes                                  | 76.54±12.30 | 130.64±27.12 |                    |                    |
| History of accidental injury         |             |              |                    |                    |
| No                                   | 76.38±12.47 | 130.84±27.12 | 0.219              | 0.075              |
| Yes                                  | 75.48±12.14 | 128.05±20.66 |                    |                    |
| Physical exercises habit             |             |              |                    |                    |
| No physical exercise                 | 76.34±12.46 | 131.47±28.25 | 0.873 <sup>a</sup> | 0.024 <sup>a</sup> |
| Less than regular physical exercises | 76.05±12.76 | 129.23±22.14 |                    |                    |
| Regular physical exercises           | 76.50±12.08 | 129.54±26.03 |                    |                    |

|    |                                     |             |              |                    |                    |
|----|-------------------------------------|-------------|--------------|--------------------|--------------------|
| 1  | History of cardiovascular disease   |             |              |                    |                    |
| 2  | No                                  | 76.11±12.44 | 130.02±26.29 | 0.021              | 0.000              |
| 3  | Yes                                 | 77.39±12.40 | 134.50±29.28 |                    |                    |
| 4  | Hepatitis history                   |             |              |                    |                    |
| 5  | No                                  | 76.36±12.45 | 130.76±26.50 | 0.017              | 0.144              |
| 6  | Yes                                 | 74.10±11.56 | 127.76±32.79 |                    |                    |
| 7  | History of antilipidemic medication |             |              |                    |                    |
| 8  | No                                  | 76.07±12.34 | 130.12±26.01 | 0.000              | 0.000              |
| 9  | Yes                                 | 80.09±13.46 | 138.80±35.01 |                    |                    |
| 10 | History of antidiabetic medication  |             |              |                    |                    |
| 11 | No                                  | 76.25±12.47 | 130.17±25.46 | 0.100              | 0.000              |
| 12 | Yes                                 | 77.73±11.83 | 140.96±45.17 |                    |                    |
| 13 | Menarche age(years)                 |             |              |                    |                    |
| 14 | ≤14                                 |             |              |                    |                    |
| 15 | 15                                  | 77.07±12.07 | 131.09±26.36 | 0.000 <sup>a</sup> | 0.062 <sup>a</sup> |
| 16 | 16                                  | 77.28±12.53 | 131.66±25.49 |                    |                    |
| 17 | 17                                  | 77.01±12.51 | 131.63±26.64 |                    |                    |
| 18 | ≥18                                 | 76.31±12.80 | 129.90±29.90 |                    |                    |

<sup>a</sup>P-value for trend

Correlations between baseline characteristics, independent, moderators, mediators and dependent variables, according to DBP and SBP, are presented in Table 4. Firstly, drinking, antilipidemic medication, LDL-C, HDL-C, TG, HbA<sub>1c</sub>, Scr, SUA, BMI, and WC were significantly correlated with DBP and SBP in women; Secondly, eating meals, history of CVDs, history of liver diseases, and menarche age were significantly correlated with DBP; At last, age, educational levels, marital status, physical exercises, history of CVDs, and antidiabetic medication were significantly correlated with SBP.

**Table4 Relationship between various characteristics and blood pressure status of participants (N=4513)**

| Variables                         | DBP<br>r(P)   | SBP<br>r(P)   |
|-----------------------------------|---------------|---------------|
| Age                               | -0.016(0.275) | 0.259(0.000)  |
| Education                         | -0.016(0.288) | -0.106(0.000) |
| Marital status                    | -0.013(0.388) | -0.139(0.000) |
| Current residence                 | 0.012(0.435)  | 0.023(0.121)  |
| Smoke                             | 0.006(0.673)  | 0.029(0.051)  |
| Drinking                          | -0.045(0.003) | -0.051(0.001) |
| Eating meals                      | -0.055(0.000) | -0.023(0.117) |
| Taking activities                 | 0.018(0.216)  | 0.000(0.975)  |
| Major accidental injury           | -0.018(0.219) | -0.027(0.075) |
| Having regular physical exercises | 0.002(0.873)  | -0.034(0.024) |
| History of CVD                    | 0.035(0.018)  | 0.058(0.000)  |
| History of liver diseases         | -0.035(0.018) | -0.022(0.146) |
| Antilipidemic medication          | 0.078(0.000)  | 0.078(0.000)  |
| Antidiabetic medication           | 0.025(0.100)  | 0.083(0.000)  |
| LDL Cholesterol                   | 0.050(0.001)  | 0.060(0.000)  |
| HDL Cholesterol                   | -0.099(0.000) | -0.062(0.000) |
| Triglycerides                     | 0.100(0.000)  | 0.091(0.000)  |
| HbA <sub>1c</sub>                 | 0.061(0.000)  | 0.066(0.000)  |
| Scr                               | 0.056(0.000)  | 0.076(0.000)  |



|   |              |               |               |
|---|--------------|---------------|---------------|
| 1 | SUA          | 0.085(0.000)  | 0.111(0.000)  |
| 2 | BMI          | 0.221(0.000)  | 0.129(0.000)  |
| 3 | WC           | 0.183(0.000)  | 0.177(0.000)  |
| 4 | Menarche age | -0.060(0.000) | -0.014(0.335) |

8 In the moderator analysis, we tested the interaction between menarche age and obesity in  
 9 predicting systolic and diastolic BP. The standard error, standardized coefficients and the adjusting  
 10 associated 95% confidence intervals (CIs) are shown in Table 5. We controlled for socio-  
 11 demographic characteristics, health behaviors, medical histories, and metabolic measures. After  
 12 controlling for the total potential confounders, the moderating effect of obesity indicators on the  
 13 relationship between age of menarche and BP was tested. The interaction term of obesity  
 14 parameters\*age of menarche was not significant for predicting either DBP (BMI, adjusted  $P= 0.2556$ ;  
 15 WC, adjusted  $P= 0.1833$ ) or SBP (BMI, adjusted  $P= 0.8561$ ; WC, adjusted  $P= 0.8427$ ) in women.  
 16  
 17  
 18  
 19  
 20  
 21  
 22  
 23  
 24  
 25  
 26  
 27  
 28  
 29  
 30  
 31  
 32  
 33  
 34  
 35  
 36  
 37  
 38  
 39  
 40  
 41  
 42  
 43  
 44  
 45  
 46  
 47  
 48  
 49  
 50  
 51  
 52  
 53  
 54  
 55  
 56  
 57  
 58  
 59  
 60

**Table5 Moderator effect of obesity on the relationship between menarche age and BP in women (N=4513)**

| Dependent | Variables         | Model one <sup>a</sup> |                           |        | Model two <sup>b</sup> |                           |        | Model three <sup>c</sup> |                           |        | Model four <sup>d</sup> |                           |        | Model five <sup>e</sup> |                           |        |
|-----------|-------------------|------------------------|---------------------------|--------|------------------------|---------------------------|--------|--------------------------|---------------------------|--------|-------------------------|---------------------------|--------|-------------------------|---------------------------|--------|
|           |                   | SE                     | B (95%CI)                 | P      | se                     | B (95%CI)                 | P      | SE                       | B (95%CI)                 | P      | SE                      | B (95%CI)                 | P      | se                      | B (95%CI)                 | P      |
| DBP       | Menarche age      | 0.0835                 | -0.2027(-0.3665, -0.0390) | 0.0153 | 0.0855                 | -0.2528(-0.4203, -0.0852) | 0.0031 | 0.0853                   | -0.2411(-0.4084, -0.0738) | 0.0047 | 0.0854                  | -0.2485(-0.4158, -0.0811) | 0.0036 | 0.0973                  | -0.2162(-0.4069, -0.0254) | 0.0263 |
|           | BMI               | 0.0440                 | 0.6546(0.5684,0.7409)     | 0.0000 | 0.0447                 | 0.6757(0.5881,0.7634)     | 0.0000 | 0.0449                   | 0.6835(0.5955,0.7715)     | 0.0000 | 0.0458                  | 0.6647(0.5750,0.7544)     | 0.0000 | 0.0556                  | 0.5916(0.4827,0.7005)     | 0.0000 |
|           | BMI× Menarche age | 0.0204                 | 0.0279(-0.0121,0.0678)    | 0.1719 | 0.0204                 | 0.0258(-0.0141,0.0658)    | 0.2046 | 0.0203                   | 0.0247(-0.0152,0.0645)    | 0.2248 | 0.0203                  | 0.0220(-0.0178,0.0618)    | 0.2790 | 0.0229                  | 0.0260(-0.0189,0.071)     | 0.2556 |
| SBP       | Menarche age      | 0.1826                 | -0.0003(-0.3583,0.3576)   | 0.9986 | 0.1789                 | -0.5822(-0.9329, -0.2315) | 0.0011 | 0.1788                   | -0.5682(-0.9187, -0.2177) | 0.0015 | 0.1795                  | -0.5944(-0.9462, -0.2425) | 0.0009 | 0.2141                  | -0.5084(-0.9282, -0.0886) | 0.0176 |
|           | BMI               | 0.0964                 | 0.8361(0.6470,1.0251)     | 0.0000 | 0.0938                 | 1.0927(0.9088,1.2766)     | 0.0000 | 0.0942                   | 1.0906(0.9058,1.2753)     | 0.0000 | 0.0965                  | 1.0287(0.8396,1.2178)     | 0.0000 | 0.1223                  | 0.8846(0.6448,1.1244)     | 0.0000 |
|           | BMI× Menarche age | 0.0446                 | 0.0178(-0.0696,0.1052)    | 0.6896 | 0.0426                 | 0.0111(-0.0726,0.0947)    | 0.7955 | 0.0426                   | 0.0113(-0.0722,0.0948)    | 0.7914 | 0.0427                  | 0.0052(-0.0786,0.0889)    | 0.9038 | 0.0504                  | 0.0091(-0.0897,0.108)     | 0.8561 |
| DBP       | Menarche age      | 0.0838                 | -0.2569(-0.4213, -0.0925) | 0.0022 | 0.0861                 | -0.2588(-0.4277, -0.0900) | 0.0027 | 0.0861                   | -0.2481(-0.4168, -0.0794) | 0.0040 | 0.0861                  | -0.2561(-0.4248, -0.0873) | 0.0029 | 0.0979                  | -0.2001(-0.3921, -0.0082) | 0.0410 |
|           | WC                | 0.0142                 | 0.1732(0.1452,0.2011)     | 0.0000 | 0.0143                 | 0.1752(0.1471,0.2032)     | 0.0000 | 0.0143                   | 0.1730(0.1449,0.2011)     | 0.0000 | 0.0145                  | 0.1645(0.1361,0.193)      | 0.0000 | 0.0172                  | 0.1472(0.1135,0.1809)     | 0.0000 |
|           | WC× Menarche age  | 0.0065                 | 0.0058(-0.007,0.0186)     | 0.3758 | 0.0066                 | 0.0054(-0.0075,0.0182)    | 0.4136 | 0.0065                   | 0.005(-0.0079,0.0178)     | 0.4473 | 0.0065                  | 0.0043(-0.0085,0.0171)    | 0.5075 | 0.0074                  | 0.0099(-0.0047,0.0244)    | 0.1833 |
| SBP       | Menarche age      | 0.1777                 | -0.0009(-0.3492,0.3475)   | 0.9961 | 0.1761                 | -0.5656(-0.9107, -0.2204) | 0.0013 | 0.1760                   | -0.5546(-0.8997, -0.2094) | 0.0016 | 0.1766                  | -0.581(-0.9273, -0.2347)  | 0.0010 | 0.2096                  | -0.4548(-0.8658, -0.0438) | 0.0301 |
|           | WC                | 0.0302                 | 0.3637(0.3044,0.4229)     | 0.0000 | 0.0293                 | 0.3228(0.2654,0.3802)     | 0.0000 | 0.0294                   | 0.3153(0.2578,0.3729)     | 0.0000 | 0.0298                  | 0.2944(0.236,0.3528)      | 0.0000 | 0.0368                  | 0.2744(0.2022,0.3466)     | 0.0000 |
|           | WC× Menarche age  | 0.0139                 | -0.0156(-0.0428,0.0116)   | 0.2607 | 0.0134                 | -0.0061(-0.0323,0.0202)   | 0.6501 | 0.0134                   | -0.0063(-0.0326,0.0199)   | 0.6367 | 0.0134                  | -0.0081(-0.0344,0.0182)   | 0.5443 | 0.0159                  | -0.0032(-0.0343,0.028)    | 0.8427 |

BMI: body mass index; WC: waist circle; DBP: diastolic blood pressure; SUA: serum uric acid; SBP: systolic blood pressure; Un-standardized: B; Standard Error: SE.

<sup>a</sup> Unadjusted;

<sup>b</sup> Adjusted for age, educational levels, marital status, place of residence;

<sup>c</sup> Adjusted for age, educational levels, marital status, place of residence, smoking habits, drinking habits, eating meals, social and leisure activities, experience of a traumatic event, taking physical activity or exercise;

<sup>d</sup> Adjusted for age, educational levels, marital status, place of residence, smoking habits, drinking habits, eating meals, social and leisure activities, experience of a traumatic event, taking physical activity or exercise, history of cardiovascular disease, hepatitis history, antihyperlipidemic drugs, antidiabetic drugs;

<sup>e</sup> Adjusted for age, educational levels, marital status, place of residence, smoking habits, drinking habits, eating meals, social and leisure activities, experience of a traumatic event, taking physical activity or exercise, history of cardiovascular disease, hepatitis history, antihyperlipidemic drugs, , antidiabetic drugs, LDL Cholesterol, HDL Cholesterol, Triglycerides, HbA1c, serum creatinine, serum uric acid.

1 In the mediation analysis, we estimated the BP equation using bootstrap inference for model  
2 coefficients. The un-standardized, standardized coefficients and the adjusting associated 95%  
3 confidence intervals (CIs) are shown in Table 6. We controlled for socio-demographic characteristics,  
4 health behaviors, medical histories, and metabolic measures. After controlling for the total potential  
5 confounders, the mediating effect of obesity indicators on the relationship between age of  
6 menarche and BP was tested. All correlations were significant correlation between age of menarche,  
7 obesity parameters and BP except the path of the age of menarche→BP (with the addition of the  
8 BMI or WC indicator) in model one. In general, after controlling for potential confounders. WC and  
9 BMI partly mediated the relationship between age of menarche and BP.  
10  
11  
12  
13  
14  
15  
16  
17  
18  
19  
20  
21  
22  
23  
24  
25  
26  
27  
28  
29  
30  
31  
32  
33  
34  
35  
36  
37  
38  
39  
40  
41  
42  
43  
44  
45  
46  
47  
48  
49  
50  
51  
52  
53  
54  
55  
56  
57  
58  
59  
60

**Table6 Mediation effect of obesity on the relationship between age at menarche and BP in women (N=4513)**

| Path  |                  | Model one <sup>a</sup> |                           |        | Model two <sup>b</sup> |                           |        | Model three <sup>c</sup> |                           |        | Model four <sup>d</sup> |                           |        | Model five <sup>e</sup> |                           |        |
|-------|------------------|------------------------|---------------------------|--------|------------------------|---------------------------|--------|--------------------------|---------------------------|--------|-------------------------|---------------------------|--------|-------------------------|---------------------------|--------|
|       |                  | $\beta$                | B (95%CI)                 | P      | $\beta$                | B (95%CI)                 | P      | $\beta$                  | B (95%CI)                 | P      | $\beta$                 | B (95%CI)                 | P      | $\beta$                 | B (95%CI)                 | P      |
| Path1 | Menarche age→BMI | -0.1080                | -0.2045(-0.2595, -0.1496) | 0.0000 | -0.0725                | -0.1374(-0.1930, -0.0818) | 0.0000 | -0.0707                  | -0.1339(-0.1892, -0.0786) | 0.0000 | -0.0705                 | -0.1334(-0.1880, -0.0788) | 0.0000 | -0.0468                 | -0.0885(-0.1409, -0.0361) | 0.0009 |
|       | Menarche age→DBP | -0.0367                | -0.2096(-0.3731, -0.0461) | 0.0120 | -0.0454                | -0.2596(-0.4268, -0.0924) | 0.0024 | -0.0433                  | -0.2475(-0.4145, -0.0806) | 0.0037 | -0.0447                 | -0.2542(-0.4213, -0.0872) | 0.0029 | -0.0379                 | -0.2154(-0.3833, -0.0474) | 0.0120 |
|       | BMI→DBP          | 0.2171                 | 0.6545(0.5682,0.7408)     | 0.0000 | 0.2241                 | 0.6757(0.5881, 0.7634)    | 0.0000 | 0.2276                   | 0.6835(0.5955, 0.7715)    | 0.0000 | 0.2208                  | 0.6643(0.5746,0.7541)     | 0.0000 | 0.1986                  | 0.5973(0.5026,0.6921)     | 0.0000 |
|       | Total effect     | -0.0601                | -0.3435(-0.5099, -0.177)  | 0.0001 | -0.0617                | -0.3524(-0.5234, -0.1815) | 0.0001 | -0.0593                  | -0.3390(-0.5098, -0.1683) | 0.0001 | -0.0602                 | -0.3429(-0.5133, -0.1724) | 0.0001 | -0.0471                 | -0.2682(-0.4388, -0.0976) | 0.0021 |
| Path2 | Menarche age→BMI | 0.1085                 | -0.2051(-0.2601, -0.1502) | 0.0000 | -0.0731                | -0.1381(-0.1936, -0.0826) | 0.0000 | -0.0712                  | -0.1346(-0.1898, -0.0793) | 0.0000 | -0.0711                 | -0.1342(-0.1887, -0.0797) | 0.0000 | -0.0473                 | -0.0892(-0.1416, -0.0369) | 0.0008 |
|       | Menarche age→SBP | -0.0004                | -0.0046(-0.3619,0.3526)   | 0.9797 | -0.0477                | -0.585(-0.9350, -0.2351)  | 0.0011 | -0.0466                  | -0.5711(-0.9209, -0.2213) | 0.0014 | -0.0486                 | -0.5957(-0.9468, -0.2446) | 0.0009 | -0.0446                 | -0.5479(-0.9025, -0.1932) | 0.0025 |
|       | BMI→SBP          | 0.1289                 | 0.8359(0.6469,1.0249)     | 0.0000 | 0.1685                 | 1.0927(0.9088, 1.2766)    | 0.0000 | 0.1682                   | 1.0905(0.9058,1.2753)     | 0.0000 | 0.1585                  | 1.0286(0.8395,1.2176)     | 0.0000 | 0.1441                  | 0.9366(0.7361,1.1371)     | 0.0000 |
|       | Total effect     | -0.0144                | -0.1761(-0.5342,0.182)    | 0.3350 | -0.0601                | -0.736(-1.0902, -0.3817)  | 0.0000 | -0.0586                  | -0.7178(-1.0719, -0.3638) | 0.0001 | -0.0599                 | -0.7337(-1.0883, -0.3791) | 0.0001 | -0.0515                 | -0.6314(-0.9889, -0.2739) | 0.0005 |
| Path3 | Menarche age→WC  | -0.0837                | -0.4928(-0.6642, -0.3213) | 0.0000 | -0.0910                | -0.5355(-0.7107, -0.3602) | 0.0000 | -0.0896                  | -0.5275(-0.7024, -0.3526) | 0.0000 | -0.0898                 | -0.5285(-0.7026, -0.3545) | 0.0000 | -0.0696                 | -0.4085(-0.5778, -0.2392) | 0.0000 |
|       | Menarche age→DBP | -0.0454                | -0.2589(-0.4232, -0.0945) | 0.0020 | -0.0456                | -0.26(-0.4288, -0.0912)   | 0.0025 | -0.0437                  | -0.2491(-0.4178, -0.0805) | 0.0038 | -0.0452                 | -0.2571(-0.4257, -0.0884) | 0.0028 | -0.0373                 | -0.2118(-0.3811, -0.0424) | 0.0143 |
|       | WC→DBP           | 0.1789                 | 0.1733(0.1454, 0.2013)    | 0.0000 | -0.1810                | 0.1754(0.1473, 0.2034)    | 0.0000 | 0.1787                   | 0.1732(0.1451, 0.2013)    | 0.0000 | 0.1705                  | 0.1647(0.1363, 0.1931)    | 0.0000 | 0.1445                  | 0.1399(0.1104, 0.1695)    | 0.0000 |
|       | Total effect     | -0.0604                | -0.3443(-0.5107, -0.1779) | 0.0001 | -0.0620                | -0.3539(-0.5248, -0.183)  | 0.0001 | -0.0597                  | -0.3405(-0.5112, -0.1698) | 0.0001 | -0.0606                 | -0.3441(-0.5145, -0.1737) | 0.0001 | -0.0474                 | -0.2689(-0.4395, -0.0984) | 0.0020 |
| Path4 | Menarche age→WC  | -0.0849                | -0.4944(-0.6658, -0.323)  | 0.0000 | -0.0914                | -0.5376(-0.7129, -0.3624) | 0.0000 | -0.0901                  | -0.5299(-0.7048, -0.355)  | 0.0000 | -0.0904                 | -0.531(-0.7051, -0.357)   | 0.0000 | -0.0702                 | -0.411(-0.5803, -0.2417)  | 0.0000 |
|       | Menarche age→SBP | 0.0004                 | 0.0044(-0.3439, 0.3526)   | 0.9804 | -0.0468                | -0.5643(-0.9094, -0.2192) | 0.0014 | -0.0459                  | -0.5533(-0.8983, -0.2082) | 0.0017 | -0.0481                 | -0.5792(-0.9255, -0.233)  | 0.0010 | -0.0433                 | -0.5228(-0.8721, -0.1735) | 0.0034 |
|       | WC→SBP           | 0.1772                 | 0.3632(0.3040, 0.4224)    | 0.0000 | 0.1574                 | 0.3226(0.2652,0.38)       | 0.0000 | 0.1538                   | 0.3151(0.2576, 0.3727)    | 0.0000 | 0.1436                  | 0.2942(0.2358, 0.3526)    | 0.0000 | 0.1290                  | 0.2655(0.2045,0.3266)     | 0.0000 |
|       | Total effect     | -0.0145                | -0.1752(-0.5277, 0.1773)  | 0.3300 | -0.0612                | -0.7377(-1.086, -0.3894)  | 0.0000 | -0.0598                  | -0.7202(-1.0683, -0.3722) | 0.0001 | -0.0611                 | -0.7354(-1.084, -0.3869)  | 0.0000 | -0.0524                 | -0.632(-0.9832, -0.2807)  | 0.0004 |

Path1: Mediation effect of BMI on the relationship between age at menarche and DBP.  
 Path2: Mediation effect of BMI on the relationship between age at menarche and SBP.  
 Path3: Mediation effect of WC on the relationship between age at menarche and DBP.  
 Path4: Mediation effect of WC on the relationship between age at menarche and SBP.  
 Un-standardized: B, standardized coefficients,  $\beta$ .

<sup>a</sup>Unadjusted;  
<sup>b</sup>Adjusted for age, educational levels, marital status, place of residence;  
<sup>c</sup>Adjusted for age, educational levels, marital status, place of residence, cigarette smoking, alcohol habit, eating habit, social events, history of accidental injury, physical exercises habit;  
<sup>d</sup>Adjusted for age, educational levels, marital status, place of residence, cigarette smoking, alcohol habit, eating habit, social events, history of accidental injury, physical exercises habit, history of cardiovascular disease, hepatitis history, history of antilipidemic medication, history of antidiabetic medication;  
<sup>e</sup>Adjusted for age, educational levels, marital status, place of residence, cigarette smoking, alcohol habit, eating habit, social events, history of accidental injury, physical exercises habit, history of cardiovascular disease, hepatitis history, history of antilipidemic medication, history of antidiabetic medication, LDL Cholesterol, HDL Cholesterol, Triglycerides, HbA1c, serum creatinine, serum uric acid.

## DISCUSSION

In the study, we attempted to explore the association between age of menarche and blood pressure and examined the moderating and mediating effect of obesity parameters on the association. We have found that the interaction term of obesity parameters\*age of menarche was not significant for predicting BP. It was also important to note that WC and BMI partly mediated the relationship between age of menarche and BP. The results of our study were partly constant with most previous studies, even better than the previous studies. And so previous studies had only focus on the relationship between earlier biological maturation and health outcomes in late adolescence and adulthood. Most of the previous studies meant exactly that: earlier biological maturation was at a higher risk for health outcomes in late adolescence and adulthood. Furthermore, most previous studies found that early biological maturation (age of menarche) or puberty was significantly related to obesity parameters[31-35], hypertension[35-38], and metabolic syndrome[39-47]. In general, our results were mostly consistent with the results of previous studies that suggest that earlier biological maturation is a risk factor for several negative health outcomes in late adolescence and adulthood.

Our study suggested the likelihood of a dose-response relationship between age of menarche and obesity parameters (BMI and WC). The relationship could be identified by the fact that early-maturing girls already have more adiposity before menarche, given that fatty tissue, through leptin release, has a crucial role in the initiation of the biological maturation process[48-49]. Early maturing girls could maintain their higher fatty tissue in adulthood[50]. Another mechanism may also be associated with the time of the maturation process. It has been reported that early maturing girls could experience a more accelerated maturation process than late maturing ones. Thus, more significant interference with biological maturation in girls can lead to increased more fatty tissue[51]. We also found a significantly negative relationship between age at menarche and BP in mid-aged and elderly Chinese women. However, this association did not exist between the age of menarche and SBP before adjusting the related confounders. This result consistent with previous findings[52-60] regarding the age of menarche as a cardiovascular risk factor. The weak association between age at menarche and BP in adulthood could, in part, be explained by the fact that early matures were younger than women with late menarche. This result could be an expression of the fact that BP is an outcome with a higher latency period than obesity. Moreover, among women who already entered menopause in our study, the effects of menarche could be even weaker, as results suggest, and obesity could have more effect on BP. Therefore, obesity in childhood/adolescence,

1 sociodemographic, or even behavioral factors through life (including age, educational levels, marital  
2 status, place of residence, smoking habits, drinking habits, eating meals, social and leisure activities,  
3 the experience of a traumatic event, taking physical activity or exercise) were potential mediators  
4 to target when interventions for BP control and management.  
5  
6  
7

8  
9 Though so many studies have explored the association analysis between the age of menarche or  
10 obesity parameters and BP, there were only two studies[61 62] explored the mediating effect of  
11 obesity parameters on the relation between age of menarche and BP. Zhang L, Li Y, Zhou W, et al  
12 [61] found that The relationship between age of menarche and DBP was partly mediated by the  
13 obesity parameter. In contrast, the relationship was fully mediated by the obesity parameter in  
14 women. Werneck AO, Oyeyemi AL, Cyrino ES, et al [62] showed that women with late menarche are  
15 less likely to have a risk of hypertension, and BMI was an important mediator of the age at the  
16 menarche-hypertension association. The interactions term of obesity parameters\*age of menarche  
17 in the two studies were the same as our study. Interestingly, we found that obesity parameters  
18 partly mediated the relationship between age of menarche and BP in women. The difference  
19 between our research and others may due to the different population, different definitions of early  
20 and later menarche, and different confounding variables by controlling. The individuals in our study  
21 were mid-aged and elderly Chinese women, where the mean age at recruitment and age of  
22 menarche were older than in the Werneck AO, Oyeyemi AL, Cyrino ES, et al' s study, and the level  
23 of socio-economic development also made some contribution to ontogenetic development. In  
24 addition, other studies and a meta-analysis[52 54 60 63-65] reported an inverse association  
25 between early age of menarche and hypertension, which was not observed in Zhang L, Li Y, Zhou W,  
26 et al' study. They found no direct relationship between the age of menarche and hypertension, and  
27 we have found a direct relationship between age of menarche and BP. The participants were similar  
28 in China and its socio-economic background, this phenomenon could be explained by the cumulative  
29 effect, which showed a significantly negative association between age of menarche and BP over life-  
30 span.  
31  
32  
33  
34  
35  
36  
37  
38  
39  
40  
41  
42  
43  
44  
45  
46  
47  
48  
49  
50

51 In sum, the interaction term of obesity parameters\*age of menarche was not significant for  
52 predicting either DBP or SBP in women. Moreover, obesity parameters partly mediated the  
53 relationship between age of menarche and BP.  
54  
55  
56  
57  
58  
59  
60

## CONCLUSIONS

The interaction term of obesity parameters\*age of menarche was not significant for predicting either DBP or SBP in women. Moreover, Obesity parameters partly mediated the relationship between age of menarche and BP.

### Author affiliations

<sup>1</sup> Department of Internal Medicine Nursing, School of Nursing, Wannan Medical College, 22 Wenchang West Road, Higher Education Park, Wuhu City, An Hui Province, P.R.China

<sup>2</sup> Obstetrics and Gynecology Nursing, School of Nursing, Wannan Medical College, 22 Wenchang West Road, Higher Education Park, Wuhu City, An Hui Province, P.R.China

<sup>3</sup>Department of Pediatric Nursing, School of Nursing, Wannan Medical College, 22 Wenchang West Road, Higher Education Park, Wuhu City, An Hui Province, P.R.China

<sup>4</sup> Department of Surgical Nursing, School of Nursing, Wannan Medical College, 22 Wenchang West Road, Higher Education Park, Wuhu City, An Hui Province, P.R.China

<sup>5</sup>Department of Emergency and Critical Care Nursing, School of Nursing, Wannan Medical College, 22 Wenchang West Road, Higher Education Park, Wuhu City, An Hui Province, P.R.China

<sup>6</sup>Rehabilitation Nursing, School of Nursing, Wannan Medical college, 22 Wenchang West Road, Higher Education Park, Wuhu City, An Hui Province, P.R.China

<sup>7</sup>Department of nursing, Yijishan Hospital, the First Affiliated Hospital of Wannan Medical College, Zheshan West Road, Yijishan District, Wuhu City, Anhui Province

## Abbreviations

CHARLS, China Health and Retirement Longitudinal Study; World Health Organization, WHO; BMI, body mass index; waist circle, WC; BP, blood pressure; DBP, diastolic blood pressure; SBP, systolic blood pressure; SUA, serum uric acid; CVDs, cardiovascular diseases; M, mean; standard error, SE; unstandardized, B; standardized coefficients,  $\beta$ ; CDC, Centers for Disease Control and Prevention; Scr, serum creatinine; SD, standard deviation; LDL, low-density lipoprotein; Hemoglobin A1C, HbA1c; confidence intervals, CIs; HDL, high-density lipoprotein; estimated glomerular filtration rate, eGFR; fasting plasma glucose, FPG; NSFC, The National Natural Science Foundation of China; National Institute on Aging, NIA; World Bank, WB; urinalysis, UA.

## Acknowledgements

We thank the members of the research as well as all participants for their contribution.

## Author contributions

Conceived and designed the research: LZ. Wrote the paper: LZ. Analyzed the data: LZ. Revised the paper: LZ, L Y, C-z W, TY, Dm Z, H-h W, JL, Y-x L, LS, X-p L, YH, H-y C, and Y-z L.

## Funding

CHARLS was supported by the NSFC (70910107022, 71130002) and National Institute on Aging (R03-TW008358-01; R01-AG037031-03S1), and World Bank (7159234) and the Support Program for Outstanding Young Talents from the Universities and Colleges of Anhui Province for Lin Zhang.

## Disclosure

All authors report no potential conflict of interest relevant to the research.

## Patient consent

Completion of all authors declaration and consent to publish form is required.

## Ethics approval and consent to participate

All data are openly published as microdata at <http://charls.pku.edu.cn/index/zh-cn.html> with no direct contact with all participants.



## Data sharing

Data sharing statement Extra data can be accessed via <http://charls.pku.edu.cn/index/zh-cn.html>.

## References

1. Tian S, Xu Y, Dong H. The effect of metabolic health and obesity phenotypes on risk of hypertension: A nationwide population-based study using 5 representative definitions of metabolic health. *Medicine (Baltimore)* 2018;**97**(38):e12425 doi: 10.1097/MD.00000000000012425[published Online First: Epub Date]].
2. Abdulsalam S, Olugbenga-Bello A, Olarewaju O, et al. Sociodemographic correlates of modifiable risk factors for hypertension in a rural local government area of oyo state South west Nigeria. *Int J Hypertens* 2014;**2014**:842028 doi: 10.1155/2014/842028[published Online First: Epub Date]].
3. Ke L, Ho J, Feng J, et al. Modifiable risk factors including sunlight exposure and fish consumption are associated with risk of hypertension in a large representative population from Macau. *J Steroid Biochem Mol Biol* 2014;**144 Pt A**:152-5 doi: 10.1016/j.jsbmb.2013.10.019[published Online First: Epub Date]].
4. Ibekwe R. Modifiable Risk factors of Hypertension and Socio-demographic Profile in Oghara, Delta State; Prevalence and Correlates. *Ann Med Health Sci Res* 2015;**5**(1):71-7 doi: 10.4103/2141-9248.149793[published Online First: Epub Date]].
5. Pilakkadavath Z, Shaffi M. Modifiable risk factors of hypertension: A hospital-based case-control study from Kerala, India. *J Family Med Prim Care* 2016;**5**(1):114-9 doi: 10.4103/2249-4863.184634[published Online First: Epub Date]].
6. Mamudu HM, Paul TK, Wang L, et al. Association Between Multiple Modifiable Risk Factors of Cardiovascular Disease and Hypertension among Asymptomatic Patients in Central Appalachia. *South Med J* 2017;**110**(2):90-96 doi: 10.14423/SMJ.0000000000000602[published Online First: Epub Date]].
7. Collaboration NCDRF. Worldwide trends in blood pressure from 1975 to 2015: a pooled analysis of 1479 population-based measurement studies with 19.1 million participants. *Lancet* 2017;**389**(10064):37-55 doi: 10.1016/S0140-6736(16)31919-5[published Online First: Epub Date]].
8. Bromfield S, Muntner P. High blood pressure: the leading global burden of disease risk factor and the need for worldwide prevention programs. *Curr Hypertens Rep* 2013;**15**(3):134-6 doi: 10.1007/s11906-013-0340-9[published Online First: Epub Date]].
9. Mahajan S, Zhang D, He S, et al. Prevalence, Awareness, and Treatment of Isolated Diastolic Hypertension: Insights From the China PEACE Million Persons Project. *J Am Heart Assoc* 2019;**8**(19):e012954 doi: 10.1161/JAHA.119.012954[published Online First: Epub Date]].
10. Cloutier L, Morris D, Bruneau J, et al. World Health Organization celebrates World Health Day, April 7, 2013--focusing on hypertension. *Canadian journal of cardiovascular nursing = Journal canadien en soins infirmiers cardio-vasculaires* 2013;**23**(2):9-11
11. Webb MS. Stress management strategies in hypertension control. *Ethnicity & disease* 2002;**12**(4):S3-95-100
12. Kotchen TA. The search for strategies to control hypertension. *Circulation* 2010;**122**(12):1141-3 doi: 10.1161/CIRCULATIONAHA.110.978759[published Online First: Epub Date]].
13. Mancia G, Rea F, Cuspidi C, et al. Blood pressure control in hypertension. Pros and cons of available treatment strategies. *Journal of hypertension* 2017;**35**(2):225-33 doi: 10.1097/HJH.0000000000001181[published Online First: Epub Date]].
14. Werneck AO, Silva DR, Souza MF, et al. Correlates of Blood Pressure According to Early, On Time, and Late Maturation in Adolescents. *Journal of clinical hypertension* 2016;**18**(5):424-30 doi: 10.1111/jch.12699[published Online First: Epub Date]].
15. Widen E, Silventoinen K, Sovio U, et al. Pubertal timing and growth influences cardiometabolic risk factors in adult

- 1 males and females. *Diabetes care* 2012;**35**(4):850-6 doi: 10.2337/dc11-1365[published Online First: Epub  
2 Date]].
- 3  
4 16. Mueller NT, Duncan BB, Barreto SM, et al. Earlier age at menarche is associated with higher diabetes risk and  
5 cardiometabolic disease risk factors in Brazilian adults: Brazilian Longitudinal Study of Adult Health (ELSA-  
6 Brasil). *Cardiovasc Diabetol* 2014;**13**:22 doi: 10.1186/1475-2840-13-22[published Online First: Epub Date]].
- 7  
8 17. Dreyfus J, Jacobs DR, Jr., Mueller N, et al. Age at Menarche and Cardiometabolic Risk in Adulthood: The Coronary  
9 Artery Risk Development in Young Adults Study. *J Pediatr* 2015;**167**(2):344-52 e1 doi:  
10 10.1016/j.jpeds.2015.04.032[published Online First: Epub Date]].
- 11  
12 18. Cao M, Cui B. Negative Effects of Age at Menarche on Risk of Cardiometabolic Diseases in Adulthood: A Mendelian  
13 Randomization Study. *The Journal of clinical endocrinology and metabolism* 2020;**105**(2) doi:  
14 10.1210/clinem/dgz071[published Online First: Epub Date]].
- 15  
16 19. Power C, Lake JK, Cole TJ. Body mass index and height from childhood to adulthood in the 1958 British born cohort.  
17 *The American journal of clinical nutrition* 1997;**66**(5):1094-101 doi: 10.1093/ajcn/66.5.1094[published Online  
18 First: Epub Date]].
- 19  
20 20. Adair LS, Gordon-Larsen P. Maturation timing and overweight prevalence in US adolescent girls. *American journal*  
21 *of public health* 2001;**91**(4):642-4 doi: 10.2105/ajph.91.4.642[published Online First: Epub Date]].
- 22  
23 21. Must A, Naumova EN, Phillips SM, et al. Childhood overweight and maturational timing in the development of adult  
24 overweight and fatness: the Newton Girls Study and its follow-up. *Pediatrics* 2005;**116**(3):620-7 doi:  
25 10.1542/peds.2004-1604[published Online First: Epub Date]].
- 26  
27 22. Li C, Liu T, Sun W, et al. Prevalence and risk factors of arthritis in a middle-aged and older Chinese population: the  
28 China health and retirement longitudinal study. *Rheumatology* 2015;**54**(4):697-706 doi:  
29 10.1093/rheumatology/keu391[published Online First: Epub Date]].
- 30  
31 23. Zhang L, Liu K, Li H, et al. Relationship between body mass index and depressive symptoms: the "fat and jolly"  
32 hypothesis for the middle-aged and elderly in China. *BMC public health* 2016;**16**(1):1201 doi: 10.1186/s12889-  
33 016-3864-5[published Online First: Epub Date]].
- 34  
35 24. Zhang L, Li JL, Zhang LL, et al. Association and Interaction Analysis of Body Mass Index and Triglycerides Level with  
36 Blood Pressure in Elderly Individuals in China. *BioMed research international* 2018;**2018**:8934534 doi:  
37 10.1155/2018/8934534[published Online First: Epub Date]].
- 38  
39 25. Zhang L, Li JL, Zhang LL, et al. No association between C-reactive protein and depressive symptoms among the  
40 middle-aged and elderly in China Evidence from the China Health and Retirement Longitudinal Study. *Medicine*  
41 2018;**97**(38) doi: ARTN e12352  
42 10.1097/MD.000000000012352[published Online First: Epub Date]].
- 43  
44 26. Zhang L, Li JL, Zhang LL, et al. Relationship between adiposity parameters and cognition: the "fat and jolly" hypothesis  
45 in middle-aged and elderly people in China. *Medicine* 2019;**98**(10) doi: ARTN e14747  
46 10.1097/MD.000000000014747[published Online First: Epub Date]].
- 47  
48 27. Zhang L, Li JL, Zhang LL, et al. Body mass index and serum uric acid level: Individual and combined effects on blood  
49 pressure in middle-aged and older individuals in China. *Medicine (Baltimore)* 2020;**99**(9):e19418 doi:  
50 10.1097/MD.000000000019418[published Online First: Epub Date]].
- 51  
52 28. Hayes AF, Preacher KJ. Quantifying and Testing Indirect Effects in Simple Mediation Models When the Constituent  
53 Paths Are Nonlinear. *Multivariate Behav Res* 2010;**45**(4):627-60 doi:  
54 10.1080/00273171.2010.498290[published Online First: Epub Date]].
- 55  
56 29. Hayes AF, Preacher KJ. Statistical mediation analysis with a multicategorical independent variable. *Br J Math Stat*  
57 *Psychol* 2014;**67**(3):451-70 doi: 10.1111/bmsp.12028[published Online First: Epub Date]].
- 58  
59 30. Hayes AF. An Index and Test of Linear Moderated Mediation. *Multivariate Behav Res* 2015;**50**(1):1-22 doi:  
60 10.1080/00273171.2014.962683[published Online First: Epub Date]].
31. Shrestha A, Olsen J, Ramlau-Hansen CH, et al. Obesity and age at menarche. *Fertil Steril* 2011;**95**(8):2732-4 doi:

- 10.1016/j.fertnstert.2011.02.020[published Online First: Epub Date]].
32. Bralic I, Tahirovic H, Matanic D, et al. Association of early menarche age and overweight/obesity. *J Pediatr Endocrinol Metab* 2012;**25**(1-2):57-62 doi: 10.1515/jpem-2011-0277[published Online First: Epub Date]].
33. Leitao RB, Rodrigues LP, Neves L, et al. Development of adiposity, obesity and age at menarche: an 8-year follow-up study in Portuguese schoolgirls. *International journal of adolescent medicine and health* 2013;**25**(1):55-63 doi: 10.1515/ijamh-2013-0007[published Online First: Epub Date]].
34. Gallicchio L, Flaws JA, Smith RL. Age at menarche, androgen concentrations, and midlife obesity: findings from the Midlife Women's Health Study. *Menopause* 2016;**23**(11):1182-88 doi: 10.1097/GME.0000000000000691[published Online First: Epub Date]].
35. Liu G, Yang Y, Huang W, et al. Association of age at menarche with obesity and hypertension among southwestern Chinese women: a new finding. *Menopause* 2018;**25**(5):546-53 doi: 10.1097/GME.0000000000001027[published Online First: Epub Date]].
36. Zhou W, Wang T, Zhu L, et al. Association between Age at Menarche and Hypertension among Females in Southern China: A Cross-Sectional Study. *Int J Hypertens* 2019;**2019**:9473182 doi: 10.1155/2019/9473182[published Online First: Epub Date]].
37. Shen L, Wang L, Hu Y, et al. Associations of the ages at menarche and menopause with blood pressure and hypertension among middle-aged and older Chinese women: a cross-sectional analysis of the baseline data of the China Health and Retirement Longitudinal Study. *Hypertension research : official journal of the Japanese Society of Hypertension* 2019;**42**(5):730-38 doi: 10.1038/s41440-019-0235-5[published Online First: Epub Date]].
38. Guo L, Peng C, Xu H, et al. Age at menarche and prevention of hypertension through lifestyle in young Chinese adult women: result from project ELEFANT. *BMC Womens Health* 2018;**18**(1):182 doi: 10.1186/s12905-018-0677-y[published Online First: Epub Date]].
39. Stockl D, Meisinger C, Peters A, et al. Age at menarche and its association with the metabolic syndrome and its components: results from the KORA F4 study. *PloS one* 2011;**6**(10):e26076 doi: 10.1371/journal.pone.0026076[published Online First: Epub Date]].
40. Chang CJ, Lai MM, Lin CC, et al. Age at menarche and its association with the metabolic syndrome in Taiwan. *Obesity research & clinical practice* 2016;**10 Suppl 1**:S26-S34 doi: 10.1016/j.orcp.2015.10.003[published Online First: Epub Date]].
41. Heys M, Schooling CM, Jiang C, et al. Age of menarche and the metabolic syndrome in China. *Epidemiology* 2007;**18**(6):740-6 doi: 10.1097/EDE.0b013e3181567faf[published Online First: Epub Date]].
42. Yoo S, Hwang YS. Age-Group Related Cohort Effects on the Association between Age at Menarche and Metabolic Syndrome among Korean Premenopausal Women. *Korean journal of family medicine* 2019;**40**(4):280-81 doi: 10.4082/kjfm.19.0045[published Online First: Epub Date]].
43. Akter S, Jesmin S, Islam M, et al. Association of age at menarche with metabolic syndrome and its components in rural Bangladeshi women. *Nutr Metab (Lond)* 2012;**9**(1):99 doi: 10.1186/1743-7075-9-99[published Online First: Epub Date]].
44. Glueck CJ, Morrison JA, Wang P, et al. Early and late menarche are associated with oligomenorrhea and predict metabolic syndrome 26 years later. *Metabolism: clinical and experimental* 2013;**62**(11):1597-606 doi: 10.1016/j.metabol.2013.07.005[published Online First: Epub Date]].
45. Kim Y, Je Y. Early Menarche and Risk of Metabolic Syndrome: A Systematic Review and Meta-Analysis. *Journal of women's health* 2019;**28**(1):77-86 doi: 10.1089/jwh.2018.6998[published Online First: Epub Date]].
46. Farahmand M, Ramezani Tehrani F, Behboudi Gandevani S, et al. Is There any Association between Age at Menarche and Risk of Metabolic Syndrome? The Tehran Lipid & Glucose Study. *Arch Iran Med* 2019;**22**(9):495-500
47. Hwang YS, Park EJ, Choi JG, et al. Relationship between Age at Menarche and Metabolic Syndrome in Premenopausal Women: Korea National Health and Nutrition Examination Survey 2013-2014. *Korean journal of family*

- 1 medicine 2018;**39**(5):300-06 doi: 10.4082/kjfm.17.0022[published Online First: Epub Date]].
- 2 48. Ahmed ML, Ong KK, Dunger DB. Childhood obesity and the timing of puberty. Trends Endocrinol Metab  
3 2009;**20**(5):237-42 doi: 10.1016/j.tem.2009.02.004[published Online First: Epub Date]].
- 4 49. Jasik CB, Lustig RH. Adolescent obesity and puberty: the "perfect storm". Ann N Y Acad Sci 2008;**1135**:265-79 doi:  
5 10.1196/annals.1429.009[published Online First: Epub Date]].
- 6 50. Garn SM. Continuities and changes in fatness from infancy through adulthood. Curr Probl Pediatr 1985;**15**(2):1-47  
7 doi: 10.1016/0045-9380(85)90015-5[published Online First: Epub Date]].
- 8 51. van Lenthe FJ, Kemper CG, van Mechelen W. Rapid maturation in adolescence results in greater obesity in adulthood:  
9 the Amsterdam Growth and Health Study. The American journal of clinical nutrition 1996;**64**(1):18-24 doi:  
10 10.1093/ajcn/64.1.18[published Online First: Epub Date]].
- 11 52. Remsberg KE, Demerath EW, Schubert CM, et al. Early menarche and the development of cardiovascular disease risk  
12 factors in adolescent girls: the Fels Longitudinal Study. The Journal of clinical endocrinology and metabolism  
13 2005;**90**(5):2718-24 doi: 10.1210/jc.2004-1991[published Online First: Epub Date]].
- 14 53. Feng Y, Hong X, Wilker E, et al. Effects of age at menarche, reproductive years, and menopause on metabolic risk  
15 factors for cardiovascular diseases. Atherosclerosis 2008;**196**(2):590-7 doi:  
16 10.1016/j.atherosclerosis.2007.06.016[published Online First: Epub Date]].
- 17 54. Won JC, Hong JW, Noh JH, et al. Association Between Age at Menarche and Risk Factors for Cardiovascular Diseases  
18 in Korean Women: The 2010 to 2013 Korea National Health and Nutrition Examination Survey. Medicine  
19 (Baltimore) 2016;**95**(18):e3580 doi: 10.1097/MD.0000000000003580[published Online First: Epub Date]].
- 20 55. Au Yeung SL, Jiang C, Cheng KK, et al. Age at menarche and cardiovascular risk factors using Mendelian randomization  
21 in the Guangzhou Biobank Cohort Study. Preventive medicine 2017;**101**:142-48 doi:  
22 10.1016/j.ypmed.2017.06.006[published Online First: Epub Date]].
- 23 56. Ley SH, Li Y, Tobias DK, et al. Duration of Reproductive Life Span, Age at Menarche, and Age at Menopause Are  
24 Associated With Risk of Cardiovascular Disease in Women. J Am Heart Assoc 2017;**6**(11) doi:  
25 10.1161/JAHA.117.006713[published Online First: Epub Date]].
- 26 57. Luijken J, van der Schouw YT, Mensink D, et al. Association between age at menarche and cardiovascular disease: A  
27 systematic review on risk and potential mechanisms. Maturitas 2017;**104**:96-116 doi:  
28 10.1016/j.maturitas.2017.07.009[published Online First: Epub Date]].
- 29 58. Yang L, Li L, Millwood IY, et al. Age at menarche and risk of major cardiovascular diseases: Evidence of birth cohort  
30 effects from a prospective study of 300,000 Chinese women. International journal of cardiology 2017;**227**:497-  
31 502 doi: 10.1016/j.ijcard.2016.10.115[published Online First: Epub Date]].
- 32 59. Chen X, Liu Y, Sun X, et al. Age at menarche and risk of all-cause and cardiovascular mortality: a systematic review  
33 and dose-response meta-analysis. Menopause 2018;**26**(6):670-76 doi:  
34 10.1097/GME.0000000000001289[published Online First: Epub Date]].
- 35 60. Lee JJ, Cook-Wiens G, Johnson BD, et al. Age at Menarche and Risk of Cardiovascular Disease Outcomes: Findings  
36 From the National Heart Lung and Blood Institute-Sponsored Women's Ischemia Syndrome Evaluation. J Am  
37 Heart Assoc 2019;**8**(12):e012406 doi: 10.1161/JAHA.119.012406[published Online First: Epub Date]].
- 38 61. Zhang L, Li Y, Zhou W, et al. Mediation effect of BMI on the relationship between age at menarche and hypertension:  
39 The Henan Rural Cohort Study. Journal of human hypertension 2019 doi: 10.1038/s41371-019-0247-  
40 2[published Online First: Epub Date]].
- 41 62. Werneck AO, Oyeyemi AL, Cyrino ES, et al. Association between age at menarche and blood pressure in adulthood:  
42 is obesity an important mediator? Hypertension research : official journal of the Japanese Society of  
43 Hypertension 2018;**41**(10):856-64 doi: 10.1038/s41440-018-0079-4[published Online First: Epub Date]].
- 44 63. Lakshman R, Forouhi NG, Sharp SJ, et al. Early age at menarche associated with cardiovascular disease and mortality.  
45 The Journal of clinical endocrinology and metabolism 2009;**94**(12):4953-60 doi: 10.1210/jc.2009-  
46 1789[published Online First: Epub Date]].
- 47  
48  
49  
50  
51  
52  
53  
54  
55  
56  
57  
58  
59  
60

- 1 64. Charalampopoulos D, McLoughlin A, Elks CE, et al. Age at menarche and risks of all-cause and cardiovascular death:  
2 a systematic review and meta-analysis. American journal of epidemiology 2014;**180**(1):29-40 doi:  
3 10.1093/aje/kwu113[published Online First: Epub Date]}.  
4  
5 65. Zheng Y, Zhang G, Chen Z, et al. Association between Age at Menarche and Cardiovascular Disease Risk Factors in  
6 China: A Large Population-Based Investigation. Cardiorenal Med 2016;**6**(4):307-16 doi:  
7 10.1159/000445506[published Online First: Epub Date]}.  
8  
9  
10  
11  
12  
13  
14  
15  
16  
17  
18  
19  
20  
21  
22  
23  
24  
25  
26  
27  
28  
29  
30  
31  
32  
33  
34  
35  
36  
37  
38  
39  
40  
41  
42  
43  
44  
45  
46  
47  
48  
49  
50  
51  
52  
53  
54  
55  
56  
57  
58  
59  
60

For peer review only

**STROBE 2007 (v4) Statement—Checklist of items that should be included in reports of *cross-sectional studies***

| Section/Topic                | Item # | Recommendation                                                                                                                                                                       | Reported on page # |
|------------------------------|--------|--------------------------------------------------------------------------------------------------------------------------------------------------------------------------------------|--------------------|
| <b>Title and abstract</b>    | 1      | (a) Indicate the study's design with a commonly used term in the title or the abstract                                                                                               | 1                  |
|                              |        | (b) Provide in the abstract an informative and balanced summary of what was done and what was found                                                                                  | 2-3                |
| <b>Introduction</b>          |        |                                                                                                                                                                                      |                    |
| Background/rationale         | 2      | Explain the scientific background and rationale for the investigation being reported                                                                                                 | 4-5                |
| Objectives                   | 3      | State specific objectives, including any prespecified hypotheses                                                                                                                     | 5                  |
| <b>Methods</b>               |        |                                                                                                                                                                                      |                    |
| Study design                 | 4      | Present key elements of study design early in the paper                                                                                                                              | 6                  |
| Setting                      | 5      | Describe the setting, locations, and relevant dates, including periods of recruitment, exposure, follow-up, and data collection                                                      | 6                  |
| Participants                 | 6      | (a) Give the eligibility criteria, and the sources and methods of selection of participants                                                                                          | 7                  |
| Variables                    | 7      | Clearly define all outcomes, exposures, predictors, potential confounders, and effect modifiers. Give diagnostic criteria, if applicable                                             | 7-8                |
| Data sources/<br>measurement | 8*     | For each variable of interest, give sources of data and details of methods of assessment (measurement). Describe comparability of assessment methods if there is more than one group | 8                  |
| Bias                         | 9      | Describe any efforts to address potential sources of bias                                                                                                                            | 8                  |
| Study size                   | 10     | Explain how the study size was arrived at                                                                                                                                            | 7                  |
| Quantitative variables       | 11     | Explain how quantitative variables were handled in the analyses. If applicable, describe which groupings were chosen and why                                                         | 7                  |
| Statistical methods          | 12     | (a) Describe all statistical methods, including those used to control for confounding                                                                                                | 7-8                |
|                              |        | (b) Describe any methods used to examine subgroups and interactions                                                                                                                  | 7-8                |
|                              |        | (c) Explain how missing data were addressed                                                                                                                                          | 7-8                |
|                              |        | (d) If applicable, describe analytical methods taking account of sampling strategy                                                                                                   | 7-8                |
|                              |        | (e) Describe any sensitivity analyses                                                                                                                                                | 7-8                |
| <b>Results</b>               |        |                                                                                                                                                                                      |                    |



|                          |     |                                                                                                                                                                                                              |       |
|--------------------------|-----|--------------------------------------------------------------------------------------------------------------------------------------------------------------------------------------------------------------|-------|
| Participants             | 13* | (a) Report numbers of individuals at each stage of study—eg numbers potentially eligible, examined for eligibility, confirmed eligible, included in the study, completing follow-up, and analysed            | 9-10  |
|                          |     | (b) Give reasons for non-participation at each stage                                                                                                                                                         | 9-10  |
|                          |     | (c) Consider use of a flow diagram                                                                                                                                                                           | 9-10  |
| Descriptive data         | 14* | (a) Give characteristics of study participants (eg demographic, clinical, social) and information on exposures and potential confounders                                                                     | 10-13 |
|                          |     | (b) Indicate number of participants with missing data for each variable of interest                                                                                                                          | 10-13 |
| Outcome data             | 15* | Report numbers of outcome events or summary measures                                                                                                                                                         | 10-13 |
| Main results             | 16  | (a) Give unadjusted estimates and, if applicable, confounder-adjusted estimates and their precision (eg, 95% confidence interval). Make clear which confounders were adjusted for and why they were included | 13-16 |
|                          |     | (b) Report category boundaries when continuous variables were categorized                                                                                                                                    | 13-16 |
|                          |     | (c) If relevant, consider translating estimates of relative risk into absolute risk for a meaningful time period                                                                                             | 13-16 |
| Other analyses           | 17  | Report other analyses done—eg analyses of subgroups and interactions, and sensitivity analyses                                                                                                               |       |
| <b>Discussion</b>        |     |                                                                                                                                                                                                              |       |
| Key results              | 18  | Summarise key results with reference to study objectives                                                                                                                                                     | 17-19 |
| Limitations              | 19  | Discuss limitations of the study, taking into account sources of potential bias or imprecision. Discuss both direction and magnitude of any potential bias                                                   | 17-19 |
| Interpretation           | 20  | Give a cautious overall interpretation of results considering objectives, limitations, multiplicity of analyses, results from similar studies, and other relevant evidence                                   | 17-19 |
| Generalisability         | 21  | Discuss the generalisability (external validity) of the study results                                                                                                                                        | 17-19 |
| <b>Other information</b> |     |                                                                                                                                                                                                              |       |
| Funding                  | 22  | Give the source of funding and the role of the funders for the present study and, if applicable, for the original study on which the present article is based                                                | 20    |

\*Give information separately for cases and controls in case-control studies and, if applicable, for exposed and unexposed groups in cohort and cross-sectional studies.

**Note:** An Explanation and Elaboration article discusses each checklist item and gives methodological background and published examples of transparent reporting. The STROBE checklist is best used in conjunction with this article (freely available on the Web sites of PLoS Medicine at <http://www.plosmedicine.org/>, Annals of Internal Medicine at <http://www.annals.org/>, and Epidemiology at <http://www.epidem.com/>). Information on the STROBE Initiative is available at [www.strobe-statement.org](http://www.strobe-statement.org).

# BMJ Open

## Mediator or moderator? The role of obesity in the association between age at menarche and blood pressure in mid-aged and elderly Chinese: a population-based cross-sectional study

|                               |                                                                                                                                                                                                                                                                                                                                                                                                                                                                                                                                                                                                                                                                                                                                                                                                                                                                                                                                                                                                                                                                                                                                                                                                                                                                                                                                                                                                                                                                                                                                                                                                                                                                                                                                                                                                                                                                                                                                                                                                                                                                                                                                                                                                                                                                                                                                                                                                                                                                                                                                             |
|-------------------------------|---------------------------------------------------------------------------------------------------------------------------------------------------------------------------------------------------------------------------------------------------------------------------------------------------------------------------------------------------------------------------------------------------------------------------------------------------------------------------------------------------------------------------------------------------------------------------------------------------------------------------------------------------------------------------------------------------------------------------------------------------------------------------------------------------------------------------------------------------------------------------------------------------------------------------------------------------------------------------------------------------------------------------------------------------------------------------------------------------------------------------------------------------------------------------------------------------------------------------------------------------------------------------------------------------------------------------------------------------------------------------------------------------------------------------------------------------------------------------------------------------------------------------------------------------------------------------------------------------------------------------------------------------------------------------------------------------------------------------------------------------------------------------------------------------------------------------------------------------------------------------------------------------------------------------------------------------------------------------------------------------------------------------------------------------------------------------------------------------------------------------------------------------------------------------------------------------------------------------------------------------------------------------------------------------------------------------------------------------------------------------------------------------------------------------------------------------------------------------------------------------------------------------------------------|
| Journal:                      | <i>BMJ Open</i>                                                                                                                                                                                                                                                                                                                                                                                                                                                                                                                                                                                                                                                                                                                                                                                                                                                                                                                                                                                                                                                                                                                                                                                                                                                                                                                                                                                                                                                                                                                                                                                                                                                                                                                                                                                                                                                                                                                                                                                                                                                                                                                                                                                                                                                                                                                                                                                                                                                                                                                             |
| Manuscript ID                 | bmjopen-2021-051486.R1                                                                                                                                                                                                                                                                                                                                                                                                                                                                                                                                                                                                                                                                                                                                                                                                                                                                                                                                                                                                                                                                                                                                                                                                                                                                                                                                                                                                                                                                                                                                                                                                                                                                                                                                                                                                                                                                                                                                                                                                                                                                                                                                                                                                                                                                                                                                                                                                                                                                                                                      |
| Article Type:                 | Original research                                                                                                                                                                                                                                                                                                                                                                                                                                                                                                                                                                                                                                                                                                                                                                                                                                                                                                                                                                                                                                                                                                                                                                                                                                                                                                                                                                                                                                                                                                                                                                                                                                                                                                                                                                                                                                                                                                                                                                                                                                                                                                                                                                                                                                                                                                                                                                                                                                                                                                                           |
| Date Submitted by the Author: | 07-Dec-2021                                                                                                                                                                                                                                                                                                                                                                                                                                                                                                                                                                                                                                                                                                                                                                                                                                                                                                                                                                                                                                                                                                                                                                                                                                                                                                                                                                                                                                                                                                                                                                                                                                                                                                                                                                                                                                                                                                                                                                                                                                                                                                                                                                                                                                                                                                                                                                                                                                                                                                                                 |
| Complete List of Authors:     | <p>zhang, lin; Wannan Medical College, Department of Internal Medicine Nursing, School of Nursing, Wannan Medical College, 22 Wenchang West Road, Higher Education Park, Wuhu City, An Hui Province, P.R.China</p> <p>Yang, Liu; Wannan Medical College, Department of Internal Medicine Nursing, School of Nursing, Wannan Medical College, 22 Wenchang West Road, Higher Education Park, Wuhu City, An Hui Province, P.R.China</p> <p>Wang, Congzhi; Wannan Medical College, Department of Internal Medicine Nursing, School of Nursing, Wannan Medical College, 22 Wenchang West Road, Higher Education Park, Wuhu City, An Hui Province, P.R.China</p> <p>Yuan, Ting; Wannan Medical College, Obstetrics and Gynecology Nursing, School of Nursing, Wannan Medical College, 22 Wenchang West Road, Higher Education Park, Wuhu City, An Hui Province, P.R.China</p> <p>Zhang, Dongmei; Wannan Medical College, Department of Pediatric Nursing, School of Nursing, Wannan Medical College, 22 Wenchang West Road, Higher Education Park, Wuhu City, An Hui Province, P.R.China</p> <p>Wei, Huanhuan; Wannan Medical College, Obstetrics and Gynecology Nursing, School of Nursing, Wannan Medical College, 22 Wenchang West Road, Higher Education Park, Wuhu City, An Hui Province, P.R.China</p> <p>Li, Jing; Wannan Medical College, Department of Surgical Nursing, School of Nursing, Wannan Medical College, 22 Wenchang West Road, Higher Education Park, Wuhu City, An Hui Province, P.R.China</p> <p>Lei, Yunxiao; Wannan Medical College, Obstetrics and Gynecology Nursing, School of Nursing, Wannan Medical College, 22 Wenchang West Road, Higher Education Park, Wuhu City, An Hui Province, P.R.China;</p> <p>Henan University of Science and Technology, School of Nursing</p> <p>Sun, Lu; Wannan Medical College, Department of Emergency and Critical Care Nursing, School of Nursing, Wannan Medical College, 22 Wenchang West Road, Higher Education Park, Wuhu City, An Hui Province, P.R.China</p> <p>Li, Xiaoping; Wannan Medical College, Department of Emergency and Critical Care Nursing, School of Nursing, Wannan Medical College, 22 Wenchang West Road, Higher Education Park, Wuhu City, An Hui Province, P.R.China</p> <p>Hua, Ying; Wannan Medical College, Rehabilitation Nursing, School of Nursing, Wannan Medical College, 22 Wenchang West Road, Higher Education Park, Wuhu City, An Hui Province, P.R.China</p> <p>Che, Hengying; Yijishan Hospital of Wannan Medical College, Department</p> |



|                                    |                                                                                                                                                                                                                                                                                                                                                                                    |
|------------------------------------|------------------------------------------------------------------------------------------------------------------------------------------------------------------------------------------------------------------------------------------------------------------------------------------------------------------------------------------------------------------------------------|
|                                    | of nursing, Yijishan Hospital, the First Affiliated Hospital of Wannan Medical College, Zheshan West Road, Yijishan District, Wuhu City, Anhui Province<br>Li, Yuanzhen; Wannan Medical College, Department of Emergency and Critical Care Nursing, School of Nursing, Wannan Medical College, 22 Wenchang West Road, Higher Education Park, Wuhu City, An Hui Province, P.R.China |
| <b>Primary Subject Heading</b> :   | Geriatric medicine                                                                                                                                                                                                                                                                                                                                                                 |
| <b>Secondary Subject Heading</b> : | Public health                                                                                                                                                                                                                                                                                                                                                                      |
| <b>Keywords</b> :                  | Hypertension < CARDIOLOGY, Risk management < HEALTH SERVICES ADMINISTRATION & MANAGEMENT, Nutrition < TROPICAL MEDICINE                                                                                                                                                                                                                                                            |
|                                    |                                                                                                                                                                                                                                                                                                                                                                                    |

SCHOLARONE™  
Manuscripts

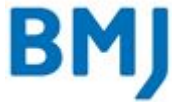

I, the Submitting Author has the right to grant and does grant on behalf of all authors of the Work (as defined in the below author licence), an exclusive licence and/or a non-exclusive licence for contributions from authors who are: i) UK Crown employees; ii) where BMJ has agreed a CC-BY licence shall apply, and/or iii) in accordance with the terms applicable for US Federal Government officers or employees acting as part of their official duties; on a worldwide, perpetual, irrevocable, royalty-free basis to BMJ Publishing Group Ltd ("BMJ") its licensees and where the relevant Journal is co-owned by BMJ to the co-owners of the Journal, to publish the Work in this journal and any other BMJ products and to exploit all rights, as set out in our [licence](#).

The Submitting Author accepts and understands that any supply made under these terms is made by BMJ to the Submitting Author unless you are acting as an employee on behalf of your employer or a postgraduate student of an affiliated institution which is paying any applicable article publishing charge ("APC") for Open Access articles. Where the Submitting Author wishes to make the Work available on an Open Access basis (and intends to pay the relevant APC), the terms of reuse of such Open Access shall be governed by a Creative Commons licence – details of these licences and which [Creative Commons](#) licence will apply to this Work are set out in our licence referred to above.

Other than as permitted in any relevant BMJ Author's Self Archiving Policies, I confirm this Work has not been accepted for publication elsewhere, is not being considered for publication elsewhere and does not duplicate material already published. I confirm all authors consent to publication of this Work and authorise the granting of this licence.

**Mediator or moderator? The role of obesity in the association between age at menarche and blood pressure in mid-aged and elderly Chinese: a population-based cross-sectional study**

Lin Zhang<sup>1</sup>, Liu Yang<sup>1</sup>, Congzhi Wang<sup>1</sup>, Ting Yuan<sup>2</sup>, Dongmei Zhang<sup>3</sup>, Huanhuan Wei<sup>2</sup>, Jing Li<sup>4</sup>, Yunxiao Lei<sup>2</sup>, Lu Sun<sup>5</sup>, Xiaoping Li<sup>5</sup>, Ying Hua<sup>6</sup>, Hengying Che<sup>7\*</sup>, Yuanzhen Li<sup>5\*</sup>

\*Correspondence: Hengying Che: 2722659079@qq.com and Yuanzhen Li: yuanzhen.li@wnmc.edu.cn

Yuanzhen Li and Hengying Che contributed equally to this work.

Lin Zhang: yaoran2008@163.com

Liu Yang: zqzqylyl5858@163.com

Congzhi Wang: 289957420@qq.com

Ting Yuan: yuanting@wnmc.edu.cn

Dongmei Zhang: dongmei.0715@163.com

Huanhuan Wei: whh0702@163.com

Jing Li: 475366616@qq.com

Yunxiao Lei: lyxheart@163.com

Lu Sun: 565196200@qq.com

Xiaoping Li: 349274808@qq.com

Ying Hua: 1542997737@qq.com

Hengying Che: 2722659079@qq.com

Yuanzhen Li: yuanzhen.li@wnmc.edu.cn

<sup>1</sup> Department of Internal Medicine Nursing, School of Nursing, Wannan Medical College, 22 Wenchang West Road, Higher Education Park, Wuhu City, An Hui Province, P.R.China

<sup>2</sup> Obstetrics and Gynecology Nursing, School of Nursing, Wannan Medical College, 22 Wenchang West Road, Higher Education Park, Wuhu City, An Hui Province, P.R.China

<sup>3</sup> Department of Pediatric Nursing, School of Nursing, Wannan Medical College, 22 Wenchang West Road, Higher Education Park, Wuhu City, An Hui Province, P.R.China

<sup>4</sup> Department of Surgical Nursing, School of Nursing, Wannan Medical College, 22 Wenchang West Road, Higher Education Park, Wuhu City, An Hui Province, P.R.China

<sup>5</sup> Department of Emergency and Critical Care Nursing, School of Nursing, Wannan Medical College, 22 Wenchang West Road, Higher Education Park, Wuhu City, An Hui Province, P.R.China

<sup>6</sup> Rehabilitation Nursing, School of Nursing, Wannan Medical College, 22 Wenchang West Road, Higher Education Park, Wuhu City, An Hui Province, P.R.China

<sup>7</sup> Department of nursing, Yijishan Hospital, the First Affiliated Hospital of Wannan Medical College, Zheshan West Road, Yijishan District, Wuhu City, Anhui Province

## ABSTRACT

**Objective** We investigated the moderation/mediation between the age of menarche and obesity parameters in predicting blood pressure (BP) in middle-aged and elderly Chinese.

**Design** Our study is a population-based cross-sectional study.

**Setting** Participants in this study came from the China Health and Retirement Longitudinal Study (CHARLS).

**Participants** The analytic sample included 4513 participants aged 45 to 96 years.

**Main outcome measurements** Data were selected from the CHARLS, a cross-sectional study. Between-group differences were evaluated using chi-square, t-test and one-way ANOVA. The trend of related variables by characteristics was also tested using contrast analysis, as appropriate. Then, correlations between characteristics, moderator, mediator, independent, and dependent variables were used by Spearman's correlation test and Pearson's correlation test. Finally, the mediation analysis was performed by model 4 in process v3.3, and the moderation analysis was used model 1 to assess. All covariates were adjusted in the moderation or mediation models.

**Results** In correlation analysis, body mass index (BMI) and waist circle (WC) level were positively correlated with both systolic blood pressure (SBP) and diastolic blood pressure (DBP) in women (BMI and DBP:  $r=0.221$ ,  $P<0.001$ ; WC and DBP:  $r=0.183$ ,  $P<0.001$ ; BMI and SBP:  $r=0.129$ ,  $P<0.001$ ; WC and SBP:  $r=0.177$ ,  $P<0.001$ ). Age of menarche was negatively correlated with DBP ( $r=-0.060$ ,  $P<0.001$ ). However, the age of menarche was not significantly correlated with SBP ( $r=0.014$ ,  $P=0.335$ ). In the moderator analysis, after controlling for the potential confounders, the interaction term of obesity parameters\*age of menarche was not significant for predicting either DBP (BMI:  $B=0.0260$ ,  $SE=0.0229$ ,  $P=0.2556$ , 95% CI [-0.0189,0.071]); WC:  $B=0.0099$ ,  $SE=0.0074$ ,  $P=0.1833$ , 95% CI [-0.0047,0.0244]) or SBP (BMI:  $B=0.0091$ ,  $SE=0.0504$ ,  $P=0.8561$ , 95% CI [-0.0897,0.108]); WC:  $B=-0.0032$ ,  $SE=0.0159$ ,  $P=0.8427$ , 95% CI [-0.0343,0.028]). All correlations were significant correlation between age of menarche, obesity parameters and BP except the path of the menarche age  $\rightarrow$ SBP (with the addition of the BMI indicator:  $\beta=-0.0004$ ,  $B=-0.0046$ ,  $P=0.9797$ , 95% CI [-0.3619,0.3526]); with the addition of the WC indicator:  $\beta=0.0004$ ,  $B=0.0044$ ,  $P=0.9804$ , 95% CI [-0.3439, 0.3526]) in crude model. In general, after controlling for potential confounders. BMI (DBP:  $\beta=-0.0471$ ,  $B=-0.2682$ ,  $P=0.0021$ , 95% CI [-0.4388, -0.0976]; SBP:  $\beta=-0.0515$ ,  $B=-0.6314$ ,  $P<0.001$ , 95% CI [-0.9889, -0.2739]) and WC (DBP:  $\beta=-0.0474$ ,  $B=-0.2689$ ,  $P<0.001$ , 95% CI [-0.4395, -0.0984]; SBP:  $\beta=-0.0524$ ,  $B=-0.632$ ,  $P<0.001$ , 95% CI [-0.9832, -0.2807]) partly

1 mediated the relationship between age of menarche and BP.  
2

3 **Conclusion** The interaction term of obesity parameters\*age of menarche was not significant for  
4 predicting either DBP or SBP in women. Moreover, obesity parameters partly mediated the  
5 relationship between the age of menarche and BP.  
6  
7

8 **Keywords** age at menarche, blood pressure, body mass index, moderator, mediator, obesity  
9 parameters, waist circle  
10  
11  
12  
13  
14

### 15 **Strengths and limitations of the study**

16 This is the first large population study to examine the moderation between the age of menarche  
17 and obesity parameters in predicting blood pressure (BP) in middle-aged and elderly Chinese, as well  
18 as the mediation effects of obesity parameters on the relationship between age of menarche and BP.  
19  
20

21 This study included a large sample of 4513 middle-aged and older Chinese. The results presented  
22 in this article represent the baseline data that could be explored further in prospective cohort studies.  
23  
24

25 The main limitations of our research are related to the cross-sectional study and the self-reported  
26 method used for the assessment of age at menarche and most related confounders.  
27  
28

29 Blood pressure in our study was measured at home by professionally trained volunteers, and the  
30 next step is the use of clinical blood pressure and ambulatory blood pressure.  
31  
32  
33  
34  
35  
36  
37  
38  
39  
40  
41  
42  
43  
44  
45  
46  
47  
48  
49  
50  
51  
52  
53  
54  
55  
56  
57  
58  
59  
60

## INTRODUCTION

Blood pressure (BP) is the force of circulating blood against the walls of the body's arteries, the major blood vessels in the body. Hypertension is diagnosed if BP readings are 140/90 mmHg or above on two different days. As a chronic disease[1], hypertension or elevated BP is a severe medical condition that significantly increases heart attack, stroke, blindness, kidney failure, and other complications. Hypertension risk factors[2-6] include stress, salt consumption, harmful use of alcohol, low intake of fruits and vegetables, saturated fat and trans fats, being overweight or obese, tobacco use, low diet in vitamin D, lack of physical activity, family history, aged 65 years or over and other co-existing diseases. The World Health Organization(WHO) said[7] an estimated 1.13 billion people worldwide have hypertension and most (two-thirds) living in low- and middle-income countries. It means that most people have high BP. Compared to the global average, people in low- and middle-income countries may bear a disproportionate and heavier burden of the disease, owing to several factors such as the ongoing nutritional transition in dietary consumption and energy expenditure, increasing trends in sedentary lifestyle, and other modifiable risk factors, and inadequate health care systems[8]. As a developing country, China has shown a relatively high and stable prevalence of hypertension among adults, especially in middle-aged and older people. Mahajan S, *et al.* [9] showed the prevalence of hypertension among middle-aged and elderly Chinese was approximately 41.81% in 2015. However, the rate control was still below 30%. Recently, hypertension control has become one of the critical public health interventions[10]. Therefore, it emphasizes the promotion of public health strategy to prevent the significant hypertension risk factors and assure the fullest available accessibility and use of quality health control for people with risk factors or who develop subclinical or overt hypertension. These actions are integral to a comprehensive public health strategy for hypertension promotion and prevention[11-13]. Though there is still much uncertainty about the etiology of hypertension, one of the strongest risk factors was overweight/obesity. Thus, increased body mass index (BMI) or centrally located body fat (especially waist circle [WC]) increases the risk of developing hypertension.

Several studies[14-18]have reported that early biological maturation has been associated with obesity and BP in adolescents. Werneck AO *et al.* [14] showed that behavioral and hereditary variables are more related to BP in late-maturing adolescents in adolescents. Widen E, *et al.*[15] found that earlier pubertal timing was associated with higher adult BMI and diastolic blood pressure (DBP) in both sexes. Mueller NT, *et al.* [16] showed that earlier menarche was associated with higher waist circumference and BMI measured. Dreyfus J, *et al.*[17] found that earlier age at menarche was

1 associated with higher mean BMI among African American and White women. Cao M, *et al.*[18]  
2 found that earlier age at menarche was associated with decreased DBP. However, it is not completed  
3 understood whether the changes in biological processes in the early years can affect cardiovascular  
4 outcomes across the life span. As important indicators of obesity, BMI/WC is directly associated with  
5 biological maturation (based on menarche age). Evidence from several studies[19-21] indicated that  
6 menarche was related to BMI in later life. Power C, *et al.*[19] found that timing of puberty was  
7 strongly associated with BMI for the earlier matures at ages 7-33 years. Adair LS, *et al.*[20] showed  
8 that overweight prevalence rates were significantly higher in early maturing adolescents. Must A, *et*  
9 *al.*[21] showed that early maturation in adult females overweight is mostly a result of the influence  
10 of elevated relative weight on early maturation. It has been speculated that the association between  
11 biological maturation and hypertension risk factors (based on menarche age) can be mediated or  
12 moderated by obesity parameters. Although speculative, the mediating or moderating role of obesity  
13 on the effect of early maturation (based on menarche age) on BP in adulthood has not been classified.  
14 However, this is especially important given that the onset of biological maturation, especially the age  
15 of menarche, now occurs at a much earlier age than in previous studies. Moreover, fully  
16 understanding the mediating effect of obesity on the association between early maturation (based on  
17 menarche age) and BP in adulthood could help identify women group that are at risk (based on obesity  
18 parameters) and those that should be put forward designed to place the many diverse conceptual  
19 and practice approaches and accomplishments in the early intervention. The moderating effect  
20 between early maturation (based on menarche age) and risk of hypertension (obesity parameters) on  
21 BP may also be fully considered.

22  
23  
24  
25  
26  
27  
28  
29  
30  
31  
32  
33  
34  
35  
36  
37  
38  
39  
40  
41  
42 To date, few studies on the mediating and moderating analysis between early maturation (based on  
43 menarche age) and risk of hypertension (obesity parameters) were conducted in individuals aged  $\geq 45$   
44 years. Thus, this study aimed to determine their association with age of menarche, obesity parameters,  
45 and other confounding factors using the China Health and Retirement Longitudinal Study (CHARLS)  
46 from participants aged  $\geq 45$  years in China.

## 47 48 49 50 51 52 53 **METHODS**

### 54 **Study design and setting**

55  
56 Data from CHARLS Wave 1 (2011) were used in our research. The CHARLS is an ongoing national  
57 longitudinal study administered by the National School for Development (China Center for Economic  
58  
59  
60



1 Research) [22] from 2011. The study was approved by the institutional ethical committees of Peking  
2 University. All participants provided informed consent.  
3  
4  
5

## 7 **Individuals**

8  
9 At baseline[22], 6883 women were recruited for a longitudinal study, 1875 individuals were excluded  
10 because the absence of metabolic measures, a group of 41 participants did not have medication history,  
11 and 65 individuals did not have their blood pressure, 389 individuals used antihypertension drugs.  
12  
13 Finally, 4513 individuals were included in the analyses. Figure 1 summarized the selection of  
14 participants. Our study involved 4513 participants aged  $\geq 45$  years were total women [mean  $\pm$  standard  
15 deviation age= $58.59 \pm 9.31$ years, ranged from 45 to 96years]. The mean and standard deviation of  
16 menarche age were  $16.27 \pm 2.18$  years (ranged from 10 to 30 years).  
17  
18  
19  
20  
21  
22  
23

## 24 **Self-report of risk factors**

25  
26 We employed a general sociodemographic questionnaire that included the age, age of menarche  
27 ( $\leq 14$ years, 15years, 16years, 17years, and  $\geq 18$ years), educational attainment (illiterate, less than  
28 elementary school, high school, and above vocational school), marital status (single and married),  
29 and region (rural and urban). The lifestyle questionnaire included smoking status (never smoker,  
30 previous smoker, and current smoker), alcohol consumption (never drinker, less than once a month  
31 and more than once a month), eating habit ( $\leq 2$  meals per day, 3 meals per day, and  $\geq 4$  meals per day),  
32 entertainment, the experience of a traumatic event (no and yes), and physical exercise habit (no, less  
33 than regular physical exercises, and regular physical exercises). History of cardiovascular diseases  
34 and liver disease, antihyperlipidemic drugs, and antidiabetic drugs were categorized in 'yes' or 'no'.  
35  
36 Most variables were used in our previous studies[23-29].  
37  
38  
39  
40  
41  
42  
43  
44  
45  
46  
47

## 48 **Measurements**

49  
50 Triglycerides (TG) level, low-density lipoprotein cholesterol (LDL-C), high-density lipoprotein  
51 cholesterol (HDL-C), and glycosylated hemoglobin (HbA1c) were analyzed by the enzymatic  
52 colorimetric tests, serum creatinine (Scr) and serum uric acid (SUA) level were analyzed using the  
53 urinalysis (UA) plus method. The average value of BP was measured by the mean of the 3-time  
54 measurements. Height was measured using a height measurement instrument (Omron hem-7200  
55 sphygmomanometer). Participants were asked to stand barefoot on the base plate of the height meter  
56  
57  
58  
59  
60



1 in the upright position, with the back against the vertical backplate of the measuring instrument, with  
2 eyes open, arms alongside the body and heels were closed and the toes were separated by 60 degrees.  
3 Anyone who appeared to be unable to complete measurement in time due to health reasons such as  
4 hunchback and inability to stand was excluded from our study. The method was used in our previous  
5 study[29]. BMI was calculated as body weight (kg) divided by the square of the subject's height (m).  
6 WC was measured midway between spina iliaca superior and the lower rib margin at the end of  
7 exhalation.  
8  
9  
10  
11  
12  
13

### 14 **Statistical analysis**

15  
16 The data were presented as means(M) and standard deviation (SD) unless indicated otherwise. Mean  
17 and standard deviation were used to describe continuous variables (age, age of menarche, LDL-C,  
18 HDL-C, TG, HbA1c, Scr, SUA, BMI, WC, DBP, and SBP level), and number and percentage were  
19 used to assess the categorical variables (educational attainment, marital status, region, alcohol  
20 consumption, smoking status, eating habits, entertainment, the experience of a traumatic event,  
21 physical activity, history of CVDs, history of liver diseases, history of antilipidemic medication, anti-  
22 diabetic medication). Between-group differences according to the age of menarche ( $\leq 14$ years,  
23 15years, 16years, 17years,  $\geq 18$ years) were evaluated by the ANOVA (continuous data) or chi-square  
24 test (categorical data). Differences between two categories of characteristics (marital status, region,  
25 entertainment, the experience of a traumatic event, history of CVDs, history of antilipidemic  
26 medication, history of liver diseases, anti-diabetic medication) were also evaluated using t-test.  
27 However, the trend of related variables (LDL-C, HDL-C, LDL-C/HDL-C, TG, HbA1c, Scr, SUA,  
28 BMI, WC, DBP, and SBP level) by above three categories of characteristics (age of menarche levels,  
29 educational attainment, alcohol consumption, smoking status, eating habits, physical activity) was  
30 also tested using contrast analysis. Correlations between characteristics and BP were used by  
31 Spearman's correlation test. However, relationships between continuous variables (age, LDL-C,  
32 HDL-C, LDL-C/HDL-C, TG, HbA1c, Scr, SUA, BMI, WC and menarche age) and BP were used by  
33 Pearson's correlation test. The mediation analysis was performed by model 4 in process v3.3[30-32],  
34 and the moderation analysis was used model 1 to assess. All covariates (including age, educational  
35 attainment, marital status, region, smoking status, alcohol consumption, eating habits, entertainment,  
36 the experience of a traumatic event, physical activity, history of cardiovascular diseases, hepatitis  
37 history, antihyperlipidemic drugs, antidiabetic drugs, LDL-C, HDL-C, TG, HbA1c, Scr, SUA) were  
38 adjusted for in the mediation or moderation models. Analyses including the unstandardized (B),  
39  
40  
41  
42  
43  
44  
45  
46  
47  
48  
49  
50  
51  
52  
53  
54  
55  
56  
57  
58  
59  
60

1 Standard Error (SE), or standardized coefficients ( $\beta$ ) with 95% confidence intervals(95%CI) were  
2  
3 calculated using the setting of modelling building in IBM SPSS22.0 software for Windows10 (IBM  
4  
5 Corp., Armonk, NY, USA) using the bootstrap method, with a 5% significance level.  
6  
7

### 8 9 **Patient and public involvement**

10  
11 No patients were involved in the development of the question, design or data interpretation.  
12  
13  
14  
15  
16  
17  
18  
19  
20  
21  
22  
23  
24  
25  
26  
27  
28  
29  
30  
31  
32  
33  
34  
35  
36  
37  
38  
39  
40  
41  
42  
43  
44  
45  
46  
47  
48  
49  
50  
51  
52  
53  
54  
55  
56  
57  
58  
59  
60

For peer review only

## RESULTS

The final sample consisted of 4513 women with an average age of  $58.59 \pm 9.31$  years (ranged from 45 to 96 years). The mean and standard deviation of menarche age were  $16.27 \pm 2.18$  years (ranged from 10 to 30 years). The mean and standard deviation of DBP and SBP level were  $76.31 \pm 12.45$  mmHg (ranged from 39 to 136 mmHg), and  $131.65 \pm 26.73$  mmHg (ranged from 76 to 235 mmHg), respectively. The mean and standard deviation of BMI and WC level were  $24.04 \pm 4.13$  kg/m<sup>2</sup> (ranged from 11.65 to 63.05 kg/m<sup>2</sup>), and  $84.67 \pm 12.83$  cm (ranged from 19.5 to 130.10 cm), respectively. Table 1 showed the characteristics by the age of menarche. There were differences between the age of menarche in educational attainment, region, cigarette smoking, entertainment, and history of CVDs. However, between-group differences in the prevalence of marital status, alcohol consumption, eating habit, the experience of a traumatic event, physical activity, hepatitis history, antilipidemic medication history, and antidiabetic medication history were not found. Women with a higher age of menarche had higher HDL-C level and age but had lower TG, SUA, BMI, WC, and DBP level. Moreover, there were no differences in LDL-C, LDL-C/HDL-C, HbA1c, Scr, and SBP level between the age of menarche groups.

**Table 1 Characteristics by age at menarche (N=4513)**

| Variables                            | ≤14(years)<br>N=946 | 15(years)<br>N=671 | 16(years)<br>N=930 | 17(years)<br>N=702 | ≥18(years)<br>N=1264 | P                   |
|--------------------------------------|---------------------|--------------------|--------------------|--------------------|----------------------|---------------------|
| Age(years)                           | 56.88±9.38          | 57.49±9.34         | 58.41±9.42         | 58.6±9.12          | 60.57±8.91           | <0.001 <sup>a</sup> |
| Educational attainment               |                     |                    |                    |                    |                      |                     |
| Illiterate                           | 300(31.71)          | 233(34.72)         | 378(40.65)         | 314(44.73)         | 649(51.34)           | <0.001              |
| Less than elementary school          | 527(55.71)          | 383(57.08)         | 486(52.26)         | 343(48.86)         | 572(45.25)           |                     |
| High school                          | 82(8.67)            | 42(6.26)           | 48(5.16)           | 34(4.84)           | 34(2.69)             |                     |
| Above vocational school              | 37(3.91)            | 13(1.94)           | 18(1.94)           | 11(1.57)           | 9(0.71)              |                     |
| Marital status                       |                     |                    |                    |                    |                      |                     |
| Single                               | 137(14.48)          | 79(11.77)          | 137(14.73)         | 98(13.96)          | 207(16.38)           | 0.101               |
| Married                              | 809(85.52)          | 592(88.23)         | 793(85.27)         | 604(86.04)         | 1057(83.62)          |                     |
| Region                               |                     |                    |                    |                    |                      |                     |
| Rural                                | 519(54.86)          | 426(63.49)         | 577(62.04)         | 454(64.67)         | 885(70.02)           | <0.001              |
| Urban                                | 427(45.14)          | 245(36.51)         | 353(37.96)         | 248(35.33)         | 379(29.98)           |                     |
| Cigarette smoking                    |                     |                    |                    |                    |                      |                     |
| Never smoker                         | 883(93.34)          | 629(93.74)         | 846(90.97)         | 646(92.02)         | 1156(91.46)          | 0.017               |
| Previous smoker                      | 8(0.85)             | 11(1.64)           | 18(1.94)           | 13(1.85)           | 38(3.01)             |                     |
| Current smoker                       | 55(5.81)            | 31(4.62)           | 66(7.1)            | 43(6.13)           | 70(5.54)             |                     |
| Alcohol consumption                  |                     |                    |                    |                    |                      |                     |
| Never drinker                        | 827(87.42)          | 607(90.46)         | 809(86.99)         | 620(88.32)         | 1100(87.03)          | 0.520               |
| Less than once a month               | 45(4.76)            | 26(3.87)           | 48(5.16)           | 37(5.27)           | 65(5.14)             |                     |
| More than once a month               | 74(7.82)            | 38(5.66)           | 73(7.85)           | 45(6.41)           | 99(7.83)             |                     |
| Eating habit                         |                     |                    |                    |                    |                      |                     |
| ≤2 meals per day                     | 131(13.85)          | 99(14.75)          | 123(13.23)         | 82(11.68)          | 172(13.61)           | 0.706               |
| 3 meals per day                      | 804(84.99)          | 567(84.5)          | 794(85.38)         | 609(86.75)         | 1073(84.89)          |                     |
| ≥4 meals per day                     | 11(1.16)            | 5(0.75)            | 13(1.40)           | 11(1.57)           | 19(1.50)             |                     |
| Entertainment                        |                     |                    |                    |                    |                      |                     |
| No                                   | 417(44.08)          | 335(49.93)         | 470(50.54)         | 372(52.99)         | 655(51.82)           | 0.002               |
| Yes                                  | 529(55.92)          | 336(50.07)         | 460(49.46)         | 330(47.01)         | 609(48.18)           |                     |
| The experience of a traumatic event  |                     |                    |                    |                    |                      |                     |
| No                                   | 881(93.13)          | 630(93.89)         | 867(93.23)         | 652(92.88)         | 1169(92.48)          | 0.837               |
| Yes                                  | 65(6.87)            | 41(6.11)           | 63(6.77)           | 50(7.12)           | 95(7.52)             |                     |
| Physical activity                    |                     |                    |                    |                    |                      |                     |
| No physical exercise                 | 587(62.05)          | 393(58.57)         | 556(59.78)         | 428(60.97)         | 771(61.00)           | 0.260               |
| Less than regular physical exercises | 178(18.82)          | 137(20.42)         | 171(18.39)         | 136(19.37)         | 271(21.44)           |                     |
| Regular physical exercises           | 181(19.13)          | 141(21.01)         | 203(21.83)         | 138(19.66)         | 222(17.56)           |                     |
| History of CVDs                      |                     |                    |                    |                    |                      |                     |
| No                                   | 810(85.62)          | 590(87.93)         | 780(83.87)         | 605(86.18)         | 1115(88.21)          | 0.033               |
| Yes                                  | 136(14.38)          | 81(12.07)          | 150(16.13)         | 97(13.82)          | 149(11.79)           |                     |

|    |                                     |              |               |              |              |              |                     |
|----|-------------------------------------|--------------|---------------|--------------|--------------|--------------|---------------------|
| 1  | Hepatitis history                   |              |               |              |              |              |                     |
| 2  | No                                  | 910(96.19)   | 647(96.42)    | 885(95.16)   | 670(95.44)   | 1226(96.99)  | 0.205               |
| 3  | Yes                                 | 36(3.81)     | 24(3.58)      | 45(4.84)     | 32(4.56)     | 38(3.01)     |                     |
| 4  | History of antilipidemic medication |              |               |              |              |              |                     |
| 5  | No                                  | 884(93.45)   | 628(93.59)    | 884(95.05)   | 656(93.45)   | 1184(93.67)  | 0.566               |
| 6  | Yes                                 | 62(6.55)     | 43(6.41)      | 46(4.95)     | 46(6.55)     | 80(6.33)     |                     |
| 7  | History of antidiabetic medication  |              |               |              |              |              |                     |
| 8  | No                                  | 910(96.19)   | 645(96.13)    | 883(94.95)   | 663(94.44)   | 1213(95.97)  | 0.309               |
| 9  | Yes                                 | 36(3.81)     | 26(3.87)      | 47(5.05)     | 39(5.56)     | 51(4.03)     |                     |
| 10 | LDL-C (mg/dL)                       | 119.66±35.04 | 118.04±35.61  | 120.62±34.81 | 121.79±36.79 | 121.45±35.27 | 0.065 <sup>a</sup>  |
| 11 | HDL-C (mg/dL)                       | 50.57±14.17  | 51.31±14.01   | 50.84±14.43  | 51.05±14.18  | 53.2±14.87   | <0.001 <sup>a</sup> |
| 12 | LDL-C/HDL-C                         | 2.50±0.90    | 2.42±0.89     | 2.52±0.91    | 2.51±0.92    | 2.43±0.92    | 0.242 <sup>a</sup>  |
| 13 | TG (mg/dL)                          | 143.09±99.89 | 142.86±103.67 | 142.07±98.31 | 145.85±132.3 | 124.16±76.25 | <0.001 <sup>a</sup> |
| 14 | HbA1c (%)                           | 5.31±0.83    | 5.25±0.86     | 5.31±0.89    | 5.32±0.84    | 5.27±0.76    | 0.594 <sup>a</sup>  |
| 15 | Scr (mg/dL)                         | 0.69±0.14    | 0.69±0.14     | 0.70±0.18    | 0.68±0.13    | 0.69±0.15    | 0.813 <sup>a</sup>  |
| 16 | SUA (mg/dL)                         | 4.09±1.10    | 3.99±1.09     | 4.04±1.07    | 4.01±1.01    | 3.97±1.05    | 0.021 <sup>a</sup>  |
| 17 | BMI (kg/m <sup>2</sup> )            | 24.63±4.11   | 24.39±4.15    | 24.02±3.90   | 24.18±4.49   | 23.36±3.99   | <0.001 <sup>a</sup> |
| 18 | WC (cm)                             | 86.08±13.01  | 85.35±12.62   | 85.29±11.33  | 84.53±13.38  | 82.89±13.36  | <0.001 <sup>a</sup> |
| 19 | DBP (mmHg)                          | 77.07±12.07  | 77.28±12.53   | 77.01±12.51  | 76.31±12.80  | 74.72±25.82  | <0.001 <sup>a</sup> |
| 20 | SBP (mmHg)                          | 131.09±26.36 | 131.66±25.49  | 131.63±26.64 | 129.90±29.9  | 129.47±25.82 | 0.062 <sup>a</sup>  |

CVDs: cardiovascular diseases; LDL-C: low-density lipoprotein cholesterol; HDL-C: high-density lipoprotein cholesterol; TG: triglycerides; HbA1c: Hemoglobin A1C; Scr: serum creatinine; SUA: serum uric acid; BMI: body mass index; WC: waist circle; DBP: diastolic blood pressure; SBP: systolic blood pressure.

<sup>a</sup>P-value for trend

Characteristics, according to BMI and WC in women, were presented in Table 2. Firstly, women with the place in rural, more alcohol consumption, higher age of menarche had lower BMI and WC level; Secondly, women with a history of CVDs, antilipidemic medication, and antidiabetic medication had higher BMI and WC level than women without medical illness. Thirdly, women with higher educational attainment, being married, being never smoking, taking more eating meals, and taking entertainment had higher BMI level. At last, women with the experience of a traumatic event had lower WC level.

**Table2 Characteristics of the participants with BMI and WC (N=4513)**

| Variables                            | BMI (cm)   | WC (cm)     | P-value for BMI     | P-value for WC      |
|--------------------------------------|------------|-------------|---------------------|---------------------|
| Educational attainment               |            |             |                     |                     |
| Illiterate                           | 23.57±4.19 | 84.35±12.95 | 0.001 <sup>a</sup>  | 0.971 <sup>a</sup>  |
| Less than elementary school          | 24.31±4.03 | 85.14±12.48 |                     |                     |
| High school                          | 24.93±4.07 | 83.17±14.65 |                     |                     |
| Above vocational school              | 24.85±4.43 | 83.40±13.99 |                     |                     |
| Marital status                       |            |             |                     |                     |
| Single                               | 23.21±4.18 | 84.93±12.04 | <0.001              | 0.582               |
| Married                              | 24.19±4.10 | 84.63±12.97 |                     |                     |
| Region                               |            |             |                     |                     |
| Rural                                | 23.64±3.96 | 83.95±12.42 | <0.001              | <0.001              |
| Urban                                | 24.75±4.32 | 85.94±13.43 |                     |                     |
| Cigarette smoking                    |            |             |                     |                     |
| Never smoker                         | 24.11±4.12 | 84.73±12.77 | <0.001 <sup>a</sup> | 0.135 <sup>a</sup>  |
| Previous smoker                      | 23.79±4.14 | 86.83±10.36 |                     |                     |
| Current smoker                       | 23.17±4.11 | 83.13±14.40 |                     |                     |
| Alcohol consumption                  |            |             |                     |                     |
| Never drinker                        | 24.10±4.14 | 85.02±12.5  | 0.011 <sup>a</sup>  | <0.001 <sup>a</sup> |
| Less than once a month               | 23.88±4.17 | 81.78±15.16 |                     |                     |
| More than once a month               | 23.51±3.94 | 82.49±14.62 |                     |                     |
| Eating habit                         |            |             |                     |                     |
| ≤2 meals per day                     | 23.27±3.89 | 84.12±10.42 | <0.001 <sup>a</sup> | 0.734 <sup>a</sup>  |
| 3 meals per day                      | 24.18±4.14 | 84.82±13.18 |                     |                     |
| ≥4 meals per day                     | 23.10±4.69 | 80.82±12.01 |                     |                     |
| Entertainment                        |            |             |                     |                     |
| No                                   | 23.64±4.09 | 84.34±12.08 | <0.001              | 0.085               |
| Yes                                  | 24.45±4.13 | 85.00±13.53 |                     |                     |
| The experience of a traumatic event  |            |             |                     |                     |
| No                                   | 24.06±4.14 | 84.82±12.57 | 0.474               | 0.004               |
| Yes                                  | 23.88±3.94 | 82.64±15.81 |                     |                     |
| Physical activity                    |            |             |                     |                     |
| No physical exercise                 | 24.05±4.29 | 84.79±12.74 | 0.400 <sup>a</sup>  | 0.701 <sup>a</sup>  |
| Less than regular physical exercises | 23.82±3.70 | 84.25±12.48 |                     |                     |
| Regular physical exercises           | 24.26±4.03 | 84.74±13.48 |                     |                     |

|    |                                     |             |             |                     |                     |
|----|-------------------------------------|-------------|-------------|---------------------|---------------------|
| 1  | History of CVDs                     |             |             |                     |                     |
| 2  | No                                  | 23.92±4.09  | 84.26±12.63 | <0.001              | <0.001              |
| 3  | Yes                                 | 24.83±4.28  | 87.25±13.89 |                     |                     |
| 4  | Hepatitis history                   |             |             |                     |                     |
| 5  | No                                  | 24.04±4.15  | 84.66±12.79 | 0.871               | 0.948               |
| 6  | Yes                                 | 24.09±3.47  | 84.73±14.37 |                     |                     |
| 7  | History of antilipidemic medication |             |             |                     |                     |
| 8  | No                                  | 23.87±3.99  | 84.22±12.72 | <0.001              | <0.001              |
| 9  | Yes                                 | 26.75±5.14  | 91.59±12.58 |                     |                     |
| 10 | History of antidiabetic medication  |             |             |                     |                     |
| 11 | No                                  | 23.95±4.01  | 84.42±12.81 | <0.001              | <0.001              |
| 12 | Yes                                 | 26.13±5.81  | 90.18±12.20 |                     |                     |
| 13 | Menarche age(years)                 |             |             |                     |                     |
| 14 | ≤14                                 | 24.63±4.11  | 86.08±13.01 | <0.001 <sup>a</sup> | <0.001 <sup>a</sup> |
| 15 | 15                                  | 24.39±4.15  | 85.35±12.62 |                     |                     |
| 16 | 16                                  | 24.02±3.90  | 85.29±11.33 |                     |                     |
| 17 | 17                                  | 24.18±4.49  | 84.53±13.38 |                     |                     |
| 18 | ≥18                                 | 23.36±13.36 | 82.89±13.36 |                     |                     |

CVDs: cardiovascular diseases; BMI: body mass index; WC: waist circle.

<sup>a</sup>P-value for trend

Characteristics, according to DBP and SBP in women, were presented in Table 3. Firstly, women with more alcohol consumption had lower DBP and SBP level; Secondly, women with a history of CVDs and antilipidemic medication had higher DBP and SBP level than women without medical illness. Thirdly, women with more eating meals, higher age of menarches had lower DBP level. At last, women with higher educational attainment, being married, and having regular physical exercises had lower SBP level, but women with antidiabetic medication had higher SBP level than women without medical illness.

**Table3 Table2 Characteristics of the participants with DBP and SBP (N=4513)**

| Variables                            | DBP(mmHg)   | SBP(mmHg)    | P-value for DBP     | P-value for SBP     |
|--------------------------------------|-------------|--------------|---------------------|---------------------|
| Educational attainment               |             |              |                     |                     |
| Illiterate                           | 76.37±12.45 | 133.93±28.43 | 0.288 <sup>a</sup>  | <0.001 <sup>a</sup> |
| Less than elementary school          | 76.38±12.42 | 128.89±24.99 |                     |                     |
| High school                          | 76.12±12.65 | 122.98±18.58 |                     |                     |
| Above vocational school              | 73.86±12.47 | 127.84±40.38 |                     |                     |
| Marital status                       |             |              |                     |                     |
| Single                               | 76.70±11.96 | 139.61±31.93 | 0.388               | <0.001              |
| Married                              | 76.25±12.53 | 129.12±25.42 |                     |                     |
| Region                               |             |              |                     |                     |
| Rural                                | 76.20±12.72 | 130.18±25.92 | 0.435               | 0.121               |
| Urban                                | 76.50±11.96 | 131.46±28.06 |                     |                     |
| Cigarette smoking                    |             |              |                     |                     |
| Never smoker                         | 76.32±12.45 | 130.43±26.97 | 0.673 <sup>a</sup>  | 0.051 <sup>a</sup>  |
| Previous smoker                      | 73.60±11.41 | 132.13±22.83 |                     |                     |
| Current smoker                       | 77.09±12.65 | 133.61±23.78 |                     |                     |
| Alcohol consumption                  |             |              |                     |                     |
| Never drinker                        | 76.53±12.38 | 131.27±27.27 | 0.003 <sup>a</sup>  | 0.001 <sup>a</sup>  |
| Less than once a month               | 74.76±12.18 | 123.81±19.94 |                     |                     |
| More than once a month               | 74.73±13.26 | 127.77±23.06 |                     |                     |
| Eating habits                        |             |              |                     |                     |
| ≤2 meals per day                     | 77.69±12.60 | 132.14±26.68 | <0.001 <sup>a</sup> | 0.117 <sup>a</sup>  |
| 3 meals per day                      | 76.17±12.41 | 130.44±26.37 |                     |                     |
| ≥4 meals per day                     | 71.56±11.46 | 128.63±44.41 |                     |                     |
| Entertainment                        |             |              |                     |                     |
| No                                   | 76.08±12.60 | 130.66±26.33 | 0.216               | 0.975               |
| Yes                                  | 76.54±12.30 | 130.64±27.12 |                     |                     |
| The experience of a traumatic event  |             |              |                     |                     |
| No                                   | 76.38±12.47 | 130.84±27.12 | 0.219               | 0.075               |
| Yes                                  | 75.48±12.14 | 128.05±20.66 |                     |                     |
| Physical activity                    |             |              |                     |                     |
| No physical exercise                 | 76.34±12.46 | 131.47±28.25 | 0.873 <sup>a</sup>  | 0.024 <sup>a</sup>  |
| Less than regular physical exercises | 76.05±12.76 | 129.23±22.14 |                     |                     |
| Regular physical exercises           | 76.50±12.08 | 129.54±26.03 |                     |                     |
| History of CVDs                      |             |              |                     |                     |
| No                                   | 76.11±12.44 | 130.02±26.29 | 0.021               | <0.001              |

|    |                                     |             |              |                     |                    |
|----|-------------------------------------|-------------|--------------|---------------------|--------------------|
| 1  | Yes                                 | 77.39±12.40 | 134.50±29.28 |                     |                    |
| 2  | Hepatitis history                   |             |              |                     |                    |
| 3  | No                                  | 76.36±12.45 | 130.76±26.50 | 0.017               | 0.144              |
| 4  | Yes                                 | 74.10±11.56 | 127.76±32.79 |                     |                    |
| 5  | History of antilipidemic medication |             |              |                     |                    |
| 6  | No                                  | 76.07±12.34 | 130.12±26.01 | <0.001              | <0.001             |
| 7  | Yes                                 | 80.09±13.46 | 138.80±35.01 |                     |                    |
| 8  | History of antidiabetic medication  |             |              |                     |                    |
| 9  | No                                  | 76.25±12.47 | 130.17±25.46 | 0.100               | <0.001             |
| 10 | Yes                                 | 77.73±11.83 | 140.96±45.17 |                     |                    |
| 11 | Menarche age(years)                 |             |              |                     |                    |
| 12 | ≤14                                 | 77.07±12.07 | 131.09±26.36 |                     |                    |
| 13 | 15                                  | 77.28±12.53 | 131.66±25.49 | <0.001 <sup>a</sup> | 0.062 <sup>a</sup> |
| 14 | 16                                  | 77.01±12.51 | 131.63±26.64 |                     |                    |
| 15 | 17                                  | 76.31±12.80 | 129.90±29.90 |                     |                    |
| 16 | ≥18                                 | 74.72±12.31 | 129.47±25.82 |                     |                    |

CVDs: cardiovascular diseases; DBP: diastolic blood pressure; SBP: systolic blood pressure.

<sup>a</sup>P-value for trend

Correlations between characteristics, independent, moderators, mediators and dependent variables, according to DBP and SBP, were presented in Table 4. Firstly, drinking, history of CVDs, antilipidemic medication, LDL-C, HDL-C, LDL-C/HDL-C, TG, HbA<sub>1c</sub>, Scr, SUA, BMI, and WC were significantly correlated with DBP and SBP in women; Secondly, eating habits, history of liver diseases, and menarche age were significantly correlated with DBP; At last, age, educational attainment, marital status, physical exercises, and antidiabetic medication were significantly correlated with SBP.

**Table 4 Relationship between various characteristics and blood pressure status of participants (N=4513)**

| Variables                           | DBP<br>r(P)    | SBP<br>r(P)    |
|-------------------------------------|----------------|----------------|
| Age                                 | -0.016(0.275)  | 0.259(<0.001)  |
| Educational attainment              | -0.016(0.288)  | -0.106(<0.001) |
| Marital status                      | -0.013(0.388)  | -0.139(<0.001) |
| Current residence                   | 0.012(0.435)   | 0.023(0.121)   |
| Smoking status                      | 0.006(0.673)   | 0.029(0.051)   |
| Drinking                            | -0.045(0.003)  | -0.051(0.001)  |
| Eating habits                       | -0.055(<0.001) | -0.023(0.117)  |
| Entertainment                       | 0.018(0.216)   | 0.000(0.975)   |
| The experience of a traumatic event | -0.018(0.219)  | -0.027(0.075)  |
| Physical exercises                  | 0.002(0.873)   | -0.034(0.024)  |
| History of CVDs                     | 0.035(0.018)   | 0.058(<0.001)  |
| History of liver diseases           | -0.035(0.018)  | -0.022(0.146)  |
| Antilipidemic medication            | 0.078(<0.001)  | 0.078(<0.001)  |
| Antidiabetic medication             | 0.025(0.100)   | 0.083(<0.001)  |
| LDL-C                               | 0.050(0.001)   | 0.060(<0.001)  |
| HDL-C                               | -0.099(<0.001) | -0.062(<0.001) |
| LDL-C/HDL-C                         | 0.106(<0.001)  | 0.094(<0.001)  |
| TG                                  | 0.100(<0.001)  | 0.091(<0.001)  |
| HbA <sub>1c</sub>                   | 0.061(<0.001)  | 0.066(<0.001)  |
| Scr                                 | 0.056(<0.001)  | 0.076(<0.001)  |

|   |              |                |               |
|---|--------------|----------------|---------------|
| 1 | SUA          | 0.085(<0.001)  | 0.111(<0.001) |
| 2 | BMI          | 0.221(<0.001)  | 0.129(<0.001) |
| 3 | WC           | 0.183(<0.001)  | 0.177(<0.001) |
| 4 |              |                |               |
| 5 | Menarche age | -0.060(<0.001) | -0.014(0.335) |

6 CVDs: cardiovascular diseases; LDL-C: low-density lipoprotein cholesterol; HDL-C: high-density lipoprotein cholesterol; TG:  
7 triglycerides; HbA1c: Hemoglobin A1C; Scr: serum creatinine; SUA: serum uric acid; BMI: body mass index; WC: waist circle; DBP:  
8 diastolic blood pressure; SBP: systolic blood pressure.

9

10

11

12

13

14

15

16

17

18

19

20

21

22

23

24

25

26

27

28

29

30

31

32

33

34

35

36

37

38

39

40

41

42

43

44

45

46

47

48

49

50

51

52

53

54

55

56

57

58

59

60

In the moderator analysis, we tested the interaction between menarche age and obesity in predicting systolic and diastolic BP. The standard error, standardized coefficients and the adjusting associated 95% confidence intervals (CIs) are shown in Table 5. We controlled for socio-demographic characteristics, health behaviors, medical histories, and metabolic measures. After controlling for the total potential confounders, the moderating effect of obesity indicators on the relationship between age of menarche and BP was tested. The interaction term of obesity parameters\*age of menarche was not significant for predicting either DBP (BMI, adjusted  $P= 0.2556$ ; WC, adjusted  $P= 0.1833$ ) or SBP (BMI, adjusted  $P= 0.8561$ ; WC, adjusted  $P= 0.8427$ ) in women.

**Table 5 Moderator effect of obesity on the relationship between menarche age and BP in women (N=4513)**

| Dependent | Variables         | Model one <sup>a</sup> |                           |        | Model two <sup>b</sup> |                           |        | Model three <sup>c</sup> |                           |        | Model four <sup>d</sup> |                           |        | Model five <sup>e</sup> |                           |        |
|-----------|-------------------|------------------------|---------------------------|--------|------------------------|---------------------------|--------|--------------------------|---------------------------|--------|-------------------------|---------------------------|--------|-------------------------|---------------------------|--------|
|           |                   | SE                     | B (95%CI)                 | P      | se                     | B (95%CI)                 | P      | SE                       | B (95%CI)                 | P      | SE                      | B (95%CI)                 | P      | se                      | B (95%CI)                 | P      |
| DBP       | Menarche age      | 0.0835                 | -0.2027(-0.3665, -0.0390) | 0.0153 | 0.0855                 | -0.2528(-0.4203, -0.0852) | 0.0031 | 0.0853                   | -0.2411(-0.4084, -0.0738) | 0.0047 | 0.0854                  | -0.2485(-0.4158, -0.0811) | 0.0036 | 0.0973                  | -0.2162(-0.4069, -0.0254) | 0.0263 |
|           | BMI               | 0.0440                 | 0.6546(0.5684,0.7409)     | <0.001 | 0.0447                 | 0.6757(0.5881,0.7634)     | <0.001 | 0.0449                   | 0.6835(0.5955,0.7715)     | <0.001 | 0.0458                  | 0.6647(0.5750,0.7544)     | <0.001 | 0.0556                  | 0.5916(0.4827,0.7005)     | <0.001 |
|           | BMI× Menarche age | 0.0204                 | 0.0279(-0.0121,0.0678)    | 0.1719 | 0.0204                 | 0.0258(-0.0141,0.0658)    | 0.2046 | 0.0203                   | 0.0247(-0.0152,0.0645)    | 0.2248 | 0.0203                  | 0.0220(-0.0178,0.0618)    | 0.2790 | 0.0229                  | 0.0260(-0.0189,0.071)     | 0.2556 |
| SBP       | Menarche age      | 0.1826                 | -0.0003(-0.3583,0.3576)   | 0.9986 | 0.1789                 | -0.5822(-0.9329, -0.2315) | 0.0011 | 0.1788                   | -0.5682(-0.9187, -0.2177) | 0.0015 | 0.1795                  | -0.5944(-0.9462, -0.2425) | <0.001 | 0.2141                  | -0.5084(-0.9282, -0.0886) | 0.0176 |
|           | BMI               | 0.0964                 | 0.8361(0.6470,1.0251)     | <0.001 | 0.0938                 | 1.0927(0.9088,1.2766)     | <0.001 | 0.0942                   | 1.0906(0.9058,1.2753)     | <0.001 | 0.0965                  | 1.0287(0.8396,1.2178)     | <0.001 | 0.1223                  | 0.8846(0.6448,1.1244)     | <0.001 |
|           | BMI× Menarche age | 0.0446                 | 0.0178(-0.0696,0.1052)    | 0.6896 | 0.0426                 | 0.0111(-0.0726,0.0947)    | 0.7955 | 0.0426                   | 0.0113(-0.0722,0.0948)    | 0.7914 | 0.0427                  | 0.0052(-0.0786,0.0889)    | 0.9038 | 0.0504                  | 0.0091(-0.0897,0.108)     | 0.8561 |
| DBP       | Menarche age      | 0.0838                 | -0.2569(-0.4213, -0.0925) | 0.0022 | 0.0861                 | -0.2588(-0.4277, -0.0900) | 0.0027 | 0.0861                   | -0.2481(-0.4168, -0.0794) | 0.0040 | 0.0861                  | -0.2561(-0.4248, -0.0873) | 0.0029 | 0.0979                  | -0.2001(-0.3921, -0.0082) | 0.0410 |
|           | WC                | 0.0142                 | 0.1732(0.1452,0.2011)     | <0.001 | 0.0143                 | 0.1752(0.1471,0.2032)     | <0.001 | 0.0143                   | 0.1730(0.1449,0.2011)     | <0.001 | 0.0145                  | 0.1645(0.1361,0.193)      | <0.001 | 0.0172                  | 0.1472(0.1135,0.1809)     | <0.001 |
|           | WC× Menarche age  | 0.0065                 | 0.0058(-0.007,0.0186)     | 0.3758 | 0.0066                 | 0.0054(-0.0075,0.0182)    | 0.4136 | 0.0065                   | 0.005(-0.0079,0.0178)     | 0.4473 | 0.0065                  | 0.0043(-0.0085,0.0171)    | 0.5075 | 0.0074                  | 0.0099(-0.0047,0.0244)    | 0.1833 |
| SBP       | Menarche age      | 0.1777                 | -0.0009(-0.3492,0.3475)   | 0.9961 | 0.1761                 | -0.5656(-0.9107, -0.2204) | 0.0013 | 0.1760                   | -0.5546(-0.8997, -0.2094) | 0.0016 | 0.1766                  | -0.581(-0.9273, -0.2347)  | 0.0010 | 0.2096                  | -0.4548(-0.8658, -0.0438) | 0.0301 |
|           | WC                | 0.0302                 | 0.3637(0.3044,0.4229)     | <0.001 | 0.0293                 | 0.3228(0.2654,0.3802)     | <0.001 | 0.0294                   | 0.3153(0.2578,0.3729)     | <0.001 | 0.0298                  | 0.2944(0.236,0.3528)      | <0.001 | 0.0368                  | 0.2744(0.2022,0.3466)     | <0.001 |
|           | WC× Menarche age  | 0.0139                 | -0.0156(-0.0428,0.0116)   | 0.2607 | 0.0134                 | -0.0061(-0.0323,0.0202)   | 0.6501 | 0.0134                   | -0.0063(-0.0326,0.0199)   | 0.6367 | 0.0134                  | -0.0081(-0.0344,0.0182)   | 0.5443 | 0.0159                  | -0.0032(-0.0343,0.028)    | 0.8427 |

CVDs: cardiovascular diseases; LDL-C: low-density lipoprotein cholesterol; HDL-C: high-density lipoprotein cholesterol; TG: triglycerides; HbA1c: Hemoglobin A1c; Scr: serum creatinine; SUA: serum uric acid; BMI: body mass index; WC: waist circle; DBP: diastolic blood pressure; SBP: systolic blood pressure; Un-standardized: B; Standard Error: SE.

<sup>a</sup> Unadjusted;

<sup>b</sup> Adjusted for age, educational attainment, marital status, region;

<sup>c</sup> Adjusted for age, educational attainment, marital status, region, smoking status, alcohol consumption, eating habits, entertainment, experience of a traumatic event, physical activity;

<sup>d</sup> Adjusted for age, educational attainment, marital status, region, smoking status, alcohol consumption, eating habits, entertainment, experience of a traumatic event, physical activity, history of CVDs, hepatitis history, antihyperlipidemic drugs, antidiabetic drugs;

<sup>e</sup> Adjusted for age, educational attainment, marital status, region, smoking status, alcohol consumption, eating habits, entertainment, experience of a traumatic event, physical activity, history of CVDs, hepatitis history, antihyperlipidemic drugs, antidiabetic drugs, LDL-C, HDL-C, TG, HbA1c, Scr, SUA.



1 In the mediation analysis, we estimated the BP equation using bootstrap inference for model  
2 coefficients. The un-standardized, standardized coefficients and the adjusting associated 95%  
3 confidence intervals (CIs) are shown in Table 6. We controlled for socio-demographic characteristics,  
4 health behaviors, medical histories, and metabolic measures. After controlling for the total potential  
5 confounders, the mediating effect of obesity indicators on the relationship between age of menarche  
6 and BP was tested. All correlations were significant correlation between age of menarche, obesity  
7 parameters and BP except the path of the age of menarche→SBP (with the addition of the BMI or  
8 WC indicator) in model one. In general, after controlling for potential confounders. WC and BMI  
9 partly mediated the relationship between the age of menarche and BP.  
10  
11  
12  
13  
14  
15  
16  
17  
18  
19  
20  
21  
22  
23  
24  
25  
26  
27  
28  
29  
30  
31  
32  
33  
34  
35  
36  
37  
38  
39  
40  
41  
42  
43  
44  
45  
46  
47  
48  
49  
50  
51  
52  
53  
54  
55  
56  
57  
58  
59  
60

**Table 6 Mediation effect of obesity on the relationship between age at menarche and BP in women (N=4513)**

| Path  |                  | Model one <sup>a</sup> |                           |        | Model two <sup>b</sup> |                           |        | Model three <sup>c</sup> |                           |        | Model four <sup>d</sup> |                           |        | Model five <sup>e</sup> |                           |        |
|-------|------------------|------------------------|---------------------------|--------|------------------------|---------------------------|--------|--------------------------|---------------------------|--------|-------------------------|---------------------------|--------|-------------------------|---------------------------|--------|
|       |                  | $\beta$                | B (95%CI)                 | P      | $\beta$                | B (95%CI)                 | P      | $\beta$                  | B (95%CI)                 | P      | $\beta$                 | B (95%CI)                 | P      | $\beta$                 | B (95%CI)                 | P      |
| Path1 | Menarche age→BMI | -0.1080                | -0.2045(-0.2595, -0.1496) | <0.001 | -0.0725                | -0.1374(-0.1930, -0.0818) | <0.001 | -0.0707                  | -0.1339(-0.1892, -0.0786) | <0.001 | -0.0705                 | -0.1334(-0.1880, -0.0788) | <0.001 | -0.0468                 | -0.0885(-0.1409, -0.0361) | <0.001 |
|       | Menarche age→DBP | -0.0367                | -0.2096(-0.3731, -0.0461) | 0.0120 | -0.0454                | -0.2596(-0.4268, -0.0924) | 0.0024 | -0.0433                  | -0.2475(-0.4145, -0.0806) | 0.0037 | -0.0447                 | -0.2542(-0.4213, -0.0872) | 0.0029 | -0.0379                 | -0.2154(-0.3833, -0.0474) | 0.0120 |
|       | BMI→DBP          | 0.2171                 | 0.6545(0.5682, 0.7408)    | <0.001 | 0.2241                 | 0.6757(0.5881, 0.7634)    | <0.001 | 0.2276                   | 0.6835(0.5955, 0.7715)    | <0.001 | 0.2208                  | 0.6643(0.5746, 0.7541)    | <0.001 | 0.1986                  | 0.5973(0.5026, 0.6921)    | <0.001 |
|       | Total effect     | -0.0601                | -0.3435(-0.5099, -0.177)  | <0.001 | -0.0617                | -0.3524(-0.5234, -0.1815) | <0.001 | -0.0593                  | -0.3390(-0.5098, -0.1683) | <0.001 | -0.0602                 | -0.3429(-0.5133, -0.1724) | <0.001 | -0.0471                 | -0.2682(-0.4388, -0.0976) | 0.0021 |
| Path2 | Menarche age→BMI | 0.1085                 | -0.2051(-0.2601, -0.1502) | <0.001 | -0.0731                | -0.1381(-0.1936, -0.0826) | <0.001 | -0.0712                  | -0.1346(-0.1898, -0.0793) | <0.001 | -0.0711                 | -0.1342(-0.1887, -0.0797) | <0.001 | -0.0473                 | -0.0892(-0.1416, -0.0369) | <0.001 |
|       | Menarche age→SBP | -0.0004                | -0.0046(-0.3619, 0.3526)  | 0.9797 | -0.0477                | -0.585(-0.9350, -0.2351)  | 0.0011 | -0.0466                  | -0.5711(-0.9209, -0.2213) | 0.0014 | -0.0486                 | -0.5957(-0.9468, -0.2446) | <0.001 | -0.0446                 | -0.5479(-0.9025, -0.1932) | 0.0025 |
|       | BMI→SBP          | 0.1289                 | 0.8359(0.6469, 1.0249)    | <0.001 | 0.1685                 | 1.0927(0.9088, 1.2766)    | <0.001 | 0.1682                   | 1.0905(0.9058, 1.2753)    | <0.001 | 0.1585                  | 1.0286(0.8395, 1.2176)    | <0.001 | 0.1441                  | 0.9366(0.7361, 1.1371)    | <0.001 |
|       | Total effect     | -0.0144                | -0.1761(-0.5342, 0.182)   | 0.3350 | -0.0601                | -0.736(-1.0902, -0.3817)  | <0.001 | -0.0586                  | -0.7178(-1.0719, -0.3638) | <0.001 | -0.0599                 | -0.7337(-1.0883, -0.3791) | <0.001 | -0.0515                 | -0.6314(-0.9889, -0.2739) | <0.001 |
| Path3 | Menarche age→WC  | -0.0837                | -0.4928(-0.6642, -0.3213) | <0.001 | -0.0910                | -0.5355(-0.7107, -0.3602) | <0.001 | -0.0896                  | -0.5275(-0.7024, -0.3526) | <0.001 | -0.0898                 | -0.5285(-0.7026, -0.3545) | <0.001 | -0.0696                 | -0.4085(-0.5778, -0.2392) | <0.001 |
|       | Menarche age→DBP | -0.0454                | -0.2589(-0.4232, -0.0945) | 0.0020 | -0.0456                | -0.26(-0.4288, -0.0912)   | 0.0025 | -0.0437                  | -0.2491(-0.4178, -0.0805) | 0.0038 | -0.0452                 | -0.2571(-0.4257, -0.0884) | 0.0028 | -0.0373                 | -0.2118(-0.3811, -0.0424) | 0.0143 |
|       | WC→DBP           | 0.1789                 | 0.1733(0.1454, 0.2013)    | <0.001 | -0.1810                | 0.1754(0.1473, 0.2034)    | <0.001 | 0.1787                   | 0.1732(0.1451, 0.2013)    | <0.001 | 0.1705                  | 0.1647(0.1363, 0.1931)    | <0.001 | 0.1445                  | 0.1399(0.1104, 0.1695)    | <0.001 |
|       | Total effect     | -0.0604                | -0.3443(-0.5107, -0.1779) | <0.001 | -0.0620                | -0.3539(-0.5248, -0.183)  | <0.001 | -0.0597                  | -0.3405(-0.5112, -0.1698) | <0.001 | -0.0606                 | -0.3441(-0.5145, -0.1737) | <0.001 | -0.0474                 | -0.2689(-0.4395, -0.0984) | 0.0020 |
| Path4 | Menarche age→WC  | -0.0849                | -0.4944(-0.6658, -0.323)  | <0.001 | -0.0914                | -0.5376(-0.7129, -0.3624) | <0.001 | -0.0901                  | -0.5299(-0.7048, -0.355)  | <0.001 | -0.0904                 | -0.531(-0.7051, -0.357)   | <0.001 | -0.0702                 | -0.4111(-0.5803, -0.2417) | <0.001 |
|       | Menarche age→SBP | 0.0004                 | 0.0044(-0.3439, 0.3526)   | 0.9804 | -0.0468                | -0.5643(-0.9094, -0.2192) | 0.0014 | -0.0459                  | -0.5533(-0.8983, -0.2082) | 0.0017 | -0.0481                 | -0.5792(-0.9255, -0.233)  | 0.0010 | -0.0433                 | -0.5228(-0.8721, -0.1735) | 0.0034 |
|       | WC→SBP           | 0.1772                 | 0.3632(0.3040, 0.4224)    | <0.001 | 0.1574                 | 0.3226(0.2652, 0.38)      | <0.001 | 0.1538                   | 0.3151(0.2576, 0.3727)    | <0.001 | 0.1436                  | 0.2942(0.2358, 0.3526)    | <0.001 | 0.1290                  | 0.2655(0.2045, 0.3266)    | <0.001 |
|       | Total effect     | -0.0145                | -0.1752(-0.5277, 0.1773)  | 0.3300 | -0.0612                | -0.7377(-1.086, -0.3894)  | <0.001 | -0.0598                  | -0.7202(-1.0683, -0.3722) | <0.001 | -0.0611                 | -0.7354(-1.084, -0.3869)  | <0.001 | -0.0524                 | -0.632(-0.9832, -0.2807)  | <0.001 |

CVDs: cardiovascular diseases; LDL-C: low-density lipoprotein cholesterol; HDL-C: high-density lipoprotein cholesterol; TG: triglycerides; HbA1c: Hemoglobin A1C; Scr: serum creatinine; SUA: serum uric acid; BMI: body mass index; WC: waist circle; DBP: diastolic blood pressure; SBP: systolic blood pressure; Un-standardized: B, standardized coefficients,  $\beta$ .  
 Path1: Mediation effect of BMI on the relationship between age at menarche and DBP.  
 Path2: Mediation effect of BMI on the relationship between age at menarche and SBP.  
 Path3: Mediation effect of WC on the relationship between age at menarche and DBP.  
 Path4: Mediation effect of WC on the relationship between age at menarche and SBP.  
<sup>a</sup> Unadjusted;  
<sup>b</sup> Adjusted for age, educational attainment, marital status, region;  
<sup>c</sup> Adjusted for age, educational attainment, marital status, region, cigarette smoking, alcohol consumption, eating habits, entertainment, the experience of a traumatic event, physical activity;  
<sup>d</sup> Adjusted for age, educational attainment, marital status, region, cigarette smoking, alcohol consumption, eating habits, entertainment, the experience of a traumatic event, physical activity, history of CVDs, hepatitis history, history of antilipidemic medication, history of antidiabetic medication;  
<sup>e</sup> Adjusted for age, educational attainment, marital status, region, cigarette smoking, alcohol consumption, eating habits, entertainment, the experience of a traumatic event, physical activity, history of CVDs, hepatitis history, history of antilipidemic medication, history of antidiabetic medication, LDL-C, HDL-C, TG, HbA1c, Scr, SUA.

## DISCUSSION

In the study, we attempted to explore the association between age of menarche and BP and examined the moderating and mediating effect of obesity parameters (BMI and WC) on the association. We have found that the interaction term of obesity parameters\*age of menarche was not significant for predicting BP. It was also important to note that WC and BMI partly mediated the association between age of menarche and BP. The results of our study were partly constant with most previous studies. And so previous studies had only focus on the relationship between earlier biological maturation and health outcomes in late adolescence and adulthood. Most of the previous studies meant exactly that: earlier biological maturation was at a higher risk for health outcomes in late adolescence and adulthood. Furthermore, most previous studies found that early biological maturation (age of menarche) or puberty was significantly related to obesity parameters[33-37], hypertension[37-40], and metabolic syndrome[41-49]. In general, our results were mostly consistent with the results of previous studies that suggest that earlier biological maturation is a risk factor for several negative health outcomes in late adolescence and adulthood.

Our study suggested the likelihood of a dose-response relationship between age of menarche and obesity parameters (BMI and WC). The relationship could be identified by the fact that early-maturing girls already have more adiposity before menarche, given that fatty tissue, through leptin release, has a crucial role in the initiation of the biological maturation process[50-51]. Early maturing girls could maintain their higher fatty tissue in adulthood[52]. Another mechanism may also be associated with the time of the maturation process. It has been reported that early maturing girls could experience a more accelerated maturation process than late maturing ones. Thus, more significant interference with biological maturation in girls can lead to increased more fatty tissue[53]. We also found a significantly negative relationship between age at menarche and BP in mid-aged and elderly Chinese women. However, this association did not exist between the age of menarche and SBP before adjusting the related confounders. This result is consistent with previous findings[54-62] regarding the age of menarche as a cardiovascular risk factor. The weak association between age at menarche and BP in adulthood could, in part, be explained by the fact that early matures were younger than women with late menarche. This result could be an expression of the fact that BP is an outcome with a higher latency period than obesity. Moreover, among women who already entered menopause in our study, the effects of menarche could be even weaker, as results suggest, and obesity could have more effect on BP. We also found that women with a higher age of menarche had higher HDL-C

1 level but had lower DBP level. The results of the current study were quite consistent with those of  
2  
3 [55] Feng Y, *et al.* Increased body fat, especially abdominal fat, partially explained the increased  
4  
5 insulin resistance and dyslipidemia in women with early menarche age. Therefore, obesity in  
6  
7 adolescence, sociodemographic, or even behavioral factors through life (including age, educational  
8  
9 attainment, marital status, region, smoking status, alcohol consumption, eating habits, entertainment,  
10  
11 the experience of a traumatic event, physical activity) were potential mediators to target when  
12  
13 interventions for BP control and management.

14  
15 Though so many studies have explored the association analysis between the age of menarche or  
16  
17 obesity parameters and BP, there were only two studies[63 64] that explored the mediating effect of  
18  
19 obesity parameters on the relation between age of menarche and BP. Zhang L, *et al.* [63] found that  
20  
21 the relationship between age of menarche and DBP was partly mediated by WC. In contrast, the  
22  
23 relationship between age of menarche and SBP was fully mediated by WC in women. Werneck AO,  
24  
25 *et al.* [64] showed that women with late menarche are less likely to have a risk of hypertension, and  
26  
27 BMI was an important mediator of the age at the menarche-hypertension association.  
28  
29 Interestingly, we found that obesity parameters partly mediated the relationship between the age of  
30  
31 menarche and BP in women. The difference between our research and others may due to the different  
32  
33 populations, different definitions of early and later menarche, and different confounding  
34  
35 variables by controlling. The individuals in our study were mid-aged and elderly Chinese women,  
36  
37 where the mean age at recruitment and age of menarche were older than in the Werneck AO, *et al.*'s  
38  
39 study[64], and the level of socio-economic development also made some contribution to  
40  
41 ontogenetic development. In addition, other studies and a meta-analysis[54 56 62 65-67] reported an  
42  
43 inverse association between early age of menarche and hypertension, which was not observed in  
44  
45 Zhang L, *et al.*'s study[63]. They found no direct relationship between the age of menarche and DBP,  
46  
47 and we have found a direct relationship between the age of menarche and DBP. The participants were  
48  
49 similar in China and its socio-economic background, this phenomenon could be explained by the  
50  
51 cumulative effect, which showed a significantly negative association between age of menarche and  
52  
53 DBP over life-span.

54  
55 There were several limitations to the study. The main limitations of our research are related to the  
56  
57 cross-sectional study and the self-reported method used for the assessment of age at menarche and  
58  
59 most related confounders. BP in our study was measured at home by professionally trained volunteers,  
60  
and the next step is the use of clinical BP and ambulatory blood pressure. However, this is the first

1 large population study to examine the moderation between the age of menarche and obesity  
2 parameters in predicting BP in middle-aged and elderly Chinese, as well as the mediation effects of  
3 obesity parameters on the relationship between age of menarche and BP. Moreover, a significant  
4 strength of the study is a large sample of 4513 middle-aged and older Chinese. The results presented  
5 in this article represent the baseline data that could be explored further in prospective cohort studies.  
6  
7  
8  
9

10  
11 In sum, the interaction term of obesity parameters\*age of menarche was not significant for  
12 predicting either DBP or SBP in women. Moreover, obesity parameters partly mediated the  
13 relationship between the age of menarche and BP.  
14  
15  
16  
17

## 18 **CONCLUSIONS**

19  
20 The interaction term of obesity parameters\*age of menarche was not significant for predicting either  
21 DBP or SBP in women. Moreover, Obesity parameters partly mediated the relationship between age  
22 of menarche and BP.  
23  
24  
25  
26

## 27 **Author affiliations**

28  
29 <sup>1</sup> Department of Internal Medicine Nursing, School of Nursing, Wannan Medical College, 22  
30 Wenchang West Road, Higher Education Park, Wuhu City, An Hui Province, P.R.China

31  
32 <sup>2</sup> Obstetrics and Gynecology Nursing, School of Nursing, Wannan Medical College, 22 Wenchang  
33 West Road, Higher Education Park, Wuhu City, An Hui Province, P.R.China

34  
35 <sup>3</sup>Department of Pediatric Nursing, School of Nursing, Wannan Medical College, 22 Wenchang West  
36 Road, Higher Education Park, Wuhu City, An Hui Province, P.R.China

37  
38 <sup>4</sup>Department of Surgical Nursing, School of Nursing, Wannan Medical College, 22 Wenchang West  
39 Road, Higher Education Park, Wuhu City, An Hui Province, P.R.China

40  
41 <sup>5</sup>Department of Emergency and Critical Care Nursing, School of Nursing, Wannan Medical College,  
42 22 Wenchang West Road, Higher Education Park, Wuhu City, An Hui Province, P.R.China

43  
44 <sup>6</sup>Rehabilitation Nursing, School of Nursing, Wanna Medical college, 22 Wenchang West Road,  
45 Higher Education Park, Wuhu City, An Hui Province, P.R.China

46  
47 <sup>7</sup>Department of nursing, Yijishan Hospital, the First Affiliated Hospital of Wannan Medical College,  
48 Zheshan West Road, Yijishan District, Wuhu City, Anhui Province  
49  
50  
51  
52  
53  
54  
55

## 56 **Abbreviations**

57  
58 BMI, body mass index; BP, blood pressure; Confidence intervals, CIs; CDC, Centers for Disease  
59 Control and Prevention; CHARLS, China Health and Retirement Longitudinal Study; CVDs,  
60

1 cardiovascular diseases; DBP, diastolic blood pressure; HDL, high-density lipoprotein; Hemoglobin  
2 A1C, HbA1c; LDL, low-density lipoprotein; M, mean; NSFC, The National Natural Science  
3 Foundation of China; National Institute on Aging, NIA; SBP, systolic blood pressure; SUA, serum  
4 uric acid; standard error, SE; unstandardized, B; standardized coefficients,  $\beta$ ; Scr, serum creatinine;  
5 SD, standard deviation; TG, triglycerides; urinalysis, UA; World Bank, WB; waist circle, WC; World  
6 Health Organization, WHO.  
7  
8  
9  
10  
11

### 12 **Acknowledgements**

13 We are grateful to the China Center for Economic Research, and we also thank all participants for  
14 their contribution and members of the research for collecting the data.  
15  
16  
17

### 18 **Author contributions**

19 Conceived and designed the research: LZ. Wrote the paper: LZ. Analyzed the data: LZ. Revised the  
20 paper: LZ, L Y, C-z W, TY, Dm Z, H-h W, JL, Y-x L, LS, X-p L, YH, H-y C, and Y-z L.  
21  
22  
23

### 24 **Funding**

25 CHARLS was supported by the NSFC (70910107022, 71130002) and National Institute on Aging  
26 (R03-TW008358-01; R01-AG037031-03S1), and World Bank (7159234) and the publication fee was  
27 supported by the Support Program for Outstanding Young Talents from the Universities and Colleges  
28 of Anhui Province for Lin Zhang(gxyqZD2021118).  
29  
30  
31  
32  
33

### 34 **Disclosure**

35 The authors declare that there is no potential conflict of interest relevant to the research.  
36  
37

### 38 **Patient consent**

39 Completion of all authors declaration and consent to publish form is required.  
40  
41

### 42 **Ethics approval and consent to participate**

43 Ethics approval for the research was granted by the Ethics Review Committee of Peking University,  
44 and all participants provided informed consent. Approval for this study was given by the medical  
45 ethics committee of Wannan medical college (approval number 2021–3).  
46  
47  
48

### 49 **Data sharing**

50 Data sharing statement Extra data can be accessed via [http://charls.pku.edu.cn/pages/data/111/zh-](http://charls.pku.edu.cn/pages/data/111/zh-cn.html)  
51 [cn.html](http://charls.pku.edu.cn/pages/data/111/zh-cn.html).  
52  
53  
54  
55  
56  
57  
58  
59  
60

1  
2  
3  
4  
5  
6  
7  
8  
9  
10  
11  
12  
13  
14  
15  
16  
17  
18  
19  
20  
21  
22  
23  
24  
25  
26  
27  
28  
29  
30  
31  
32  
33  
34  
35  
36  
37  
38  
39  
40  
41  
42  
43  
44  
45  
46  
47  
48  
49  
50  
51  
52  
53  
54  
55  
56  
57  
58  
59  
60

## References

1. Tian S, Xu Y, Dong H. The effect of metabolic health and obesity phenotypes on risk of hypertension: A nationwide population-based study using 5 representative definitions of metabolic health. *Medicine (Baltimore)* 2018;**97**(38):e12425 doi: 10.1097/MD.00000000000012425[published Online First: Epub Date]].
2. Abdulsalam S, Olugbenga-Bello A, Olarewaju O, et al. Sociodemographic correlates of modifiable risk factors for hypertension in a rural local government area of oyo state South west Nigeria. *Int J Hypertens* 2014;**2014**:842028 doi: 10.1155/2014/842028[published Online First: Epub Date]].
3. Ke L, Ho J, Feng J, et al. Modifiable risk factors including sunlight exposure and fish consumption are associated with risk of hypertension in a large representative population from Macau. *J Steroid Biochem Mol Biol* 2014;**144 Pt A**:152-5 doi: 10.1016/j.jsbmb.2013.10.019[published Online First: Epub Date]].
4. Ibekwe R. Modifiable Risk factors of Hypertension and Socio-demographic Profile in Oghara, Delta State; Prevalence and Correlates. *Ann Med Health Sci Res* 2015;**5**(1):71-7 doi: 10.4103/2141-9248.149793[published Online First: Epub Date]].
5. Pilakkadavath Z, Shaffi M. Modifiable risk factors of hypertension: A hospital-based case-control study from Kerala, India. *J Family Med Prim Care* 2016;**5**(1):114-9 doi: 10.4103/2249-4863.184634[published Online First: Epub Date]].
6. Mamudu HM, Paul TK, Wang L, et al. Association Between Multiple Modifiable Risk Factors of Cardiovascular Disease and Hypertension among Asymptomatic Patients in Central Appalachia. *South Med J* 2017;**110**(2):90-96 doi: 10.14423/SMJ.0000000000000602[published Online First: Epub Date]].
7. Collaboration NCDRF. Worldwide trends in blood pressure from 1975 to 2015: a pooled analysis of 1479 population-based measurement studies with 19.1 million participants. *Lancet* 2017;**389**(10064):37-55 doi: 10.1016/S0140-6736(16)31919-5[published Online First: Epub Date]].
8. Bromfield S, Muntner P. High blood pressure: the leading global burden of disease risk factor and the need for worldwide prevention programs. *Curr Hypertens Rep* 2013;**15**(3):134-6 doi: 10.1007/s11906-013-0340-9[published Online First: Epub Date]].
9. Mahajan S, Zhang D, He S, et al. Prevalence, Awareness, and Treatment of Isolated Diastolic Hypertension: Insights From the China PEACE Million Persons Project. *J Am Heart Assoc* 2019;**8**(19):e012954 doi: 10.1161/JAHA.119.012954[published Online First: Epub Date]].
10. Cloutier L, Morris D, Bruneau J, et al. World Health Organization celebrates World Health Day, April 7, 2013--focusing on hypertension. *Canadian journal of cardiovascular nursing = Journal canadien en soins infirmiers cardio-vasculaires* 2013;**23**(2):9-11
11. Webb MS. Stress management strategies in hypertension control. *Ethnicity & disease* 2002;**12**(4):S3-95-100
12. Kotchen TA. The search for strategies to control hypertension. *Circulation* 2010;**122**(12):1141-3 doi: 10.1161/CIRCULATIONAHA.110.978759[published Online First: Epub Date]].
13. Mancia G, Rea F, Cuspidi C, et al. Blood pressure control in hypertension. Pros and cons of available treatment strategies. *Journal of hypertension* 2017;**35**(2):225-33 doi: 10.1097/HJH.0000000000001181[published Online First: Epub Date]].
14. Werneck AO, Silva DR, Souza MF, et al. Correlates of Blood Pressure According to Early, On Time, and Late Maturation in Adolescents. *Journal of clinical hypertension* 2016;**18**(5):424-30 doi: 10.1111/jch.12699[published Online First: Epub Date]].
15. Widen E, Silventoinen K, Sovio U, et al. Pubertal timing and growth influences cardiometabolic risk factors in adult males and females. *Diabetes care* 2012;**35**(4):850-6 doi: 10.2337/dc11-1365[published Online First: Epub Date]].
16. Mueller NT, Duncan BB, Barreto SM, et al. Earlier age at menarche is associated with higher diabetes risk and



- cardiometabolic disease risk factors in Brazilian adults: Brazilian Longitudinal Study of Adult Health (ELSA-Brasil). *Cardiovasc Diabetol* 2014;**13**:22 doi: 10.1186/1475-2840-13-22[published Online First: Epub Date]].
17. Dreyfus J, Jacobs DR, Jr., Mueller N, et al. Age at Menarche and Cardiometabolic Risk in Adulthood: The Coronary Artery Risk Development in Young Adults Study. *J Pediatr* 2015;**167**(2):344-52 e1 doi: 10.1016/j.jpeds.2015.04.032[published Online First: Epub Date]].
18. Cao M, Cui B. Negative Effects of Age at Menarche on Risk of Cardiometabolic Diseases in Adulthood: A Mendelian Randomization Study. *The Journal of clinical endocrinology and metabolism* 2020;**105**(2) doi: 10.1210/clinem/dgz071[published Online First: Epub Date]].
19. Power C, Lake JK, Cole TJ. Body mass index and height from childhood to adulthood in the 1958 British born cohort. *The American journal of clinical nutrition* 1997;**66**(5):1094-101 doi: 10.1093/ajcn/66.5.1094[published Online First: Epub Date]].
20. Adair LS, Gordon-Larsen P. Maturation timing and overweight prevalence in US adolescent girls. *American journal of public health* 2001;**91**(4):642-4 doi: 10.2105/ajph.91.4.642[published Online First: Epub Date]].
21. Must A, Naumova EN, Phillips SM, et al. Childhood overweight and maturational timing in the development of adult overweight and fatness: the Newton Girls Study and its follow-up. *Pediatrics* 2005;**116**(3):620-7 doi: 10.1542/peds.2004-1604[published Online First: Epub Date]].
22. Li C, Liu T, Sun W, et al. Prevalence and risk factors of arthritis in a middle-aged and older Chinese population: the China health and retirement longitudinal study. *Rheumatology* 2015;**54**(4):697-706 doi: 10.1093/rheumatology/keu391[published Online First: Epub Date]].
23. Zhang L, Yang L, Wang C, et al. Individual and combined association analysis of famine exposure and serum uric acid with hypertension in the mid-aged and older adult: a population-based cross-sectional study. *BioMed research international* 2021;**21**(1):420 doi: 10.1155/2021/5594718  
10.1186/s12872-021-02230-z[published Online First: Epub Date]].
24. Zhang L, Yang L, Wang C, et al. Combined Effect of Famine Exposure and Obesity Parameters on Hypertension in the Midaged and Older Adult: A Population-Based Cross-Sectional Study. 2021;**2021**:5594718 doi: 10.1155/2021/5594718[published Online First: Epub Date]].
25. Zhang L, Li JL, Zhang LL, et al. Body mass index and serum uric acid level: Individual and combined effects on blood pressure in middle-aged and older individuals in China. *Medicine (Baltimore)* 2020;**99**(9):e19418 doi: 10.1097/MD.000000000019418[published Online First: Epub Date]].
26. Zhang L, Li JL, Zhang LL, et al. Relationship between adiposity parameters and cognition: the "fat and jolly" hypothesis in middle-aged and elderly people in China. *Medicine* 2019;**98**(10) doi: ARTN e14747  
10.1097/MD.000000000014747[published Online First: Epub Date]].
27. Zhang L, Li JL, Zhang LL, et al. Association and Interaction Analysis of Body Mass Index and Triglycerides Level with Blood Pressure in Elderly Individuals in China. *BioMed research international* 2018;**2018**:8934534 doi: 10.1155/2018/8934534[published Online First: Epub Date]].
28. Zhang L, Li JL, Zhang LL, et al. No association between C-reactive protein and depressive symptoms among the middle-aged and elderly in China Evidence from the China Health and Retirement Longitudinal Study. *Medicine* 2018;**97**(38) doi: ARTN e12352  
10.1097/MD.000000000012352[published Online First: Epub Date]].
29. Zhang L, Liu K, Li H, et al. Relationship between body mass index and depressive symptoms: the "fat and jolly" hypothesis for the middle-aged and elderly in China. *BMC public health* 2016;**16**(1):1201 doi: 10.1186/s12889-016-3864-5[published Online First: Epub Date]].
30. Hayes AF, Preacher KJ. Quantifying and Testing Indirect Effects in Simple Mediation Models When the Constituent Paths Are Nonlinear. *Multivariate Behav Res* 2010;**45**(4):627-60 doi: 10.1080/00273171.2010.498290[published Online First: Epub Date]].
31. Hayes AF, Preacher KJ. Statistical mediation analysis with a multicategorical independent variable. *Br J Math Stat*



- 1 Psychol 2014;**67**(3):451-70 doi: 10.1111/bmsp.12028[published Online First: Epub Date]].
- 2 32. Hayes AF. An Index and Test of Linear Moderated Mediation. *Multivariate Behav Res* 2015;**50**(1):1-22 doi:
- 3 10.1080/00273171.2014.962683[published Online First: Epub Date]].
- 4 33. Shrestha A, Olsen J, Ramlau-Hansen CH, et al. Obesity and age at menarche. *Fertil Steril* 2011;**95**(8):2732-4 doi:
- 5 10.1016/j.fertnstert.2011.02.020[published Online First: Epub Date]].
- 6 34. Bralic I, Tahirovic H, Matanic D, et al. Association of early menarche age and overweight/obesity. *J Pediatr Endocrinol*
- 7 *Metab* 2012;**25**(1-2):57-62 doi: 10.1515/jpem-2011-0277[published Online First: Epub Date]].
- 8 35. Leitao RB, Rodrigues LP, Neves L, et al. Development of adiposity, obesity and age at menarche: an 8-year follow-up
- 9 study in Portuguese schoolgirls. *International journal of adolescent medicine and health* 2013;**25**(1):55-63 doi:
- 10 10.1515/ijamh-2013-0007[published Online First: Epub Date]].
- 11 36. Gallicchio L, Flaws JA, Smith RL. Age at menarche, androgen concentrations, and midlife obesity: findings from the
- 12 Midlife Women's Health Study. *Menopause* 2016;**23**(11):1182-88 doi:
- 13 10.1097/GME.0000000000000691[published Online First: Epub Date]].
- 14 37. Liu G, Yang Y, Huang W, et al. Association of age at menarche with obesity and hypertension among southwestern
- 15 Chinese women: a new finding. *Menopause* 2018;**25**(5):546-53 doi:
- 16 10.1097/GME.0000000000001027[published Online First: Epub Date]].
- 17 38. Zhou W, Wang T, Zhu L, et al. Association between Age at Menarche and Hypertension among Females in Southern
- 18 China: A Cross-Sectional Study. *Int J Hypertens* 2019;**2019**:9473182 doi: 10.1155/2019/9473182[published
- 19 Online First: Epub Date]].
- 20 39. Shen L, Wang L, Hu Y, et al. Associations of the ages at menarche and menopause with blood pressure and
- 21 hypertension among middle-aged and older Chinese women: a cross-sectional analysis of the baseline data of
- 22 the China Health and Retirement Longitudinal Study. *Hypertension research : official journal of the Japanese*
- 23 *Society of Hypertension* 2019;**42**(5):730-38 doi: 10.1038/s41440-019-0235-5[published Online First: Epub
- 24 Date]].
- 25 40. Guo L, Peng C, Xu H, et al. Age at menarche and prevention of hypertension through lifestyle in young Chinese adult
- 26 women: result from project ELEFANT. *BMC Womens Health* 2018;**18**(1):182 doi: 10.1186/s12905-018-0677-
- 27 y[published Online First: Epub Date]].
- 28 41. Stockl D, Meisinger C, Peters A, et al. Age at menarche and its association with the metabolic syndrome and its
- 29 components: results from the KORA F4 study. *PloS one* 2011;**6**(10):e26076 doi:
- 30 10.1371/journal.pone.0026076[published Online First: Epub Date]].
- 31 42. Chang CJ, Lai MM, Lin CC, et al. Age at menarche and its association with the metabolic syndrome in Taiwan. *Obesity*
- 32 *research & clinical practice* 2016;**10 Suppl 1**:S26-S34 doi: 10.1016/j.orcp.2015.10.003[published Online First:
- 33 Epub Date]].
- 34 43. Heys M, Schooling CM, Jiang C, et al. Age of menarche and the metabolic syndrome in China. *Epidemiology*
- 35 **2007**;**18**(6):740-6 doi: 10.1097/EDE.0b013e3181567faf[published Online First: Epub Date]].
- 36 44. Yoo S, Hwang YS. Age-Group Related Cohort Effects on the Association between Age at Menarche and Metabolic
- 37 Syndrome among Korean Premenopausal Women. *Korean journal of family medicine* 2019;**40**(4):280-81 doi:
- 38 10.4082/kjfm.19.0045[published Online First: Epub Date]].
- 39 45. Akter S, Jesmin S, Islam M, et al. Association of age at menarche with metabolic syndrome and its components in
- 40 rural Bangladeshi women. *Nutr Metab (Lond)* 2012;**9**(1):99 doi: 10.1186/1743-7075-9-99[published Online
- 41 First: Epub Date]].
- 42 46. Glueck CJ, Morrison JA, Wang P, et al. Early and late menarche are associated with oligomenorrhea and predict
- 43 metabolic syndrome 26 years later. *Metabolism: clinical and experimental* 2013;**62**(11):1597-606 doi:
- 44 10.1016/j.metabol.2013.07.005[published Online First: Epub Date]].
- 45 47. Kim Y, Je Y. Early Menarche and Risk of Metabolic Syndrome: A Systematic Review and Meta-Analysis. *Journal of*
- 46 *women's health* 2019;**28**(1):77-86 doi: 10.1089/jwh.2018.6998[published Online First: Epub Date]].
- 47
- 48
- 49
- 50
- 51
- 52
- 53
- 54
- 55
- 56
- 57
- 58
- 59
- 60

- 1 48. Farahmand M, Ramezani Tehrani F, Behboudi Gandevani S, et al. Is There any Association between Age at Menarche  
2 and Risk of Metabolic Syndrome? The Tehran Lipid & Glucose Study. *Arch Iran Med* 2019;**22**(9):495-500  
3
- 4 49. Hwang YS, Park EJ, Choi JG, et al. Relationship between Age at Menarche and Metabolic Syndrome in Premenopausal  
5 Women: Korea National Health and Nutrition Examination Survey 2013-2014. *Korean journal of family  
6 medicine* 2018;**39**(5):300-06 doi: 10.4082/kjfm.17.0022[published Online First: Epub Date]].  
7
- 8 50. Ahmed ML, Ong KK, Dunger DB. Childhood obesity and the timing of puberty. *Trends Endocrinol Metab*  
9 2009;**20**(5):237-42 doi: 10.1016/j.tem.2009.02.004[published Online First: Epub Date]].  
10
- 11 51. Jasik CB, Lustig RH. Adolescent obesity and puberty: the "perfect storm". *Ann N Y Acad Sci* 2008;**1135**:265-79 doi:  
12 10.1196/annals.1429.009[published Online First: Epub Date]].  
13
- 14 52. Garn SM. Continuities and changes in fatness from infancy through adulthood. *Curr Probl Pediatr* 1985;**15**(2):1-47  
15 doi: 10.1016/0045-9380(85)90015-5[published Online First: Epub Date]].  
16
- 17 53. van Lenthe FJ, Kemper CG, van Mechelen W. Rapid maturation in adolescence results in greater obesity in adulthood:  
18 the Amsterdam Growth and Health Study. *The American journal of clinical nutrition* 1996;**64**(1):18-24 doi:  
19 10.1093/ajcn/64.1.18[published Online First: Epub Date]].  
20
- 21 54. Remsberg KE, Demerath EW, Schubert CM, et al. Early menarche and the development of cardiovascular disease risk  
22 factors in adolescent girls: the Fels Longitudinal Study. *The Journal of clinical endocrinology and metabolism*  
23 2005;**90**(5):2718-24 doi: 10.1210/jc.2004-1991[published Online First: Epub Date]].  
24
- 25 55. Feng Y, Hong X, Wilker E, et al. Effects of age at menarche, reproductive years, and menopause on metabolic risk  
26 factors for cardiovascular diseases. *Atherosclerosis* 2008;**196**(2):590-7 doi:  
27 10.1016/j.atherosclerosis.2007.06.016[published Online First: Epub Date]].  
28
- 29 56. Won JC, Hong JW, Noh JH, et al. Association Between Age at Menarche and Risk Factors for Cardiovascular Diseases  
30 in Korean Women: The 2010 to 2013 Korea National Health and Nutrition Examination Survey. *Medicine  
31 (Baltimore)* 2016;**95**(18):e3580 doi: 10.1097/MD.0000000000003580[published Online First: Epub Date]].  
32
- 33 57. Au Yeung SL, Jiang C, Cheng KK, et al. Age at menarche and cardiovascular risk factors using Mendelian randomization  
34 in the Guangzhou Biobank Cohort Study. *Preventive medicine* 2017;**101**:142-48 doi:  
35 10.1016/j.ypmed.2017.06.006[published Online First: Epub Date]].  
36
- 37 58. Ley SH, Li Y, Tobias DK, et al. Duration of Reproductive Life Span, Age at Menarche, and Age at Menopause Are  
38 Associated With Risk of Cardiovascular Disease in Women. *J Am Heart Assoc* 2017;**6**(11) doi:  
39 10.1161/JAHA.117.006713[published Online First: Epub Date]].  
40
- 41 59. Luijken J, van der Schouw YT, Mensink D, et al. Association between age at menarche and cardiovascular disease: A  
42 systematic review on risk and potential mechanisms. *Maturitas* 2017;**104**:96-116 doi:  
43 10.1016/j.maturitas.2017.07.009[published Online First: Epub Date]].  
44
- 45 60. Yang L, Li L, Millwood IY, et al. Age at menarche and risk of major cardiovascular diseases: Evidence of birth cohort  
46 effects from a prospective study of 300,000 Chinese women. *International journal of cardiology* 2017;**227**:497-  
47 502 doi: 10.1016/j.ijcard.2016.10.115[published Online First: Epub Date]].  
48
- 49 61. Chen X, Liu Y, Sun X, et al. Age at menarche and risk of all-cause and cardiovascular mortality: a systematic review  
50 and dose-response meta-analysis. *Menopause* 2018;**26**(6):670-76 doi:  
51 10.1097/GME.0000000000001289[published Online First: Epub Date]].  
52
- 53 62. Lee JJ, Cook-Wiens G, Johnson BD, et al. Age at Menarche and Risk of Cardiovascular Disease Outcomes: Findings  
54 From the National Heart Lung and Blood Institute-Sponsored Women's Ischemia Syndrome Evaluation. *J Am  
55 Heart Assoc* 2019;**8**(12):e012406 doi: 10.1161/JAHA.119.012406[published Online First: Epub Date]].  
56
- 57 63. Zhang L, Li Y, Zhou W, et al. Mediation effect of BMI on the relationship between age at menarche and hypertension:  
58 The Henan Rural Cohort Study. *Journal of human hypertension* 2019 doi: 10.1038/s41371-019-0247-  
59 2[published Online First: Epub Date]].  
60
64. Werneck AO, Oyeyemi AL, Cyrino ES, et al. Association between age at menarche and blood pressure in adulthood:  
is obesity an important mediator? *Hypertension research : official journal of the Japanese Society of*

- 1 Hypertension 2018;**41**(10):856-64 doi: 10.1038/s41440-018-0079-4[published Online First: Epub Date]].
- 2 65. Lakshman R, Forouhi NG, Sharp SJ, et al. Early age at menarche associated with cardiovascular disease and mortality.
- 3 The Journal of clinical endocrinology and metabolism 2009;**94**(12):4953-60 doi: 10.1210/jc.2009-
- 4 1789[published Online First: Epub Date]].
- 5
- 6 66. Charalampopoulos D, McLoughlin A, Elks CE, et al. Age at menarche and risks of all-cause and cardiovascular death:
- 7 a systematic review and meta-analysis. American journal of epidemiology 2014;**180**(1):29-40 doi:
- 8 10.1093/aje/kwu113[published Online First: Epub Date]].
- 9
- 10 67. Zheng Y, Zhang G, Chen Z, et al. Association between Age at Menarche and Cardiovascular Disease Risk Factors in
- 11 China: A Large Population-Based Investigation. Cardiorenal Med 2016;**6**(4):307-16 doi:
- 12 10.1159/000445506[published Online First: Epub Date]].
- 13
- 14
- 15
- 16
- 17
- 18
- 19
- 20
- 21
- 22
- 23
- 24
- 25
- 26
- 27
- 28
- 29
- 30
- 31
- 32
- 33
- 34
- 35
- 36
- 37
- 38
- 39
- 40
- 41
- 42
- 43
- 44
- 45
- 46
- 47
- 48
- 49
- 50
- 51
- 52
- 53
- 54
- 55
- 56
- 57
- 58
- 59
- 60

For peer review only

Fig. 1 Selection of participants

For peer review only

1  
2  
3  
4  
5  
6  
7  
8  
9  
10  
11  
12  
13  
14  
15  
16  
17  
18  
19  
20  
21  
22  
23  
24  
25  
26  
27  
28  
29  
30  
31  
32  
33  
34  
35  
36  
37  
38  
39  
40  
41  
42  
43  
44  
45  
46  
47  
48  
49  
50  
51  
52  
53  
54  
55  
56  
57  
58  
59  
60

1  
2  
3  
4  
5  
6  
7  
8  
9  
10  
11  
12  
13  
14  
15  
16  
17  
18  
19  
20  
21  
22  
23  
24  
25  
26  
27  
28  
29  
30  
31  
32  
33  
34  
35  
36  
37  
38  
39  
40  
41  
42  
43  
44  
45  
46  
47  
48  
49  
50  
51  
52  
53  
54  
55  
56  
57  
58  
59  
60

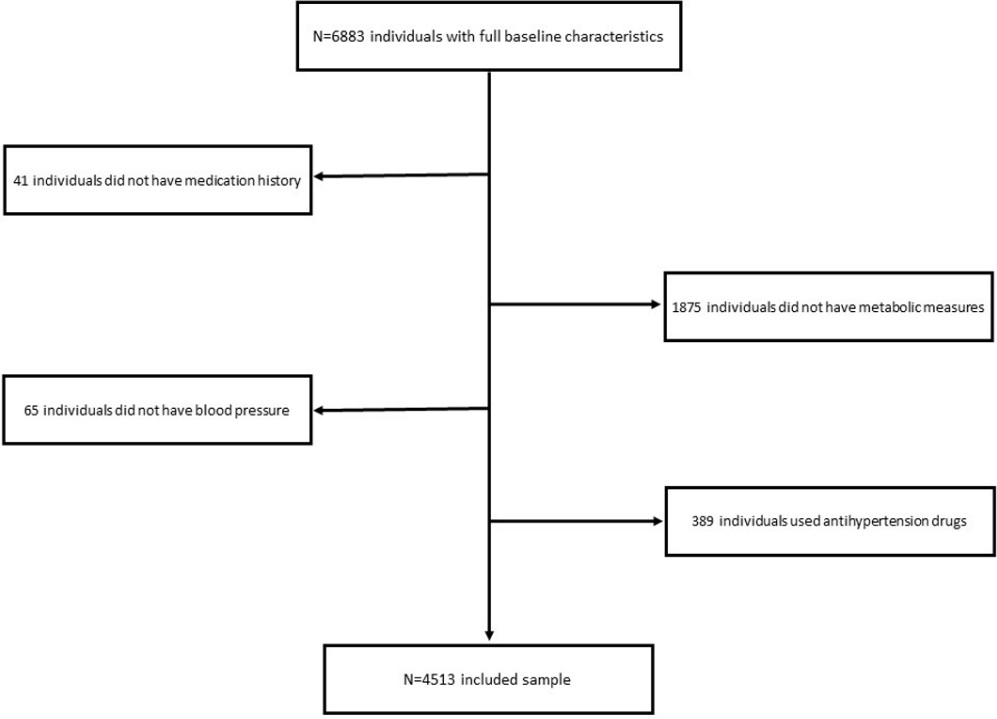

90x90mm (300 x 300 DPI)

**STROBE 2007 (v4) Statement—Checklist of items that should be included in reports of *cross-sectional studies***

| Section/Topic                | Item # | Recommendation                                                                                                                                                                       | Reported on page # |
|------------------------------|--------|--------------------------------------------------------------------------------------------------------------------------------------------------------------------------------------|--------------------|
| <b>Title and abstract</b>    | 1      | (a) Indicate the study's design with a commonly used term in the title or the abstract                                                                                               | 1                  |
|                              |        | (b) Provide in the abstract an informative and balanced summary of what was done and what was found                                                                                  | 2-3                |
| <b>Introduction</b>          |        |                                                                                                                                                                                      |                    |
| Background/rationale         | 2      | Explain the scientific background and rationale for the investigation being reported                                                                                                 | 4-5                |
| Objectives                   | 3      | State specific objectives, including any prespecified hypotheses                                                                                                                     | 5                  |
| <b>Methods</b>               |        |                                                                                                                                                                                      |                    |
| Study design                 | 4      | Present key elements of study design early in the paper                                                                                                                              | 6                  |
| Setting                      | 5      | Describe the setting, locations, and relevant dates, including periods of recruitment, exposure, follow-up, and data collection                                                      | 6                  |
| Participants                 | 6      | (a) Give the eligibility criteria, and the sources and methods of selection of participants                                                                                          | 7                  |
| Variables                    | 7      | Clearly define all outcomes, exposures, predictors, potential confounders, and effect modifiers. Give diagnostic criteria, if applicable                                             | 7-8                |
| Data sources/<br>measurement | 8*     | For each variable of interest, give sources of data and details of methods of assessment (measurement). Describe comparability of assessment methods if there is more than one group | 8                  |
| Bias                         | 9      | Describe any efforts to address potential sources of bias                                                                                                                            | 8                  |
| Study size                   | 10     | Explain how the study size was arrived at                                                                                                                                            | 7                  |
| Quantitative variables       | 11     | Explain how quantitative variables were handled in the analyses. If applicable, describe which groupings were chosen and why                                                         | 7                  |
| Statistical methods          | 12     | (a) Describe all statistical methods, including those used to control for confounding                                                                                                | 7-8                |
|                              |        | (b) Describe any methods used to examine subgroups and interactions                                                                                                                  | 7-8                |
|                              |        | (c) Explain how missing data were addressed                                                                                                                                          | 7-8                |
|                              |        | (d) If applicable, describe analytical methods taking account of sampling strategy                                                                                                   | 7-8                |
|                              |        | (e) Describe any sensitivity analyses                                                                                                                                                | 7-8                |
| <b>Results</b>               |        |                                                                                                                                                                                      |                    |

|                          |     |                                                                                                                                                                                                              |       |
|--------------------------|-----|--------------------------------------------------------------------------------------------------------------------------------------------------------------------------------------------------------------|-------|
| Participants             | 13* | (a) Report numbers of individuals at each stage of study—eg numbers potentially eligible, examined for eligibility, confirmed eligible, included in the study, completing follow-up, and analysed            | 9-10  |
|                          |     | (b) Give reasons for non-participation at each stage                                                                                                                                                         | 9-10  |
|                          |     | (c) Consider use of a flow diagram                                                                                                                                                                           | 9-10  |
| Descriptive data         | 14* | (a) Give characteristics of study participants (eg demographic, clinical, social) and information on exposures and potential confounders                                                                     | 10-13 |
|                          |     | (b) Indicate number of participants with missing data for each variable of interest                                                                                                                          | 10-13 |
| Outcome data             | 15* | Report numbers of outcome events or summary measures                                                                                                                                                         | 10-13 |
| Main results             | 16  | (a) Give unadjusted estimates and, if applicable, confounder-adjusted estimates and their precision (eg, 95% confidence interval). Make clear which confounders were adjusted for and why they were included | 13-16 |
|                          |     | (b) Report category boundaries when continuous variables were categorized                                                                                                                                    | 13-16 |
|                          |     | (c) If relevant, consider translating estimates of relative risk into absolute risk for a meaningful time period                                                                                             | 13-16 |
| Other analyses           | 17  | Report other analyses done—eg analyses of subgroups and interactions, and sensitivity analyses                                                                                                               |       |
| <b>Discussion</b>        |     |                                                                                                                                                                                                              |       |
| Key results              | 18  | Summarise key results with reference to study objectives                                                                                                                                                     | 17-19 |
| Limitations              | 19  | Discuss limitations of the study, taking into account sources of potential bias or imprecision. Discuss both direction and magnitude of any potential bias                                                   | 17-19 |
| Interpretation           | 20  | Give a cautious overall interpretation of results considering objectives, limitations, multiplicity of analyses, results from similar studies, and other relevant evidence                                   | 17-19 |
| Generalisability         | 21  | Discuss the generalisability (external validity) of the study results                                                                                                                                        | 17-19 |
| <b>Other information</b> |     |                                                                                                                                                                                                              |       |
| Funding                  | 22  | Give the source of funding and the role of the funders for the present study and, if applicable, for the original study on which the present article is based                                                | 20    |

\*Give information separately for cases and controls in case-control studies and, if applicable, for exposed and unexposed groups in cohort and cross-sectional studies.

**Note:** An Explanation and Elaboration article discusses each checklist item and gives methodological background and published examples of transparent reporting. The STROBE checklist is best used in conjunction with this article (freely available on the Web sites of PLoS Medicine at <http://www.plosmedicine.org/>, Annals of Internal Medicine at <http://www.annals.org/>, and Epidemiology at <http://www.epidem.com/>). Information on the STROBE Initiative is available at [www.strobe-statement.org](http://www.strobe-statement.org).

# BMJ Open

## Mediator or moderator? The role of obesity in the association between age at menarche and blood pressure in mid-aged and elderly Chinese: a population-based cross-sectional study

|                               |                                                                                                                                                                                                                                                                                                                                                                                                                                                                                                                                                                                                                                                                                                                                                                                                                                                                                                                                                                                                                                                                                                                                                                                                                                                                                                                                                                                                                                                                                                                                                                                                                                                                                                                                                                                                                                                                                                                                                                                                                                                                                                                                                                                                                                                                                                                                                                                                                                                                                                                                             |
|-------------------------------|---------------------------------------------------------------------------------------------------------------------------------------------------------------------------------------------------------------------------------------------------------------------------------------------------------------------------------------------------------------------------------------------------------------------------------------------------------------------------------------------------------------------------------------------------------------------------------------------------------------------------------------------------------------------------------------------------------------------------------------------------------------------------------------------------------------------------------------------------------------------------------------------------------------------------------------------------------------------------------------------------------------------------------------------------------------------------------------------------------------------------------------------------------------------------------------------------------------------------------------------------------------------------------------------------------------------------------------------------------------------------------------------------------------------------------------------------------------------------------------------------------------------------------------------------------------------------------------------------------------------------------------------------------------------------------------------------------------------------------------------------------------------------------------------------------------------------------------------------------------------------------------------------------------------------------------------------------------------------------------------------------------------------------------------------------------------------------------------------------------------------------------------------------------------------------------------------------------------------------------------------------------------------------------------------------------------------------------------------------------------------------------------------------------------------------------------------------------------------------------------------------------------------------------------|
| Journal:                      | <i>BMJ Open</i>                                                                                                                                                                                                                                                                                                                                                                                                                                                                                                                                                                                                                                                                                                                                                                                                                                                                                                                                                                                                                                                                                                                                                                                                                                                                                                                                                                                                                                                                                                                                                                                                                                                                                                                                                                                                                                                                                                                                                                                                                                                                                                                                                                                                                                                                                                                                                                                                                                                                                                                             |
| Manuscript ID                 | bmjopen-2021-051486.R2                                                                                                                                                                                                                                                                                                                                                                                                                                                                                                                                                                                                                                                                                                                                                                                                                                                                                                                                                                                                                                                                                                                                                                                                                                                                                                                                                                                                                                                                                                                                                                                                                                                                                                                                                                                                                                                                                                                                                                                                                                                                                                                                                                                                                                                                                                                                                                                                                                                                                                                      |
| Article Type:                 | Original research                                                                                                                                                                                                                                                                                                                                                                                                                                                                                                                                                                                                                                                                                                                                                                                                                                                                                                                                                                                                                                                                                                                                                                                                                                                                                                                                                                                                                                                                                                                                                                                                                                                                                                                                                                                                                                                                                                                                                                                                                                                                                                                                                                                                                                                                                                                                                                                                                                                                                                                           |
| Date Submitted by the Author: | 12-Apr-2022                                                                                                                                                                                                                                                                                                                                                                                                                                                                                                                                                                                                                                                                                                                                                                                                                                                                                                                                                                                                                                                                                                                                                                                                                                                                                                                                                                                                                                                                                                                                                                                                                                                                                                                                                                                                                                                                                                                                                                                                                                                                                                                                                                                                                                                                                                                                                                                                                                                                                                                                 |
| Complete List of Authors:     | <p>zhang, lin; Wannan Medical College, Department of Internal Medicine Nursing, School of Nursing, Wannan Medical College, 22 Wenchang West Road, Higher Education Park, Wuhu City, An Hui Province, P.R.China</p> <p>Yang, Liu; Wannan Medical College, Department of Internal Medicine Nursing, School of Nursing, Wannan Medical College, 22 Wenchang West Road, Higher Education Park, Wuhu City, An Hui Province, P.R.China</p> <p>Wang, Congzhi; Wannan Medical College, Department of Internal Medicine Nursing, School of Nursing, Wannan Medical College, 22 Wenchang West Road, Higher Education Park, Wuhu City, An Hui Province, P.R.China</p> <p>Yuan, Ting; Wannan Medical College, Obstetrics and Gynecology Nursing, School of Nursing, Wannan Medical College, 22 Wenchang West Road, Higher Education Park, Wuhu City, An Hui Province, P.R.China</p> <p>Zhang, Dongmei; Wannan Medical College, Department of Pediatric Nursing, School of Nursing, Wannan Medical College, 22 Wenchang West Road, Higher Education Park, Wuhu City, An Hui Province, P.R.China</p> <p>Wei, Huanhuan; Wannan Medical College, Obstetrics and Gynecology Nursing, School of Nursing, Wannan Medical College, 22 Wenchang West Road, Higher Education Park, Wuhu City, An Hui Province, P.R.China</p> <p>Li, Jing; Wannan Medical College, Department of Surgical Nursing, School of Nursing, Wannan Medical College, 22 Wenchang West Road, Higher Education Park, Wuhu City, An Hui Province, P.R.China</p> <p>Lei, Yunxiao; Wannan Medical College, Obstetrics and Gynecology Nursing, School of Nursing, Wannan Medical College, 22 Wenchang West Road, Higher Education Park, Wuhu City, An Hui Province, P.R.China;</p> <p>Henan University of Science and Technology, School of Nursing</p> <p>Sun, Lu; Wannan Medical College, Department of Emergency and Critical Care Nursing, School of Nursing, Wannan Medical College, 22 Wenchang West Road, Higher Education Park, Wuhu City, An Hui Province, P.R.China</p> <p>Li, Xiaoping; Wannan Medical College, Department of Emergency and Critical Care Nursing, School of Nursing, Wannan Medical College, 22 Wenchang West Road, Higher Education Park, Wuhu City, An Hui Province, P.R.China</p> <p>Hua, Ying; Wannan Medical College, Rehabilitation Nursing, School of Nursing, Wannan Medical College, 22 Wenchang West Road, Higher Education Park, Wuhu City, An Hui Province, P.R.China</p> <p>Che, Hengying; Yijishan Hospital of Wannan Medical College, Department</p> |



|                                    |                                                                                                                                                                                                                                                                                                                                                                                    |
|------------------------------------|------------------------------------------------------------------------------------------------------------------------------------------------------------------------------------------------------------------------------------------------------------------------------------------------------------------------------------------------------------------------------------|
|                                    | of nursing, Yijishan Hospital, the First Affiliated Hospital of Wannan Medical College, Zheshan West Road, Yijishan District, Wuhu City, Anhui Province<br>Li, Yuanzhen; Wannan Medical College, Department of Emergency and Critical Care Nursing, School of Nursing, Wannan Medical College, 22 Wenchang West Road, Higher Education Park, Wuhu City, An Hui Province, P.R.China |
| <b>Primary Subject Heading</b> :   | Geriatric medicine                                                                                                                                                                                                                                                                                                                                                                 |
| <b>Secondary Subject Heading</b> : | Public health                                                                                                                                                                                                                                                                                                                                                                      |
| <b>Keywords</b> :                  | Hypertension < CARDIOLOGY, Risk management < HEALTH SERVICES ADMINISTRATION & MANAGEMENT, Nutrition < TROPICAL MEDICINE                                                                                                                                                                                                                                                            |
|                                    |                                                                                                                                                                                                                                                                                                                                                                                    |

SCHOLARONE™  
Manuscripts



I, the Submitting Author has the right to grant and does grant on behalf of all authors of the Work (as defined in the below author licence), an exclusive licence and/or a non-exclusive licence for contributions from authors who are: i) UK Crown employees; ii) where BMJ has agreed a CC-BY licence shall apply, and/or iii) in accordance with the terms applicable for US Federal Government officers or employees acting as part of their official duties; on a worldwide, perpetual, irrevocable, royalty-free basis to BMJ Publishing Group Ltd ("BMJ") its licensees and where the relevant Journal is co-owned by BMJ to the co-owners of the Journal, to publish the Work in this journal and any other BMJ products and to exploit all rights, as set out in our [licence](#).

The Submitting Author accepts and understands that any supply made under these terms is made by BMJ to the Submitting Author unless you are acting as an employee on behalf of your employer or a postgraduate student of an affiliated institution which is paying any applicable article publishing charge ("APC") for Open Access articles. Where the Submitting Author wishes to make the Work available on an Open Access basis (and intends to pay the relevant APC), the terms of reuse of such Open Access shall be governed by a Creative Commons licence – details of these licences and which [Creative Commons](#) licence will apply to this Work are set out in our licence referred to above.

Other than as permitted in any relevant BMJ Author's Self Archiving Policies, I confirm this Work has not been accepted for publication elsewhere, is not being considered for publication elsewhere and does not duplicate material already published. I confirm all authors consent to publication of this Work and authorise the granting of this licence.

**Mediator or moderator? The role of obesity in the association between age at menarche and blood pressure in mid-aged and elderly Chinese: a population-based cross-sectional study**

Lin Zhang<sup>1</sup>, Liu Yang<sup>1</sup>, Congzhi Wang<sup>1</sup>, Ting Yuan<sup>2</sup>, Dongmei Zhang<sup>3</sup>, Huanhuan Wei<sup>2</sup>, Jing Li<sup>4</sup>, Yunxiao Lei<sup>2</sup>, Lu Sun<sup>5</sup>, Xiaoping Li<sup>5</sup>, Ying Hua<sup>6</sup>, Hengying Che<sup>7\*</sup>, Yuanzhen Li<sup>5</sup>

\*Correspondence: Hengying Che: 2722659079@qq.com

Lin Zhang: yaoran2008@163.com

Liu Yang: zqzqyl5858@163.com

Congzhi Wang: 289957420@qq.com

Ting Yuan: yuanting@wnmc.edu.cn

Dongmei Zhang: dongmei.0715@163.com

Huanhuan Wei: whh0702@163.com

Jing Li: 475366616@qq.com

Yunxiao Lei: lyxheart@163.com

Lu Sun: 565196200@qq.com

Xiaoping Li: 349274808@qq.com

Ying Hua: 1542997737@qq.com

Hengying Che: 2722659079@qq.com

Yuanzhen Li: yuanzhen.li@wnmc.edu.cn

<sup>1</sup> Department of Internal Medicine Nursing, School of Nursing, Wannan Medical College, 22 Wenchang West Road, Higher Education Park, Wuhu City, An Hui Province, P.R.China

<sup>2</sup> Obstetrics and Gynecology Nursing, School of Nursing, Wannan Medical College, 22 Wenchang West Road, Higher Education Park, Wuhu City, An Hui Province, P.R.China

<sup>3</sup> Department of Pediatric Nursing, School of Nursing, Wannan Medical College, 22 Wenchang West Road, Higher Education Park, Wuhu City, An Hui Province, P.R.China

<sup>4</sup> Department of Surgical Nursing, School of Nursing, Wannan Medical College, 22 Wenchang West Road, Higher Education Park, Wuhu City, An Hui Province, P.R.China

<sup>5</sup> Department of Emergency and Critical Care Nursing, School of Nursing, Wannan Medical College, 22 Wenchang West Road, Higher Education Park, Wuhu City, An Hui Province, P.R.China

<sup>6</sup> Rehabilitation Nursing, School of Nursing, Wannan Medical college, 22 Wenchang West Road, Higher Education Park, Wuhu City, An Hui Province, P.R.China

<sup>7</sup> Department of nursing, Yijishan Hospital, the First Affiliated Hospital of Wannan Medical College, Zheshan West Road, Yijishan District, Wuhu City, Anhui Province

## ABSTRACT

**Objective** We investigated the moderation/mediation between the age of menarche and obesity parameters in predicting blood pressure (BP) in middle-aged and elderly Chinese.

**Design** Our study is a population-based cross-sectional study.

**Setting** Participants in this study came from the China Health and Retirement Longitudinal Study (CHARLS).

**Participants** The analytic sample included 4513 participants aged 45 to 96 years.

**Main outcome measurements** Data were selected from the CHARLS, a cross-sectional study. Between-group differences were evaluated using chi-square, t-test and one-way ANOVA. The trend of related variables by characteristics was also tested using contrast analysis, as appropriate. Then, correlations between characteristics, moderator, mediator, independent, and dependent variables were used by Spearman's correlation test and Pearson's correlation test. Finally, the mediation analysis was performed by model 4 in process v3.3, and the moderation analysis was used model 1 to assess. All covariates were adjusted in the moderation or mediation models.

**Results** In correlation analysis, body mass index (BMI) and waist circle (WC) level were positively correlated with both systolic blood pressure (SBP) and diastolic blood pressure (DBP) in women (BMI and DBP:  $r=0.221$ ,  $P<0.001$ ; WC and DBP:  $r=0.183$ ,  $P<0.001$ ; BMI and SBP:  $r=0.129$ ,  $P<0.001$ ; WC and SBP:  $r=0.177$ ,  $P<0.001$ ). Age of menarche was negatively correlated with DBP ( $r=-0.060$ ,  $P<0.001$ ). However, the age of menarche was not significantly correlated with SBP ( $r=0.014$ ,  $P=0.335$ ). In the moderator analysis, after controlling for the potential confounders, the interaction term of obesity parameters\*age of menarche was not significant for predicting either DBP (BMI:  $B=0.0260$ ,  $SE=0.0229$ ,  $P=0.2556$ , 95% CI [-0.0189,0.071]); WC:  $B=0.0099$ ,  $SE=0.0074$ ,  $P=0.1833$ , 95% CI [-0.0047,0.0244]) or SBP (BMI:  $B=0.0091$ ,  $SE=0.0504$ ,  $P=0.8561$ , 95% CI [-0.0897,0.108]); WC:  $B=-0.0032$ ,  $SE=0.0159$ ,  $P=0.8427$ , 95% CI [-0.0343,0.028]). All correlations were significant correlation between age of menarche, obesity parameters and BP except the path of the menarche age  $\rightarrow$ SBP (with the addition of the BMI indicator:  $\beta=-0.0004$ ,  $B=-0.0046$ ,  $P=0.9797$ , 95% CI [-0.3619,0.3526]); with the addition of the WC indicator:  $\beta=0.0004$ ,  $B=0.0044$ ,  $P=0.9804$ , 95% CI [-0.3439, 0.3526]) in crude model. In general, after controlling for potential confounders. BMI (DBP:  $\beta=-0.0471$ ,  $B=-0.2682$ ,  $P=0.0021$ , 95% CI [-0.4388, -0.0976]; SBP:  $\beta=-0.0515$ ,  $B=-0.6314$ ,  $P<0.001$ , 95% CI [-0.9889, -0.2739]) and WC (DBP:  $\beta=-0.0474$ ,  $B=-0.2689$ ,  $P<0.001$ , 95% CI [-0.4395, -0.0984]; SBP:  $\beta=-0.0524$ ,  $B=-0.6320$ ,  $P<0.001$ , 95% CI [-0.9832, -0.2807]) partly

1 mediated the relationship between age of menarche and BP.  
2

3 **Conclusion** The interaction term of obesity parameters\*age of menarche was not significant for  
4 predicting either DBP or SBP in women. Moreover, obesity parameters partly mediated the  
5 relationship between the age of menarche and BP.  
6  
7

8 **Keywords** age at menarche, blood pressure, body mass index, moderator, mediator, obesity  
9 parameters, waist circle  
10  
11  
12  
13  
14

### 15 **Strengths and limitations of the study**

16 This is the first large population study to examine the moderation between the age of menarche  
17 and obesity parameters in predicting blood pressure (BP) in middle-aged and elderly Chinese, as well  
18 as the mediation effects of obesity parameters on the relationship between age of menarche and BP.  
19  
20  
21

22 This study included a large sample of 4513 middle-aged and older Chinese. The results presented  
23 in this article could be explored further in prospective cohort studies.  
24  
25

26 The main limitations of our research are related to the cross-sectional study and the self-reported  
27 method used for the assessment of age at menarche and most related confounders.  
28  
29

30 Blood pressure in our study was measured at home by professionally trained volunteers, and the  
31 next step is the use of clinical blood pressure and ambulatory blood pressure.  
32  
33  
34  
35  
36  
37  
38  
39  
40  
41  
42  
43  
44  
45  
46  
47  
48  
49  
50  
51  
52  
53  
54  
55  
56  
57  
58  
59  
60

## INTRODUCTION

Blood pressure (BP) is the force of circulating blood against the walls of the body's arteries, the major blood vessels in the body. Hypertension is diagnosed if BP readings are 140/90 mmHg or above on two different days. As a chronic disease[1], hypertension or elevated BP is a severe medical condition that significantly increases heart attack, stroke, blindness, kidney failure, and other complications. Hypertension risk factors[2-6] include stress, salt consumption, harmful use of alcohol, low intake of fruits and vegetables, saturated fat and trans fats, being overweight or obese, tobacco use, low diet in vitamin D, lack of physical activity, family history, aged 65 years or over and other co-existing diseases. The World Health Organization(WHO) said[7] an estimated 1.13 billion people worldwide have hypertension and most (two-thirds) living in low- and middle-income countries. It means that most people have high BP. Compared to the global average, people in low- and middle-income countries may bear a disproportionate and heavier burden of the disease, owing to several factors such as the ongoing nutritional transition in dietary consumption and energy expenditure, increasing trends in sedentary lifestyle, and other modifiable risk factors, and inadequate health care systems[8]. As a developing country, China has shown a relatively high and stable prevalence of hypertension among adults, especially in middle-aged and older people. Mahajan S, *et al.* [9] showed the prevalence of hypertension among middle-aged and elderly Chinese was approximately 41.81% in 2015. However, the rate control was still below 30%. Recently, hypertension control has become one of the critical public health interventions[10]. Therefore, it emphasizes the promotion of public health strategy to prevent the significant hypertension risk factors and assure the fullest available accessibility and use of quality health control for people with risk factors or who develop subclinical or overt hypertension. These actions are integral to a comprehensive public health strategy for hypertension promotion and prevention[11-13]. Though there is still much uncertainty about the etiology of hypertension, one of the strongest risk factors was overweight/obesity. Thus, increased body mass index (BMI) or centrally located body fat (especially waist circle [WC]) increases the risk of developing hypertension.

Several studies[14-18]have reported that early biological maturation has been associated with obesity and BP in adolescents. Werneck AO *et al.* [14] showed that behavioral and hereditary variables are more related to BP in late-maturing adolescents in adolescents. Widen E, *et al.*[15] found that earlier pubertal timing was associated with higher adult BMI and diastolic blood pressure (DBP) in both sexes. Mueller NT, *et al.* [16] showed that earlier menarche was associated with higher waist

1 circumference and BMI measured. Dreyfus J, *et al.*[17] found that earlier age at menarche was  
2 associated with higher mean BMI among African American and White women. Cao M, *et al.*[18]  
3 found that earlier age at menarche was associated with decreased DBP. However, it is not completely  
4 understood whether the changes in biological processes in the early years can affect cardiovascular  
5 outcomes across the life span. As important indicators of obesity, BMI/WC is directly associated with  
6 biological maturation (based on menarche age). Evidence from several studies[19-21] indicated that  
7 menarche was related to BMI in later life. Power C, *et al.*[19] found that timing of puberty was  
8 strongly associated with BMI for the earlier matures at ages 7-33 years. Adair LS, *et al.*[20] showed  
9 that overweight prevalence rates were significantly higher in early maturing adolescents. Must A, *et*  
10 *al.*[21] showed that early maturation in adult females overweight is mostly a result of the influence  
11 of elevated relative weight on early maturation. It has been speculated that the association between  
12 biological maturation and hypertension risk factors (based on menarche age) can be mediated or  
13 moderated by obesity parameters. Although speculative, the mediating or moderating role of obesity  
14 on the effect of early maturation (based on menarche age) on BP in adulthood has not been classified.  
15 However, this is especially important given that the onset of biological maturation, especially the age  
16 of menarche, now occurs at a much earlier age than in previous studies. Moreover, fully  
17 understanding the mediating effect of obesity on the association between early maturation (based on  
18 menarche age) and BP in adulthood could help identify women group that are at risk (based on obesity  
19 parameters) and those that should be put forward designed to place the many diverse conceptual  
20 and practice approaches and accomplishments in the early intervention. The moderating effect  
21 between early maturation (based on menarche age) and risk of hypertension (obesity parameters) on  
22 BP may also be fully considered.

23  
24  
25  
26  
27  
28  
29  
30  
31  
32  
33  
34  
35  
36  
37  
38  
39  
40  
41  
42  
43  
44 To date, few studies on the mediating and moderating analysis between early maturation (based on  
45 menarche age) and risk of hypertension (obesity parameters) were conducted in individuals aged  $\geq 45$   
46 years. Thus, this study aimed to determine their association with age of menarche, obesity parameters,  
47 and other confounding factors using the China Health and Retirement Longitudinal Study (CHARLS)  
48 from participants aged  $\geq 45$  years in China.

## 49 50 51 52 53 54 55 **METHODS**

### 56 57 **Study design and setting**

58 Data from CHARLS Wave 1 (2011) were used in our research. The CHARLS is an ongoing national  
59  
60



1 longitudinal study administered by the National School for Development (China Center for Economic  
2 Research)[22] from 2011. The study was approved by the institutional ethical committees of Peking  
3 University. All participants provided informed consent.  
4  
5  
6  
7

### 9 **Individuals**

10 At baseline[23], 6883 women were recruited for a longitudinal study, 2370 individuals were excluded  
11 (i.e., absence of metabolic measures, and/or absence of medication history, and/or having no blood  
12 pressure, and/or using antihypertension drugs). Finally, 4513 individuals were included in the  
13 analyses. Figure 1 summarized the selection of participants. Our study involved 4513 participants  
14 aged  $\geq 45$  years were total women [mean  $\pm$  standard deviation age =  $58.59 \pm 9.31$  years, ranged from  
15 45 to 96 years]. The mean and standard deviation of menarche age were  $16.27 \pm 2.18$  years (ranged  
16 from 10 to 30 years).  
17  
18  
19  
20  
21  
22  
23  
24  
25

### 26 **Self-report of risk factors**

27 We employed a general sociodemographic questionnaire that included the age, age of menarche  
28 ( $\leq 14$  years, 15 years, 16 years, 17 years, and  $\geq 18$  years), educational attainment (illiterate, less than  
29 elementary school, high school, and above vocational school), marital status (single and married),  
30 and region (rural and urban). The lifestyle questionnaire included smoking status (never smoker,  
31 previous smoker, and current smoker), alcohol consumption (never drinker, less than once a month  
32 and more than once a month), eating habits ( $\leq 2$  meals per day, 3 meals per day, and  $\geq 4$  meals per  
33 day), entertainment, the experience of a traumatic event (no and yes), and physical exercise habit (no,  
34 less than regular physical exercises, and regular physical exercises). History of cardiovascular  
35 diseases and liver disease, antihyperlipidemic drugs, and antidiabetic drugs were categorized in 'yes'  
36 or 'no'. Most variables were used in our previous studies[24-30].  
37  
38  
39  
40  
41  
42  
43  
44  
45  
46  
47  
48  
49

### 50 **Measurements**

51 Triglycerides (TG) level, low-density lipoprotein cholesterol (LDL-C), high-density lipoprotein  
52 cholesterol (HDL-C), and glycosylated hemoglobin (HbA1c) were analyzed by the enzymatic  
53 colorimetric tests, serum creatinine (Scr) and serum uric acid (SUA) level were analyzed using the  
54 urinalysis (UA) plus method. The average value of BP was measured by the mean of the 3-time  
55 measurements using Omron hem-7200 sphygmomanometer. Height was measured by the height  
56  
57  
58  
59  
60



1 measurement instrument. Participants were asked to stand barefoot on the base plate of the height  
2 meter in the upright position, with the back against the vertical backplate of the measuring instrument,  
3 with eyes open, arms alongside the body and heels were closed and the toes were separated by 60  
4 degrees. Anyone who appeared to be unable to complete measurement in time due to health reasons such  
5 as hunchback and inability to stand was excluded from our study. The method was used in our  
6 previous study[30]. BMI was calculated as body weight (kg) divided by the square of the subject's  
7 height (m). WC was measured midway between spina iliaca superior and the lower rib margin at the  
8 end of exhalation.

### 16 **Statistical analysis**

17 The data were presented as means(M) and standard deviation (SD) unless indicated otherwise. Mean  
18 and standard deviation were used to describe continuous variables (age, age of menarche, LDL-C,  
19 HDL-C, TG, HbA1c, Scr, SUA, BMI, WC, DBP, and SBP level), and number and percentage were  
20 used to assess the categorical variables (educational attainment, marital status, region, alcohol  
21 consumption, smoking status, eating habits, entertainment, the experience of a traumatic event,  
22 physical activity, history of CVDs, history of liver diseases, history of antilipidemic medication, anti-  
23 diabetic medication). Between-group differences according to the age of menarche ( $\leq 14$ years,  
24 15years, 16years, 17years,  $\geq 18$ years) were evaluated by the ANOVA (continuous data) or chi-square  
25 test (categorical data). Differences between two categories of characteristics (marital status, region,  
26 entertainment, the experience of a traumatic event, history of CVDs, history of antilipidemic  
27 medication, history of liver diseases, anti-diabetic medication) were also evaluated using t-test.  
28 However, the trend of related variables (LDL-C, HDL-C, LDL-C/HDL-C, TG, HbA1c, Scr, SUA,  
29 BMI, WC, DBP, and SBP level) by above three categories of characteristics (age of menarche levels,  
30 educational attainment, alcohol consumption, smoking status, eating habits, physical activity) was  
31 also tested using contrast analysis. Correlations between characteristics and BP were used by  
32 Spearman's correlation test. However, relationships between continuous variables (age, LDL-C,  
33 HDL-C, LDL-C/HDL-C, TG, HbA1c, Scr, SUA, BMI, WC and menarche age) and BP were used by  
34 Pearson's correlation test. The mediation analysis was performed by model 4 in process v3.3[31-33],  
35 and the moderation analysis was used model 1 to assess. All covariates (including age, educational  
36 attainment, marital status, region, smoking status, alcohol consumption, eating habits, entertainment,  
37 the experience of a traumatic event, physical activity, history of cardiovascular diseases, hepatitis  
38 history, antihyperlipidemic drugs, antidiabetic drugs, LDL-C, HDL-C, TG, HbA1c, Scr, SUA) were

1 adjusted for in the mediation or moderation models. Analyses including the unstandardized (B),  
2  
3 Standard Error (SE), or standardized coefficients ( $\beta$ ) with 95% confidence intervals(95%CI) were  
4  
5 calculated using the setting of modelling building in IBM SPSS22.0 software for Windows10 (IBM  
6  
7 Corp., Armonk, NY, USA) using the bootstrap method, with a 5% significance level.  
8  
9

### 10 **Patient and public involvement**

11  
12 No patients were involved in the development of the question, design or data interpretation.  
13  
14  
15  
16  
17  
18  
19  
20  
21  
22  
23  
24  
25  
26  
27  
28  
29  
30  
31  
32  
33  
34  
35  
36  
37  
38  
39  
40  
41  
42  
43  
44  
45  
46  
47  
48  
49  
50  
51  
52  
53  
54  
55  
56  
57  
58  
59  
60

For peer review only

## RESULTS

The final sample consisted of 4513 women with an average age of  $58.59 \pm 9.31$  years (ranged from 45 to 96 years). The mean and standard deviation of menarche age were  $16.27 \pm 2.18$  years (ranged from 10 to 30 years). The mean and standard deviation of DBP and SBP level were  $76.31 \pm 12.45$  mmHg (ranged from 39 to 136 mmHg), and  $131.65 \pm 26.73$  mmHg (ranged from 76 to 235 mmHg), respectively. The mean and standard deviation of BMI and WC level were  $24.04 \pm 4.13$  kg/m<sup>2</sup> (ranged from 11.65 to 63.05 kg/m<sup>2</sup>), and  $84.67 \pm 12.83$  cm (ranged from 19.5 to 130.10 cm), respectively. Table 1 showed the characteristics by the age of menarche. There were differences between the age of menarche in educational attainment, region, cigarette smoking, entertainment, and history of CVDs. However, between-group differences in the prevalence of marital status, alcohol consumption, eating habits, the experience of a traumatic event, physical activity, hepatitis history, antilipidemic medication history, and antidiabetic medication history were not found. Women with a higher age of menarche had higher HDL-C level and age but had lower TG, SUA, BMI, WC, and DBP level. Moreover, there were no differences in LDL-C, LDL-C/HDL-C, HbA1c, Scr, and SBP level between the age of menarche groups.

**Table 1 Characteristics by age at menarche (N=4513)**

| Variables                            | ≤14(years)<br>N=946 | 15(years)<br>N=671 | 16(years)<br>N=930 | 17(years)<br>N=702 | ≥18(years)<br>N=1264 | P                   |
|--------------------------------------|---------------------|--------------------|--------------------|--------------------|----------------------|---------------------|
| Age(years)                           | 56.88±9.38          | 57.49±9.34         | 58.41±9.42         | 58.6±9.12          | 60.57±8.91           | <0.001 <sup>a</sup> |
| Educational attainment               |                     |                    |                    |                    |                      |                     |
| Illiterate                           | 300(31.71)          | 233(34.72)         | 378(40.65)         | 314(44.73)         | 649(51.34)           | <0.001              |
| Less than elementary school          | 527(55.71)          | 383(57.08)         | 486(52.26)         | 343(48.86)         | 572(45.25)           |                     |
| High school                          | 82(8.67)            | 42(6.26)           | 48(5.16)           | 34(4.84)           | 34(2.69)             |                     |
| Above vocational school              | 37(3.91)            | 13(1.94)           | 18(1.94)           | 11(1.57)           | 9(0.71)              |                     |
| Marital status                       |                     |                    |                    |                    |                      |                     |
| Single                               | 137(14.48)          | 79(11.77)          | 137(14.73)         | 98(13.96)          | 207(16.38)           | 0.101               |
| Married                              | 809(85.52)          | 592(88.23)         | 793(85.27)         | 604(86.04)         | 1057(83.62)          |                     |
| Region                               |                     |                    |                    |                    |                      |                     |
| Rural                                | 519(54.86)          | 426(63.49)         | 577(62.04)         | 454(64.67)         | 885(70.02)           | <0.001              |
| Urban                                | 427(45.14)          | 245(36.51)         | 353(37.96)         | 248(35.33)         | 379(29.98)           |                     |
| Cigarette smoking                    |                     |                    |                    |                    |                      |                     |
| Never smoker                         | 883(93.34)          | 629(93.74)         | 846(90.97)         | 646(92.02)         | 1156(91.46)          | 0.017               |
| Previous smoker                      | 8(0.85)             | 11(1.64)           | 18(1.94)           | 13(1.85)           | 38(3.01)             |                     |
| Current smoker                       | 55(5.81)            | 31(4.62)           | 66(7.1)            | 43(6.13)           | 70(5.54)             |                     |
| Alcohol consumption                  |                     |                    |                    |                    |                      |                     |
| Never drinker                        | 827(87.42)          | 607(90.46)         | 809(86.99)         | 620(88.32)         | 1100(87.03)          | 0.520               |
| Less than once a month               | 45(4.76)            | 26(3.87)           | 48(5.16)           | 37(5.27)           | 65(5.14)             |                     |
| More than once a month               | 74(7.82)            | 38(5.66)           | 73(7.85)           | 45(6.41)           | 99(7.83)             |                     |
| Eating habits                        |                     |                    |                    |                    |                      |                     |
| ≤2 meals per day                     | 131(13.85)          | 99(14.75)          | 123(13.23)         | 82(11.68)          | 172(13.61)           | 0.706               |
| 3 meals per day                      | 804(84.99)          | 567(84.5)          | 794(85.38)         | 609(86.75)         | 1073(84.89)          |                     |
| ≥4 meals per day                     | 11(1.16)            | 5(0.75)            | 13(1.40)           | 11(1.57)           | 19(1.50)             |                     |
| Entertainment                        |                     |                    |                    |                    |                      |                     |
| No                                   | 417(44.08)          | 335(49.93)         | 470(50.54)         | 372(52.99)         | 655(51.82)           | 0.002               |
| Yes                                  | 529(55.92)          | 336(50.07)         | 460(49.46)         | 330(47.01)         | 609(48.18)           |                     |
| The experience of a traumatic event  |                     |                    |                    |                    |                      |                     |
| No                                   | 881(93.13)          | 630(93.89)         | 867(93.23)         | 652(92.88)         | 1169(92.48)          | 0.837               |
| Yes                                  | 65(6.87)            | 41(6.11)           | 63(6.77)           | 50(7.12)           | 95(7.52)             |                     |
| Physical activity                    |                     |                    |                    |                    |                      |                     |
| No physical exercise                 | 587(62.05)          | 393(58.57)         | 556(59.78)         | 428(60.97)         | 771(61.00)           | 0.260               |
| Less than regular physical exercises | 178(18.82)          | 137(20.42)         | 171(18.39)         | 136(19.37)         | 271(21.44)           |                     |
| Regular physical exercises           | 181(19.13)          | 141(21.01)         | 203(21.83)         | 138(19.66)         | 222(17.56)           |                     |
| History of CVDs                      |                     |                    |                    |                    |                      |                     |
| No                                   | 810(85.62)          | 590(87.93)         | 780(83.87)         | 605(86.18)         | 1115(88.21)          | 0.033               |
| Yes                                  | 136(14.38)          | 81(12.07)          | 150(16.13)         | 97(13.82)          | 149(11.79)           |                     |

|    |                                     |              |               |              |              |              |                     |
|----|-------------------------------------|--------------|---------------|--------------|--------------|--------------|---------------------|
| 1  | Hepatitis history                   |              |               |              |              |              |                     |
| 2  | No                                  | 910(96.19)   | 647(96.42)    | 885(95.16)   | 670(95.44)   | 1226(96.99)  | 0.205               |
| 3  | Yes                                 | 36(3.81)     | 24(3.58)      | 45(4.84)     | 32(4.56)     | 38(3.01)     |                     |
| 4  | History of antilipidemic medication |              |               |              |              |              |                     |
| 5  | No                                  | 884(93.45)   | 628(93.59)    | 884(95.05)   | 656(93.45)   | 1184(93.67)  | 0.566               |
| 6  | Yes                                 | 62(6.55)     | 43(6.41)      | 46(4.95)     | 46(6.55)     | 80(6.33)     |                     |
| 7  | History of antidiabetic medication  |              |               |              |              |              |                     |
| 8  | No                                  | 910(96.19)   | 645(96.13)    | 883(94.95)   | 663(94.44)   | 1213(95.97)  | 0.309               |
| 9  | Yes                                 | 36(3.81)     | 26(3.87)      | 47(5.05)     | 39(5.56)     | 51(4.03)     |                     |
| 10 | LDL-C (mg/dL)                       | 119.66±35.04 | 118.04±35.61  | 120.62±34.81 | 121.79±36.79 | 121.45±35.27 | 0.065 <sup>a</sup>  |
| 11 | HDL-C (mg/dL)                       | 50.57±14.17  | 51.31±14.01   | 50.84±14.43  | 51.05±14.18  | 53.2±14.87   | <0.001 <sup>a</sup> |
| 12 | LDL-C/HDL-C                         | 2.50±0.90    | 2.42±0.89     | 2.52±0.91    | 2.51±0.92    | 2.43±0.92    | 0.242 <sup>a</sup>  |
| 13 | TG (mg/dL)                          | 143.09±99.89 | 142.86±103.67 | 142.07±98.31 | 145.85±132.3 | 124.16±76.25 | <0.001 <sup>a</sup> |
| 14 | HbA1c (%)                           | 5.31±0.83    | 5.25±0.86     | 5.31±0.89    | 5.32±0.84    | 5.27±0.76    | 0.594 <sup>a</sup>  |
| 15 | Scr (mg/dL)                         | 0.69±0.14    | 0.69±0.14     | 0.70±0.18    | 0.68±0.13    | 0.69±0.15    | 0.813 <sup>a</sup>  |
| 16 | SUA (mg/dL)                         | 4.09±1.10    | 3.99±1.09     | 4.04±1.07    | 4.01±1.01    | 3.97±1.05    | 0.021 <sup>a</sup>  |
| 17 | BMI (kg/m <sup>2</sup> )            | 24.63±4.11   | 24.39±4.15    | 24.02±3.90   | 24.18±4.49   | 23.36±3.99   | <0.001 <sup>a</sup> |
| 18 | WC (cm)                             | 86.08±13.01  | 85.35±12.62   | 85.29±11.33  | 84.53±13.38  | 82.89±13.36  | <0.001 <sup>a</sup> |
| 19 | DBP (mmHg)                          | 77.07±12.07  | 77.28±12.53   | 77.01±12.51  | 76.31±12.80  | 74.72±25.82  | <0.001 <sup>a</sup> |
| 20 | SBP (mmHg)                          | 131.09±26.36 | 131.66±25.49  | 131.63±26.64 | 129.90±29.9  | 129.47±25.82 | 0.062 <sup>a</sup>  |

CVDs: cardiovascular diseases; LDL-C: low-density lipoprotein cholesterol; HDL-C: high-density lipoprotein cholesterol; TG: triglycerides; HbA1c: Hemoglobin A1C; Scr: serum creatinine; SUA: serum uric acid; BMI: body mass index; WC: waist circle; DBP: diastolic blood pressure; SBP: systolic blood pressure.

<sup>a</sup>P-value for trend

Characteristics, according to BMI and WC in women, were presented in Table 2. Firstly, women with the place in rural, more alcohol consumption, higher age of menarche had lower BMI and WC level; Secondly, women with a history of CVDs, antilipidemic medication, and antidiabetic medication had higher BMI and WC level than women without medical illness. Thirdly, women with higher educational attainment, being married, being never smoking, taking more eating meals, and taking entertainment had higher BMI level. At last, women with the experience of a traumatic event had lower WC level.

**Table 2 Characteristics of the participants with BMI and WC (N=4513)**

| Variables                            | BMI (cm)   | WC (cm)     | P-value for BMI     | P-value for WC      |
|--------------------------------------|------------|-------------|---------------------|---------------------|
| Educational attainment               |            |             |                     |                     |
| Illiterate                           | 23.57±4.19 | 84.35±12.95 | 0.001 <sup>a</sup>  | 0.971 <sup>a</sup>  |
| Less than elementary school          | 24.31±4.03 | 85.14±12.48 |                     |                     |
| High school                          | 24.93±4.07 | 83.17±14.65 |                     |                     |
| Above vocational school              | 24.85±4.43 | 83.40±13.99 |                     |                     |
| Marital status                       |            |             |                     |                     |
| Single                               | 23.21±4.18 | 84.93±12.04 | <0.001              | 0.582               |
| Married                              | 24.19±4.10 | 84.63±12.97 |                     |                     |
| Region                               |            |             |                     |                     |
| Rural                                | 23.64±3.96 | 83.95±12.42 | <0.001              | <0.001              |
| Urban                                | 24.75±4.32 | 85.94±13.43 |                     |                     |
| Cigarette smoking                    |            |             |                     |                     |
| Never smoker                         | 24.11±4.12 | 84.73±12.77 | <0.001 <sup>a</sup> | 0.135 <sup>a</sup>  |
| Previous smoker                      | 23.79±4.14 | 86.83±10.36 |                     |                     |
| Current smoker                       | 23.17±4.11 | 83.13±14.40 |                     |                     |
| Alcohol consumption                  |            |             |                     |                     |
| Never drinker                        | 24.10±4.14 | 85.02±12.5  | 0.011 <sup>a</sup>  | <0.001 <sup>a</sup> |
| Less than once a month               | 23.88±4.17 | 81.78±15.16 |                     |                     |
| More than once a month               | 23.51±3.94 | 82.49±14.62 |                     |                     |
| Eating habits                        |            |             |                     |                     |
| ≤2 meals per day                     | 23.27±3.89 | 84.12±10.42 | <0.001 <sup>a</sup> | 0.734 <sup>a</sup>  |
| 3 meals per day                      | 24.18±4.14 | 84.82±13.18 |                     |                     |
| ≥4 meals per day                     | 23.10±4.69 | 80.82±12.01 |                     |                     |
| Entertainment                        |            |             |                     |                     |
| No                                   | 23.64±4.09 | 84.34±12.08 | <0.001              | 0.085               |
| Yes                                  | 24.45±4.13 | 85.00±13.53 |                     |                     |
| The experience of a traumatic event  |            |             |                     |                     |
| No                                   | 24.06±4.14 | 84.82±12.57 | 0.474               | 0.004               |
| Yes                                  | 23.88±3.94 | 82.64±15.81 |                     |                     |
| Physical activity                    |            |             |                     |                     |
| No physical exercise                 | 24.05±4.29 | 84.79±12.74 | 0.400 <sup>a</sup>  | 0.701 <sup>a</sup>  |
| Less than regular physical exercises | 23.82±3.70 | 84.25±12.48 |                     |                     |
| Regular physical exercises           | 24.26±4.03 | 84.74±13.48 |                     |                     |

|    |                                     |             |             |                     |                     |
|----|-------------------------------------|-------------|-------------|---------------------|---------------------|
| 1  | History of CVDs                     |             |             |                     |                     |
| 2  | No                                  | 23.92±4.09  | 84.26±12.63 | <0.001              | <0.001              |
| 3  | Yes                                 | 24.83±4.28  | 87.25±13.89 |                     |                     |
| 4  | Hepatitis history                   |             |             |                     |                     |
| 5  | No                                  | 24.04±4.15  | 84.66±12.79 | 0.871               | 0.948               |
| 6  | Yes                                 | 24.09±3.47  | 84.73±14.37 |                     |                     |
| 7  | History of antilipidemic medication |             |             |                     |                     |
| 8  | No                                  | 23.87±3.99  | 84.22±12.72 | <0.001              | <0.001              |
| 9  | Yes                                 | 26.75±5.14  | 91.59±12.58 |                     |                     |
| 10 | History of antidiabetic medication  |             |             |                     |                     |
| 11 | No                                  | 23.95±4.01  | 84.42±12.81 | <0.001              | <0.001              |
| 12 | Yes                                 | 26.13±5.81  | 90.18±12.20 |                     |                     |
| 13 | Menarche age(years)                 |             |             |                     |                     |
| 14 | ≤14                                 | 24.63±4.11  | 86.08±13.01 | <0.001 <sup>a</sup> | <0.001 <sup>a</sup> |
| 15 | 15                                  | 24.39±4.15  | 85.35±12.62 |                     |                     |
| 16 | 16                                  | 24.02±3.90  | 85.29±11.33 |                     |                     |
| 17 | 17                                  | 24.18±4.49  | 84.53±13.38 |                     |                     |
| 18 | ≥18                                 | 23.36±13.36 | 82.89±13.36 |                     |                     |

CVDs: cardiovascular diseases; BMI: body mass index; WC: waist circle.

<sup>a</sup>P-value for trend

Characteristics, according to DBP and SBP in women, were presented in Table 3. Firstly, women with more alcohol consumption had lower DBP and SBP level; Secondly, women with a history of CVDs and antilipidemic medication had higher DBP and SBP level than women without medical illness. Thirdly, women with more eating meals, higher age of menarches had lower DBP level. At last, women with higher educational attainment, being married, and having regular physical exercises had lower SBP level, but women with antidiabetic medication had higher SBP level than women without medical illness.

**Table3 Table2 Characteristics of the participants with DBP and SBP (N=4513)**

| Variables                            | DBP(mmHg)   | SBP(mmHg)    | P-value for DBP     | P-value for SBP     |
|--------------------------------------|-------------|--------------|---------------------|---------------------|
| Educational attainment               |             |              |                     |                     |
| Illiterate                           | 76.37±12.45 | 133.93±28.43 | 0.288 <sup>a</sup>  | <0.001 <sup>a</sup> |
| Less than elementary school          | 76.38±12.42 | 128.89±24.99 |                     |                     |
| High school                          | 76.12±12.65 | 122.98±18.58 |                     |                     |
| Above vocational school              | 73.86±12.47 | 127.84±40.38 |                     |                     |
| Marital status                       |             |              |                     |                     |
| Single                               | 76.70±11.96 | 139.61±31.93 | 0.388               | <0.001              |
| Married                              | 76.25±12.53 | 129.12±25.42 |                     |                     |
| Region                               |             |              |                     |                     |
| Rural                                | 76.20±12.72 | 130.18±25.92 | 0.435               | 0.121               |
| Urban                                | 76.50±11.96 | 131.46±28.06 |                     |                     |
| Cigarette smoking                    |             |              |                     |                     |
| Never smoker                         | 76.32±12.45 | 130.43±26.97 | 0.673 <sup>a</sup>  | 0.051 <sup>a</sup>  |
| Previous smoker                      | 73.60±11.41 | 132.13±22.83 |                     |                     |
| Current smoker                       | 77.09±12.65 | 133.61±23.78 |                     |                     |
| Alcohol consumption                  |             |              |                     |                     |
| Never drinker                        | 76.53±12.38 | 131.27±27.27 | 0.003 <sup>a</sup>  | 0.001 <sup>a</sup>  |
| Less than once a month               | 74.76±12.18 | 123.81±19.94 |                     |                     |
| More than once a month               | 74.73±13.26 | 127.77±23.06 |                     |                     |
| Eating habits                        |             |              |                     |                     |
| ≤2 meals per day                     | 77.69±12.60 | 132.14±26.68 | <0.001 <sup>a</sup> | 0.117 <sup>a</sup>  |
| 3 meals per day                      | 76.17±12.41 | 130.44±26.37 |                     |                     |
| ≥4 meals per day                     | 71.56±11.46 | 128.63±44.41 |                     |                     |
| Entertainment                        |             |              |                     |                     |
| No                                   | 76.08±12.60 | 130.66±26.33 | 0.216               | 0.975               |
| Yes                                  | 76.54±12.30 | 130.64±27.12 |                     |                     |
| The experience of a traumatic event  |             |              |                     |                     |
| No                                   | 76.38±12.47 | 130.84±27.12 | 0.219               | 0.075               |
| Yes                                  | 75.48±12.14 | 128.05±20.66 |                     |                     |
| Physical activity                    |             |              |                     |                     |
| No physical exercise                 | 76.34±12.46 | 131.47±28.25 | 0.873 <sup>a</sup>  | 0.024 <sup>a</sup>  |
| Less than regular physical exercises | 76.05±12.76 | 129.23±22.14 |                     |                     |
| Regular physical exercises           | 76.50±12.08 | 129.54±26.03 |                     |                     |
| History of CVDs                      |             |              |                     |                     |
| No                                   | 76.11±12.44 | 130.02±26.29 | 0.021               | <0.001              |

|    |                                     |             |              |                     |                    |
|----|-------------------------------------|-------------|--------------|---------------------|--------------------|
| 1  | Yes                                 | 77.39±12.40 | 134.50±29.28 |                     |                    |
| 2  | Hepatitis history                   |             |              |                     |                    |
| 3  | No                                  | 76.36±12.45 | 130.76±26.50 | 0.017               | 0.144              |
| 4  | Yes                                 | 74.10±11.56 | 127.76±32.79 |                     |                    |
| 5  | History of antilipidemic medication |             |              |                     |                    |
| 6  | No                                  | 76.07±12.34 | 130.12±26.01 | <0.001              | <0.001             |
| 7  | Yes                                 | 80.09±13.46 | 138.80±35.01 |                     |                    |
| 8  | History of antidiabetic medication  |             |              |                     |                    |
| 9  | No                                  | 76.25±12.47 | 130.17±25.46 | 0.100               | <0.001             |
| 10 | Yes                                 | 77.73±11.83 | 140.96±45.17 |                     |                    |
| 11 | Menarche age(years)                 |             |              |                     |                    |
| 12 | ≤14                                 | 77.07±12.07 | 131.09±26.36 |                     |                    |
| 13 | 15                                  | 77.28±12.53 | 131.66±25.49 | <0.001 <sup>a</sup> | 0.062 <sup>a</sup> |
| 14 | 16                                  | 77.01±12.51 | 131.63±26.64 |                     |                    |
| 15 | 17                                  | 76.31±12.80 | 129.90±29.90 |                     |                    |
| 16 | ≥18                                 | 74.72±12.31 | 129.47±25.82 |                     |                    |

CVDs: cardiovascular diseases; DBP: diastolic blood pressure; SBP: systolic blood pressure.

<sup>a</sup>P-value for trend

Correlations between characteristics, independent, moderators, mediators and dependent variables, according to DBP and SBP, were presented in Table 4. Firstly, drinking, history of CVDs, antilipidemic medication, LDL-C, HDL-C, LDL-C/HDL-C, TG, HbA<sub>1c</sub>, Scr, SUA, BMI, and WC were significantly correlated with DBP and SBP in women; Secondly, eating habits, history of liver diseases, and menarche age were significantly correlated with DBP; At last, age, educational attainment, marital status, physical exercises, and antidiabetic medication were significantly correlated with SBP.

**Table4 Relationship between various characteristics and blood pressure status of participants (N=4513)**

| Variables                           | DBP<br>r(P)    | SBP<br>r(P)    |
|-------------------------------------|----------------|----------------|
| Age                                 | -0.016(0.275)  | 0.259(<0.001)  |
| Educational attainment              | -0.016(0.288)  | -0.106(<0.001) |
| Marital status                      | -0.013(0.388)  | -0.139(<0.001) |
| Current residence                   | 0.012(0.435)   | 0.023(0.121)   |
| Smoking status                      | 0.006(0.673)   | 0.029(0.051)   |
| Drinking                            | -0.045(0.003)  | -0.051(0.001)  |
| Eating habits                       | -0.055(<0.001) | -0.023(0.117)  |
| Entertainment                       | 0.018(0.216)   | 0.000(0.975)   |
| The experience of a traumatic event | -0.018(0.219)  | -0.027(0.075)  |
| Physical exercises                  | 0.002(0.873)   | -0.034(0.024)  |
| History of CVDs                     | 0.035(0.018)   | 0.058(<0.001)  |
| History of liver diseases           | -0.035(0.018)  | -0.022(0.146)  |
| Antilipidemic medication            | 0.078(<0.001)  | 0.078(<0.001)  |
| Antidiabetic medication             | 0.025(0.100)   | 0.083(<0.001)  |
| LDL-C                               | 0.050(0.001)   | 0.060(<0.001)  |
| HDL-C                               | -0.099(<0.001) | -0.062(<0.001) |
| LDL-C/HDL-C                         | 0.106(<0.001)  | 0.094(<0.001)  |
| TG                                  | 0.100(<0.001)  | 0.091(<0.001)  |
| HbA <sub>1c</sub>                   | 0.061(<0.001)  | 0.066(<0.001)  |
| Scr                                 | 0.056(<0.001)  | 0.076(<0.001)  |

|   |              |                |               |
|---|--------------|----------------|---------------|
| 1 | SUA          | 0.085(<0.001)  | 0.111(<0.001) |
| 2 | BMI          | 0.221(<0.001)  | 0.129(<0.001) |
| 3 | WC           | 0.183(<0.001)  | 0.177(<0.001) |
| 4 |              |                |               |
| 5 | Menarche age | -0.060(<0.001) | -0.014(0.335) |

6 CVDs: cardiovascular diseases; LDL-C: low-density lipoprotein cholesterol; HDL-C: high-density lipoprotein cholesterol; TG:  
 7 triglycerides; HbA1c: Hemoglobin A1C; Scr: serum creatinine; SUA: serum uric acid; BMI: body mass index; WC: waist circle; DBP:  
 8 diastolic blood pressure; SBP: systolic blood pressure.

9

10

11

12

13

14

15

16

17

18

19

20

21

22

23

24

25

26

27

28

29

30

31

32

33

34

35

36

37

38

39

40

41

42

43

44

45

46

47

48

49

50

51

52

53

54

55

56

57

58

59

60

In the moderator analysis, we tested the interaction between menarche age and obesity in predicting systolic and diastolic BP. The standard error, standardized coefficients and the adjusting associated 95% confidence intervals (CIs) are shown in Table 5. We controlled for socio-demographic characteristics, health behaviors, medical histories, and metabolic measures. After controlling for the total potential confounders, the moderating effect of obesity indicators on the relationship between age of menarche and BP was tested. The interaction term of obesity parameters\*age of menarche was not significant for predicting either DBP (BMI, adjusted  $P= 0.2556$ ; WC, adjusted  $P= 0.1833$ ) or SBP (BMI, adjusted  $P= 0.8561$ ; WC, adjusted  $P= 0.8427$ ) in women.

**Table 5 Moderator effect of obesity on the relationship between menarche age and BP in women (N=4513)**

| Dependent | Variables         | Model one <sup>a</sup> |                           |        | Model two <sup>b</sup> |                           |        | Model three <sup>c</sup> |                           |        | Model four <sup>d</sup> |                           |        | Model five <sup>e</sup> |                           |        |
|-----------|-------------------|------------------------|---------------------------|--------|------------------------|---------------------------|--------|--------------------------|---------------------------|--------|-------------------------|---------------------------|--------|-------------------------|---------------------------|--------|
|           |                   | SE                     | B (95%CI)                 | P      | se                     | B (95%CI)                 | P      | SE                       | B (95%CI)                 | P      | SE                      | B (95%CI)                 | P      | se                      | B (95%CI)                 | P      |
| DBP       | Menarche age      | 0.0835                 | -0.2027(-0.3665, -0.0390) | 0.0153 | 0.0855                 | -0.2528(-0.4203, -0.0852) | 0.0031 | 0.0853                   | -0.2411(-0.4084, -0.0738) | 0.0047 | 0.0854                  | -0.2485(-0.4158, -0.0811) | 0.0036 | 0.0973                  | -0.2162(-0.4069, -0.0254) | 0.0263 |
|           | BMI               | 0.0440                 | 0.6546(0.5684,0.7409)     | <0.001 | 0.0447                 | 0.6757(0.5881,0.7634)     | <0.001 | 0.0449                   | 0.6835(0.5955,0.7715)     | <0.001 | 0.0458                  | 0.6647(0.5750,0.7544)     | <0.001 | 0.0556                  | 0.5916(0.4827,0.7005)     | <0.001 |
|           | BMI× Menarche age | 0.0204                 | 0.0279(-0.0121,0.0678)    | 0.1719 | 0.0204                 | 0.0258(-0.0141,0.0658)    | 0.2046 | 0.0203                   | 0.0247(-0.0152,0.0645)    | 0.2248 | 0.0203                  | 0.0220(-0.0178,0.0618)    | 0.2790 | 0.0229                  | 0.0260(-0.0189,0.071)     | 0.2556 |
| SBP       | Menarche age      | 0.1826                 | -0.0003(-0.3583,0.3576)   | 0.9986 | 0.1789                 | -0.5822(-0.9329, -0.2315) | 0.0011 | 0.1788                   | -0.5682(-0.9187, -0.2177) | 0.0015 | 0.1795                  | -0.5944(-0.9462, -0.2425) | <0.001 | 0.2141                  | -0.5084(-0.9282, -0.0886) | 0.0176 |
|           | BMI               | 0.0964                 | 0.8361(0.6470,1.0251)     | <0.001 | 0.0938                 | 1.0927(0.9088,1.2766)     | <0.001 | 0.0942                   | 1.0906(0.9058,1.2753)     | <0.001 | 0.0965                  | 1.0287(0.8396,1.2178)     | <0.001 | 0.1223                  | 0.8846(0.6448,1.1244)     | <0.001 |
|           | BMI× Menarche age | 0.0446                 | 0.0178(-0.0696,0.1052)    | 0.6896 | 0.0426                 | 0.0111(-0.0726,0.0947)    | 0.7955 | 0.0426                   | 0.0113(-0.0722,0.0948)    | 0.7914 | 0.0427                  | 0.0052(-0.0786,0.0889)    | 0.9038 | 0.0504                  | 0.0091(-0.0897,0.108)     | 0.8561 |
| DBP       | Menarche age      | 0.0838                 | -0.2569(-0.4213, -0.0925) | 0.0022 | 0.0861                 | -0.2588(-0.4277, -0.0900) | 0.0027 | 0.0861                   | -0.2481(-0.4168, -0.0794) | 0.0040 | 0.0861                  | -0.2561(-0.4248, -0.0873) | 0.0029 | 0.0979                  | -0.2001(-0.3921, -0.0082) | 0.0410 |
|           | WC                | 0.0142                 | 0.1732(0.1452,0.2011)     | <0.001 | 0.0143                 | 0.1752(0.1471,0.2032)     | <0.001 | 0.0143                   | 0.1730(0.1449,0.2011)     | <0.001 | 0.0145                  | 0.1645(0.1361,0.193)      | <0.001 | 0.0172                  | 0.1472(0.1135,0.1809)     | <0.001 |
|           | WC× Menarche age  | 0.0065                 | 0.0058(-0.007,0.0186)     | 0.3758 | 0.0066                 | 0.0054(-0.0075,0.0182)    | 0.4136 | 0.0065                   | 0.005(-0.0079,0.0178)     | 0.4473 | 0.0065                  | 0.0043(-0.0085,0.0171)    | 0.5075 | 0.0074                  | 0.0099(-0.0047,0.0244)    | 0.1833 |
| SBP       | Menarche age      | 0.1777                 | -0.0009(-0.3492,0.3475)   | 0.9961 | 0.1761                 | -0.5656(-0.9107, -0.2204) | 0.0013 | 0.1760                   | -0.5546(-0.8997, -0.2094) | 0.0016 | 0.1766                  | -0.581(-0.9273, -0.2347)  | 0.0010 | 0.2096                  | -0.4548(-0.8658, -0.0438) | 0.0301 |
|           | WC                | 0.0302                 | 0.3637(0.3044,0.4229)     | <0.001 | 0.0293                 | 0.3228(0.2654,0.3802)     | <0.001 | 0.0294                   | 0.3153(0.2578,0.3729)     | <0.001 | 0.0298                  | 0.2944(0.236,0.3528)      | <0.001 | 0.0368                  | 0.2744(0.2022,0.3466)     | <0.001 |
|           | WC× Menarche age  | 0.0139                 | -0.0156(-0.0428,0.0116)   | 0.2607 | 0.0134                 | -0.0061(-0.0323,0.0202)   | 0.6501 | 0.0134                   | -0.0063(-0.0326,0.0199)   | 0.6367 | 0.0134                  | -0.0081(-0.0344,0.0182)   | 0.5443 | 0.0159                  | -0.0032(-0.0343,0.028)    | 0.8427 |

CVDs: cardiovascular diseases; LDL-C: low-density lipoprotein cholesterol; HDL-C: high-density lipoprotein cholesterol; TG: triglycerides; HbA1c: Hemoglobin A1c; Scr: serum creatinine; SUA: serum uric acid; BMI: body mass index; WC: waist circle; DBP: diastolic blood pressure; SBP: systolic blood pressure; Un-standardized: B; Standard Error: SE.

<sup>a</sup> Unadjusted;

<sup>b</sup> Adjusted for age, educational attainment, marital status, region;

<sup>c</sup> Adjusted for age, educational attainment, marital status, region, smoking status, alcohol consumption, eating habits, entertainment, experience of a traumatic event, physical activity;

<sup>d</sup> Adjusted for age, educational attainment, marital status, region, smoking status, alcohol consumption, eating habits, entertainment, experience of a traumatic event, physical activity, history of CVDs, hepatitis history, antihyperlipidemic drugs, antidiabetic drugs;

<sup>e</sup> Adjusted for age, educational attainment, marital status, region, smoking status, alcohol consumption, eating habits, entertainment, experience of a traumatic event, physical activity, history of CVDs, hepatitis history, antihyperlipidemic drugs, antidiabetic drugs, LDL-C, HDL-C, TG, HbA1c, Scr, SUA.



1 In the mediation analysis, we estimated the BP equation using bootstrap inference for model  
2 coefficients. The un-standardized, standardized coefficients and the adjusting associated 95%  
3 confidence intervals (CIs) are shown in Table 6. We controlled for socio-demographic characteristics,  
4 health behaviors, medical histories, and metabolic measures. After controlling for the total potential  
5 confounders, the mediating effect of obesity indicators on the relationship between age of menarche  
6 and BP was tested. All correlations were significant correlation between age of menarche, obesity  
7 parameters and BP except the path of the age of menarche→SBP (BMI, crude  $P=0.9797$ ; WC, crude  
8  $P=0.9804$ ) in model one. In general, after controlling for potential confounders. BMI (DBP: adjusted  
9  $P=0.0021$ , SBP: adjusted  $P<0.001$ ) and WC (DBP: adjusted  $P=0.0020$ , SBP: adjusted  $P<0.001$ )  
10 partly mediated the relationship between the age of menarche and BP.  
11  
12  
13  
14  
15  
16  
17  
18  
19  
20  
21  
22  
23  
24  
25  
26  
27  
28  
29  
30  
31  
32  
33  
34  
35  
36  
37  
38  
39  
40  
41  
42  
43  
44  
45  
46  
47  
48  
49  
50  
51  
52  
53  
54  
55  
56  
57  
58  
59  
60

**Table 6 Mediation effect of obesity on the relationship between age at menarche and BP in women (N=4513)**

| Path  |                  | Model one <sup>a</sup> |                           |        | Model two <sup>b</sup> |                           |        | Model three <sup>c</sup> |                           |        | Model four <sup>d</sup> |                           |        | Model five <sup>e</sup> |                           |        |
|-------|------------------|------------------------|---------------------------|--------|------------------------|---------------------------|--------|--------------------------|---------------------------|--------|-------------------------|---------------------------|--------|-------------------------|---------------------------|--------|
|       |                  | $\beta$                | B (95%CI)                 | P      | $\beta$                | B (95%CI)                 | P      | $\beta$                  | B (95%CI)                 | P      | $\beta$                 | B (95%CI)                 | P      | $\beta$                 | B (95%CI)                 | P      |
| Path1 | Menarche age→BMI | -0.1080                | -0.2045(-0.2595, -0.1496) | <0.001 | -0.0725                | -0.1374(-0.1930, -0.0818) | <0.001 | -0.0707                  | -0.1339(-0.1892, -0.0786) | <0.001 | -0.0705                 | -0.1334(-0.1880, -0.0788) | <0.001 | -0.0468                 | -0.0885(-0.1409, -0.0361) | <0.001 |
|       | Menarche age→DBP | -0.0367                | -0.2096(-0.3731, -0.0461) | 0.0120 | -0.0454                | -0.2596(-0.4268, -0.0924) | 0.0024 | -0.0433                  | -0.2475(-0.4145, -0.0806) | 0.0037 | -0.0447                 | -0.2542(-0.4213, -0.0872) | 0.0029 | -0.0379                 | -0.2154(-0.3833, -0.0474) | 0.0120 |
|       | BMI→DBP          | 0.2171                 | 0.6545(0.5682, 0.7408)    | <0.001 | 0.2241                 | 0.6757(0.5881, 0.7634)    | <0.001 | 0.2276                   | 0.6835(0.5955, 0.7715)    | <0.001 | 0.2208                  | 0.6643(0.5746, 0.7541)    | <0.001 | 0.1986                  | 0.5973(0.5026, 0.6921)    | <0.001 |
|       | Total effect     | -0.0601                | -0.3435(-0.5099, -0.177)  | <0.001 | -0.0617                | -0.3524(-0.5234, -0.1815) | <0.001 | -0.0593                  | -0.3390(-0.5098, -0.1683) | <0.001 | -0.0602                 | -0.3429(-0.5133, -0.1724) | <0.001 | -0.0471                 | -0.2682(-0.4388, -0.0976) | 0.0021 |
| Path2 | Menarche age→BMI | 0.1085                 | -0.2051(-0.2601, -0.1502) | <0.001 | -0.0731                | -0.1381(-0.1936, -0.0826) | <0.001 | -0.0712                  | -0.1346(-0.1898, -0.0793) | <0.001 | -0.0711                 | -0.1342(-0.1887, -0.0797) | <0.001 | -0.0473                 | -0.0892(-0.1416, -0.0369) | <0.001 |
|       | Menarche age→SBP | -0.0004                | -0.0046(-0.3619, 0.3526)  | 0.9797 | -0.0477                | -0.585(-0.9350, -0.2351)  | 0.0011 | -0.0466                  | -0.5711(-0.9209, -0.2213) | 0.0014 | -0.0486                 | -0.5957(-0.9468, -0.2446) | <0.001 | -0.0446                 | -0.5479(-0.9025, -0.1932) | 0.0025 |
|       | BMI→SBP          | 0.1289                 | 0.8359(0.6469, 1.0249)    | <0.001 | 0.1685                 | 1.0927(0.9088, 1.2766)    | <0.001 | 0.1682                   | 1.0905(0.9058, 1.2753)    | <0.001 | 0.1585                  | 1.0286(0.8395, 1.2176)    | <0.001 | 0.1441                  | 0.9366(0.7361, 1.1371)    | <0.001 |
|       | Total effect     | -0.0144                | -0.1761(-0.5342, 0.182)   | 0.3350 | -0.0601                | -0.736(-1.0902, -0.3817)  | <0.001 | -0.0586                  | -0.7178(-1.0719, -0.3638) | <0.001 | -0.0599                 | -0.7337(-1.0883, -0.3791) | <0.001 | -0.0515                 | -0.6314(-0.9889, -0.2739) | <0.001 |
| Path3 | Menarche age→WC  | -0.0837                | -0.4928(-0.6642, -0.3213) | <0.001 | -0.0910                | -0.5355(-0.7107, -0.3602) | <0.001 | -0.0896                  | -0.5275(-0.7024, -0.3526) | <0.001 | -0.0898                 | -0.5285(-0.7026, -0.3545) | <0.001 | -0.0696                 | -0.4085(-0.5778, -0.2392) | <0.001 |
|       | Menarche age→DBP | -0.0454                | -0.2589(-0.4232, -0.0945) | 0.0020 | -0.0456                | -0.26(-0.4288, -0.0912)   | 0.0025 | -0.0437                  | -0.2491(-0.4178, -0.0805) | 0.0038 | -0.0452                 | -0.2571(-0.4257, -0.0884) | 0.0028 | -0.0373                 | -0.2118(-0.3811, -0.0424) | 0.0143 |
|       | WC→DBP           | 0.1789                 | 0.1733(0.1454, 0.2013)    | <0.001 | -0.1810                | 0.1754(0.1473, 0.2034)    | <0.001 | 0.1787                   | 0.1732(0.1451, 0.2013)    | <0.001 | 0.1705                  | 0.1647(0.1363, 0.1931)    | <0.001 | 0.1445                  | 0.1399(0.1104, 0.1695)    | <0.001 |
|       | Total effect     | -0.0604                | -0.3443(-0.5107, -0.1779) | <0.001 | -0.0620                | -0.3539(-0.5248, -0.183)  | <0.001 | -0.0597                  | -0.3405(-0.5112, -0.1698) | <0.001 | -0.0606                 | -0.3441(-0.5145, -0.1737) | <0.001 | -0.0474                 | -0.2689(-0.4395, -0.0984) | 0.0020 |
| Path4 | Menarche age→WC  | -0.0849                | -0.4944(-0.6658, -0.323)  | <0.001 | -0.0914                | -0.5376(-0.7129, -0.3624) | <0.001 | -0.0901                  | -0.5299(-0.7048, -0.355)  | <0.001 | -0.0904                 | -0.531(-0.7051, -0.357)   | <0.001 | -0.0702                 | -0.4111(-0.5803, -0.2417) | <0.001 |
|       | Menarche age→SBP | 0.0004                 | 0.0044(-0.3439, 0.3526)   | 0.9804 | -0.0468                | -0.5643(-0.9094, -0.2192) | 0.0014 | -0.0459                  | -0.5533(-0.8983, -0.2082) | 0.0017 | -0.0481                 | -0.5792(-0.9255, -0.233)  | 0.0010 | -0.0433                 | -0.5228(-0.8721, -0.1735) | 0.0034 |
|       | WC→SBP           | 0.1772                 | 0.3632(0.3040, 0.4224)    | <0.001 | 0.1574                 | 0.3226(0.2652, 0.38)      | <0.001 | 0.1538                   | 0.3151(0.2576, 0.3727)    | <0.001 | 0.1436                  | 0.2942(0.2358, 0.3526)    | <0.001 | 0.1290                  | 0.2655(0.2045, 0.3266)    | <0.001 |
|       | Total effect     | -0.0145                | -0.1752(-0.5277, 0.1773)  | 0.3300 | -0.0612                | -0.7377(-1.086, -0.3894)  | <0.001 | -0.0598                  | -0.7202(-1.0683, -0.3722) | <0.001 | -0.0611                 | -0.7354(-1.084, -0.3869)  | <0.001 | -0.0524                 | -0.6320(-0.9832, -0.2807) | <0.001 |

CVDs: cardiovascular diseases; LDL-C: low-density lipoprotein cholesterol; HDL-C: high-density lipoprotein cholesterol; TG: triglycerides; HbA1c: Hemoglobin A1C; Scr: serum creatinine; SUA: serum uric acid; BMI: body mass index; WC: waist circle; DBP: diastolic blood pressure; SBP: systolic blood pressure; Un-standardized: B, standardized coefficients,  $\beta$ .  
**Path1:** Mediation effect of BMI on the relationship between age at menarche and DBP.  
**Path2:** Mediation effect of BMI on the relationship between age at menarche and SBP.  
**Path3:** Mediation effect of WC on the relationship between age at menarche and DBP.  
**Path4:** Mediation effect of WC on the relationship between age at menarche and SBP.

<sup>a</sup> Unadjusted;  
<sup>b</sup> Adjusted for age, educational attainment, marital status, region;  
<sup>c</sup> Adjusted for age, educational attainment, marital status, region, cigarette smoking, alcohol consumption, eating habits, entertainment, the experience of a traumatic event, physical activity;  
<sup>d</sup> Adjusted for age, educational attainment, marital status, region, cigarette smoking, alcohol consumption, eating habits, entertainment, the experience of a traumatic event, physical activity, history of CVDs, hepatitis history, history of antilipidemic medication, history of antidiabetic medication;  
<sup>e</sup> Adjusted for age, educational attainment, marital status, region, cigarette smoking, alcohol consumption, eating habits, entertainment, the experience of a traumatic event, physical activity, history of CVDs, hepatitis history, history of antilipidemic medication, history of antidiabetic medication, LDL-C, HDL-C, TG, HbA1c, Scr, SUA.

## DISCUSSION

In the study, we attempted to explore the association between age of menarche and BP and examined the moderating and mediating effect of obesity parameters (BMI and WC) on the association. We have found that the interaction term of obesity parameters\*age of menarche was not significant for predicting BP. It was also important to note that WC and BMI partly mediated the association between age of menarche and BP. The results of our study were partly constant with most previous studies. And so previous studies had only focused on the relationship between earlier biological maturation and health outcomes in late adolescence and adulthood. Most of the previous studies meant exactly that: earlier biological maturation was at a higher risk for health outcomes in late adolescence and adulthood. Furthermore, most previous studies found that early biological maturation (age of menarche) or puberty was significantly related to obesity parameters[34-38], hypertension[38-41], and metabolic syndrome[42-50]. In general, our results were mostly consistent with the results of previous studies that suggest that earlier biological maturation is a risk factor for several negative health outcomes in late adolescence and adulthood.

Our study suggested the likelihood of a dose-response relationship between age of menarche and obesity parameters (BMI and WC). The relationship could be identified by the fact that early-maturing girls already have more adiposity before menarche, given that fatty tissue, through leptin release, has a crucial role in the initiation of the biological maturation process[51 52]. Early maturing girls could maintain their higher fatty tissue in adulthood[53]. Another mechanism may also be associated with the time of the maturation process. It has been reported that early maturing girls could experience a more accelerated maturation process than late maturing ones. Thus, more significant interference with biological maturation in girls can lead to increased more fatty tissue[54]. We also found a significantly negative relationship between age at menarche and BP in mid-aged and elderly Chinese women. However, this association did not exist between the age of menarche and SBP before adjusting the related confounders. This result is consistent with previous findings[55-63] regarding the age of menarche as a cardiovascular risk factor. The weak association between age at menarche and BP in adulthood could, in part, be explained by the fact that early matures were younger than women with late menarche. This result could be an expression of the fact that BP is an outcome with a higher latency period than obesity. Moreover, among women who already entered menopause in our study, the effects of menarche could be even weaker, as results suggest, and obesity could have more effect on BP. We also found that women with a higher age of menarche had higher HDL-C

1 level but had lower DBP level. The results of the current study were quite consistent with those of  
2  
3 [22] Feng Y, *et al.* Increased body fat, especially abdominal fat, partially explained the increased  
4  
5 insulin resistance and dyslipidemia in women with early menarche age. Therefore, obesity in  
6  
7 adolescence, sociodemographic, or even behavioral factors through life (including age, educational  
8  
9 attainment, marital status, region, smoking status, alcohol consumption, eating habits, entertainment,  
10  
11 the experience of a traumatic event, physical activity) were potential mediators to target when  
12  
13 interventions for BP control and management.

14  
15 Though so many studies have explored the association analysis between the age of menarche or  
16  
17 obesity parameters and BP, there were only two studies[64 65] that explored the mediating effect of  
18  
19 obesity parameters on the relation between age of menarche and BP. Zhang L, *et al.* [64] found that  
20  
21 the relationship between age of menarche and DBP was partly mediated by WC. In contrast, the  
22  
23 relationship between age of menarche and SBP was fully mediated by WC in women. Werneck AO,  
24  
25 *et al.* [65] showed that women with late menarche are less likely to have a risk of hypertension, and  
26  
27 BMI was an important mediator of the age at the menarche-hypertension association.  
28  
29 Interestingly, we found that obesity parameters partly mediated the relationship between the age of  
30  
31 menarche and BP in women. The difference between our research and others may due to the different  
32  
33 populations, different definitions of early and later menarche, and different confounding  
34  
35 variables by controlling. The individuals in our study were mid-aged and elderly Chinese women,  
36  
37 where the mean age at recruitment and age of menarche were older than in the Werneck AO, *et al.*'s  
38  
39 study[65], and the level of socio-economic development also made some contribution to  
40  
41 ontogenetic development. In addition, other studies and a meta-analysis[55 57 63 66-68] reported an  
42  
43 inverse association between early age of menarche and hypertension, which was not observed in  
44  
45 Zhang L, *et al.*' study[64]. They found no direct relationship between the age of menarche and DBP,  
46  
47 and we have found a direct relationship between the age of menarche and DBP. The participants were  
48  
49 similar in China and its socio-economic background, this phenomenon could be explained by the  
50  
51 cumulative effect, which showed a significantly negative association between age of menarche and  
52  
53 DBP over life-span.

54  
55 There were several limitations to the study. The main limitations of our research are related to the  
56  
57 cross-sectional study and the self-reported method used for the assessment of age at menarche and  
58  
59 most related confounders. BP in our study was measured at home by professionally trained volunteers,  
60  
and the next step is the use of clinical BP and ambulatory blood pressure. However, this is the first

1 large population study to examine the moderation between the age of menarche and obesity  
2 parameters in predicting BP in middle-aged and elderly Chinese, as well as the mediation effects of  
3 obesity parameters on the relationship between age of menarche and BP. Moreover, a significant  
4 strength of the study is a large sample of 4513 middle-aged and older Chinese. The results presented  
5 in this article represent the baseline data that could be explored further in prospective cohort studies.  
6  
7  
8  
9

10  
11 In sum, the interaction term of obesity parameters\*age of menarche was not significant for  
12 predicting either DBP or SBP in women. Moreover, obesity parameters partly mediated the  
13 relationship between the age of menarche and BP.  
14  
15  
16  
17

## 18 **CONCLUSIONS**

19  
20 The interaction term of obesity parameters\*age of menarche was not significant for predicting either  
21 DBP or SBP in women. Moreover, Obesity parameters partly mediated the relationship between age  
22 of menarche and BP.  
23  
24  
25  
26

## 27 **Author affiliations**

28  
29 <sup>1</sup> Department of Internal Medicine Nursing, School of Nursing, Wannan Medical College, 22  
30 Wenchang West Road, Higher Education Park, Wuhu City, An Hui Province, P.R.China

31  
32 <sup>2</sup> Obstetrics and Gynecology Nursing, School of Nursing, Wannan Medical College, 22 Wenchang  
33 West Road, Higher Education Park, Wuhu City, An Hui Province, P.R.China

34  
35 <sup>3</sup>Department of Pediatric Nursing, School of Nursing, Wannan Medical College, 22 Wenchang West  
36 Road, Higher Education Park, Wuhu City, An Hui Province, P.R.China

37  
38 <sup>4</sup>Department of Surgical Nursing, School of Nursing, Wannan Medical College, 22 Wenchang West  
39 Road, Higher Education Park, Wuhu City, An Hui Province, P.R.China

40  
41 <sup>5</sup>Department of Emergency and Critical Care Nursing, School of Nursing, Wannan Medical College,  
42 22 Wenchang West Road, Higher Education Park, Wuhu City, An Hui Province, P.R.China

43  
44 <sup>6</sup>Rehabilitation Nursing, School of Nursing, Wanna Medical college, 22 Wenchang West Road,  
45 Higher Education Park, Wuhu City, An Hui Province, P.R.China

46  
47 <sup>7</sup>Department of nursing, Yijishan Hospital, the First Affiliated Hospital of Wannan Medical College,  
48 Zheshan West Road, Yijishan District, Wuhu City, Anhui Province  
49  
50  
51  
52  
53  
54  
55

## 56 **Abbreviations**

57  
58 BMI, body mass index; BP, blood pressure; Confidence intervals, CIs; CDC, Centers for Disease  
59 Control and Prevention; CHARLS, China Health and Retirement Longitudinal Study; CVDs,  
60

1 cardiovascular diseases; DBP, diastolic blood pressure; HDL, high-density lipoprotein; Hemoglobin  
2 A1C, HbA1c; LDL, low-density lipoprotein; M, mean; NSFC, The National Natural Science  
3 Foundation of China; National Institute on Aging, NIA; SBP, systolic blood pressure; SUA, serum  
4 uric acid; standard error, SE; unstandardized, B; standardized coefficients,  $\beta$ ; Scr, serum creatinine;  
5 SD, standard deviation; TG, triglycerides; urinalysis, UA; World Bank, WB; waist circle, WC; World  
6 Health Organization, WHO.  
7  
8  
9  
10  
11

### 12 **Acknowledgements**

13 We are grateful to the China Center for Economic Research, and we also thank all participants for  
14 their contribution and members of the research for collecting the data.  
15  
16  
17

### 18 **Author contributions**

19 Conceived and designed the research: LZ. Wrote the paper: LZ. Analyzed the data: LZ. Revised the  
20 paper: LZ, L Y, C-z W, TY, Dm Z, H-h W, JL, Y-x L, LS, X-p L, YH, H-y C, and Y-z L.  
21  
22  
23

### 24 **Funding**

25 CHARLS was supported by the NSFC (70910107022, 71130002) and National Institute on Aging  
26 (R03-TW008358-01; R01-AG037031-03S1), and World Bank (7159234) and the publication fee was  
27 supported by the Support Program for Outstanding Young Talents from the Universities and Colleges  
28 of Anhui Province for Lin Zhang(gxyqZD2021118).  
29  
30  
31  
32  
33

### 34 **Disclosure**

35 The authors declare that there is no potential conflict of interest relevant to the research.  
36  
37

### 38 **Patient consent**

39 Completion of all authors declaration and consent to publish form is required.  
40  
41

### 42 **Ethics approval and consent to participate**

43 Ethics approval for the research was granted by the Ethics Review Committee of Peking University,  
44 and all participants provided informed consent. Approval for this study was given by the medical  
45 ethics committee of Wannan medical college (approval number 2021–3).  
46  
47  
48

### 49 **Data sharing**

50 Data sharing statement Extra data can be accessed via [http://charls.pku.edu.cn/pages/data/111/zh-](http://charls.pku.edu.cn/pages/data/111/zh-cn.html)  
51 [cn.html](http://charls.pku.edu.cn/pages/data/111/zh-cn.html).  
52  
53  
54  
55  
56  
57  
58  
59  
60

## References

1. Tian S, Xu Y, Dong H. The effect of metabolic health and obesity phenotypes on risk of hypertension: A nationwide population-based study using 5 representative definitions of metabolic health. *Medicine (Baltimore)* 2018;**97**(38):e12425 doi: 10.1097/MD.00000000000012425[published Online First: Epub Date]].
2. Abdulsalam S, Olugbenga-Bello A, Olarewaju O, et al. Sociodemographic correlates of modifiable risk factors for hypertension in a rural local government area of oyo state South west Nigeria. *Int J Hypertens* 2014;**2014**:842028 doi: 10.1155/2014/842028[published Online First: Epub Date]].
3. Ke L, Ho J, Feng J, et al. Modifiable risk factors including sunlight exposure and fish consumption are associated with risk of hypertension in a large representative population from Macau. *J Steroid Biochem Mol Biol* 2014;**144 Pt A**:152-5 doi: 10.1016/j.jsbmb.2013.10.019[published Online First: Epub Date]].
4. Ibekwe R. Modifiable Risk factors of Hypertension and Socio-demographic Profile in Oghara, Delta State; Prevalence and Correlates. *Ann Med Health Sci Res* 2015;**5**(1):71-7 doi: 10.4103/2141-9248.149793[published Online First: Epub Date]].
5. Pilakkadavath Z, Shaffi M. Modifiable risk factors of hypertension: A hospital-based case-control study from Kerala, India. *J Family Med Prim Care* 2016;**5**(1):114-9 doi: 10.4103/2249-4863.184634[published Online First: Epub Date]].
6. Mamudu HM, Paul TK, Wang L, et al. Association Between Multiple Modifiable Risk Factors of Cardiovascular Disease and Hypertension among Asymptomatic Patients in Central Appalachia. *South Med J* 2017;**110**(2):90-96 doi: 10.14423/SMJ.0000000000000602[published Online First: Epub Date]].
7. Collaboration NCDRF. Worldwide trends in blood pressure from 1975 to 2015: a pooled analysis of 1479 population-based measurement studies with 19.1 million participants. *Lancet* 2017;**389**(10064):37-55 doi: 10.1016/S0140-6736(16)31919-5[published Online First: Epub Date]].
8. Bromfield S, Muntner P. High blood pressure: the leading global burden of disease risk factor and the need for worldwide prevention programs. *Curr Hypertens Rep* 2013;**15**(3):134-6 doi: 10.1007/s11906-013-0340-9[published Online First: Epub Date]].
9. Mahajan S, Zhang D, He S, et al. Prevalence, Awareness, and Treatment of Isolated Diastolic Hypertension: Insights From the China PEACE Million Persons Project. *J Am Heart Assoc* 2019;**8**(19):e012954 doi: 10.1161/JAHA.119.012954[published Online First: Epub Date]].
10. Cloutier L, Morris D, Bruneau J, et al. World Health Organization celebrates World Health Day, April 7,2013--focusing on hypertension. *Canadian journal of cardiovascular nursing = Journal canadien en soins infirmiers cardio-vasculaires* 2013;**23**(2):9-11
11. Webb MS. Stress management strategies in hypertension control. *Ethnicity & disease* 2002;**12**(4):S3-95-100
12. Kotchen TA. The search for strategies to control hypertension. *Circulation* 2010;**122**(12):1141-3 doi: 10.1161/CIRCULATIONAHA.110.978759[published Online First: Epub Date]].
13. Mancia G, Rea F, Cuspidi C, et al. Blood pressure control in hypertension. Pros and cons of available treatment strategies. *Journal of hypertension* 2017;**35**(2):225-33 doi: 10.1097/HJH.0000000000001181[published Online First: Epub Date]].
14. Werneck AO, Silva DR, Souza MF, et al. Correlates of Blood Pressure According to Early, On Time, and Late Maturation in Adolescents. *Journal of clinical hypertension* 2016;**18**(5):424-30 doi: 10.1111/jch.12699[published Online First: Epub Date]].
15. Widen E, Silventoinen K, Sovio U, et al. Pubertal timing and growth influences cardiometabolic risk factors in adult males and females. *Diabetes care* 2012;**35**(4):850-6 doi: 10.2337/dc11-1365[published Online First: Epub Date]].
16. Mueller NT, Duncan BB, Barreto SM, et al. Earlier age at menarche is associated with higher diabetes risk and cardiometabolic disease risk factors in Brazilian adults: Brazilian Longitudinal Study of Adult Health (ELSA-Brasil). *Cardiovasc Diabetol* 2014;**13**:22 doi: 10.1186/1475-2840-13-22[published Online First: Epub Date]].



17. Dreyfus J, Jacobs DR, Jr., Mueller N, et al. Age at Menarche and Cardiometabolic Risk in Adulthood: The Coronary Artery Risk Development in Young Adults Study. *J Pediatr* 2015;**167**(2):344-52 e1 doi: 10.1016/j.jpeds.2015.04.032[published Online First: Epub Date]].
18. Cao M, Cui B. Negative Effects of Age at Menarche on Risk of Cardiometabolic Diseases in Adulthood: A Mendelian Randomization Study. *The Journal of clinical endocrinology and metabolism* 2020;**105**(2) doi: 10.1210/clinem/dgz071[published Online First: Epub Date]].
19. Power C, Lake JK, Cole TJ. Body mass index and height from childhood to adulthood in the 1958 British born cohort. *The American journal of clinical nutrition* 1997;**66**(5):1094-101 doi: 10.1093/ajcn/66.5.1094[published Online First: Epub Date]].
20. Adair LS, Gordon-Larsen P. Maturation timing and overweight prevalence in US adolescent girls. *American journal of public health* 2001;**91**(4):642-4 doi: 10.2105/ajph.91.4.642[published Online First: Epub Date]].
21. Must A, Naumova EN, Phillips SM, et al. Childhood overweight and maturational timing in the development of adult overweight and fatness: the Newton Girls Study and its follow-up. *Pediatrics* 2005;**116**(3):620-7 doi: 10.1542/peds.2004-1604[published Online First: Epub Date]].
- [dataset] 22. Zhao Y, Hu Y, Smith JP, et al. Cohort profile: the China Health and Retirement Longitudinal Study (CHARLS). *International journal of epidemiology* 2014;**43**(1):61-8 doi: 10.1093/ije/dys203[published Online First: Epub Date]].
23. Li C, Liu T, Sun W, et al. Prevalence and risk factors of arthritis in a middle-aged and older Chinese population: the China health and retirement longitudinal study. *Rheumatology* 2015;**54**(4):697-706 doi: 10.1093/rheumatology/keu391[published Online First: Epub Date]].
24. Zhang L, Yang L, Wang C, et al. Individual and combined association analysis of famine exposure and serum uric acid with hypertension in the mid-aged and older adult: a population-based cross-sectional study. *BioMed research international* 2021;**21**(1):420 doi: 10.1155/2021/5594718  
10.1186/s12872-021-02230-z[published Online First: Epub Date]].
25. Zhang L, Yang L, Wang C, et al. Combined Effect of Famine Exposure and Obesity Parameters on Hypertension in the Midaged and Older Adult: A Population-Based Cross-Sectional Study. 2021;**2021**:5594718 doi: 10.1155/2021/5594718[published Online First: Epub Date]].
26. Zhang L, Li JL, Zhang LL, et al. Body mass index and serum uric acid level: Individual and combined effects on blood pressure in middle-aged and older individuals in China. *Medicine (Baltimore)* 2020;**99**(9):e19418 doi: 10.1097/MD.00000000000019418[published Online First: Epub Date]].
27. Zhang L, Li JL, Zhang LL, et al. Relationship between adiposity parameters and cognition: the "fat and jolly" hypothesis in middle-aged and elderly people in China. *Medicine* 2019;**98**(10) doi: ARTN e14747  
10.1097/MD.00000000000014747[published Online First: Epub Date]].
28. Zhang L, Li JL, Zhang LL, et al. Association and Interaction Analysis of Body Mass Index and Triglycerides Level with Blood Pressure in Elderly Individuals in China. *BioMed research international* 2018;**2018**:8934534 doi: 10.1155/2018/8934534[published Online First: Epub Date]].
29. Zhang L, Li JL, Zhang LL, et al. No association between C-reactive protein and depressive symptoms among the middle-aged and elderly in China Evidence from the China Health and Retirement Longitudinal Study. *Medicine* 2018;**97**(38) doi: ARTN e12352  
10.1097/MD.00000000000012352[published Online First: Epub Date]].
30. Zhang L, Liu K, Li H, et al. Relationship between body mass index and depressive symptoms: the "fat and jolly" hypothesis for the middle-aged and elderly in China. *BMC public health* 2016;**16**(1):1201 doi: 10.1186/s12889-016-3864-5[published Online First: Epub Date]].
31. Hayes AF, Preacher KJ. Quantifying and Testing Indirect Effects in Simple Mediation Models When the Constituent Paths Are Nonlinear. *Multivariate Behav Res* 2010;**45**(4):627-60 doi: 10.1080/00273171.2010.498290[published Online First: Epub Date]].



- 1 32. Hayes AF, Preacher KJ. Statistical mediation analysis with a multicategorical independent variable. *Br J Math Stat*  
2 *Psychol* 2014;**67**(3):451-70 doi: 10.1111/bmsp.12028[published Online First: Epub Date]].
- 3 33. Hayes AF. An Index and Test of Linear Moderated Mediation. *Multivariate Behav Res* 2015;**50**(1):1-22 doi:  
4 10.1080/00273171.2014.962683[published Online First: Epub Date]].
- 5 34. Shrestha A, Olsen J, Ramlau-Hansen CH, et al. Obesity and age at menarche. *Fertil Steril* 2011;**95**(8):2732-4 doi:  
6 10.1016/j.fertnstert.2011.02.020[published Online First: Epub Date]].
- 7 35. Bralic I, Tahirovic H, Matanic D, et al. Association of early menarche age and overweight/obesity. *J Pediatr Endocrinol*  
8 *Metab* 2012;**25**(1-2):57-62 doi: 10.1515/jpem-2011-0277[published Online First: Epub Date]].
- 9 36. Leitao RB, Rodrigues LP, Neves L, et al. Development of adiposity, obesity and age at menarche: an 8-year follow-up  
10 study in Portuguese schoolgirls. *International journal of adolescent medicine and health* 2013;**25**(1):55-63 doi:  
11 10.1515/ijamh-2013-0007[published Online First: Epub Date]].
- 12 37. Gallicchio L, Flaws JA, Smith RL. Age at menarche, androgen concentrations, and midlife obesity: findings from the  
13 Midlife Women's Health Study. *Menopause* 2016;**23**(11):1182-88 doi:  
14 10.1097/GME.0000000000000691[published Online First: Epub Date]].
- 15 38. Liu G, Yang Y, Huang W, et al. Association of age at menarche with obesity and hypertension among southwestern  
16 Chinese women: a new finding. *Menopause* 2018;**25**(5):546-53 doi:  
17 10.1097/GME.0000000000001027[published Online First: Epub Date]].
- 18 39. Zhou W, Wang T, Zhu L, et al. Association between Age at Menarche and Hypertension among Females in Southern  
19 China: A Cross-Sectional Study. *Int J Hypertens* 2019;**2019**:9473182 doi: 10.1155/2019/9473182[published  
20 Online First: Epub Date]].
- 21 40. Shen L, Wang L, Hu Y, et al. Associations of the ages at menarche and menopause with blood pressure and  
22 hypertension among middle-aged and older Chinese women: a cross-sectional analysis of the baseline data of  
23 the China Health and Retirement Longitudinal Study. *Hypertension research : official journal of the Japanese*  
24 *Society of Hypertension* 2019;**42**(5):730-38 doi: 10.1038/s41440-019-0235-5[published Online First: Epub  
25 Date]].
- 26 41. Guo L, Peng C, Xu H, et al. Age at menarche and prevention of hypertension through lifestyle in young Chinese adult  
27 women: result from project ELEFANT. *BMC Womens Health* 2018;**18**(1):182 doi: 10.1186/s12905-018-0677-  
28 y[published Online First: Epub Date]].
- 29 42. Stockl D, Meisinger C, Peters A, et al. Age at menarche and its association with the metabolic syndrome and its  
30 components: results from the KORA F4 study. *PloS one* 2011;**6**(10):e26076 doi:  
31 10.1371/journal.pone.0026076[published Online First: Epub Date]].
- 32 43. Chang CJ, Lai MM, Lin CC, et al. Age at menarche and its association with the metabolic syndrome in Taiwan. *Obesity*  
33 *research & clinical practice* 2016;**10 Suppl 1**:S26-S34 doi: 10.1016/j.orcp.2015.10.003[published Online First:  
34 Epub Date]].
- 35 44. Heys M, Schooling CM, Jiang C, et al. Age of menarche and the metabolic syndrome in China. *Epidemiology*  
36 *2007*;**18**(6):740-6 doi: 10.1097/EDE.0b013e3181567faf[published Online First: Epub Date]].
- 37 45. Yoo S, Hwang YS. Age-Group Related Cohort Effects on the Association between Age at Menarche and Metabolic  
38 Syndrome among Korean Premenopausal Women. *Korean journal of family medicine* 2019;**40**(4):280-81 doi:  
39 10.4082/kjfm.19.0045[published Online First: Epub Date]].
- 40 46. Akter S, Jesmin S, Islam M, et al. Association of age at menarche with metabolic syndrome and its components in  
41 rural Bangladeshi women. *Nutr Metab (Lond)* 2012;**9**(1):99 doi: 10.1186/1743-7075-9-99[published Online  
42 First: Epub Date]].
- 43 47. Glueck CJ, Morrison JA, Wang P, et al. Early and late menarche are associated with oligomenorrhea and predict  
44 metabolic syndrome 26 years later. *Metabolism: clinical and experimental* 2013;**62**(11):1597-606 doi:  
45 10.1016/j.metabol.2013.07.005[published Online First: Epub Date]].
- 46 48. Kim Y, Je Y. Early Menarche and Risk of Metabolic Syndrome: A Systematic Review and Meta-Analysis. *Journal of*  
47  
48  
49  
50  
51  
52  
53  
54  
55  
56  
57  
58  
59  
60

- women's health 2019;**28**(1):77-86 doi: 10.1089/jwh.2018.6998[published Online First: Epub Date]].
49. Farahmand M, Ramezani Tehrani F, Behboudi Gandevani S, et al. Is There any Association between Age at Menarche and Risk of Metabolic Syndrome? The Tehran Lipid & Glucose Study. *Arch Iran Med* 2019;**22**(9):495-500
50. Hwang YS, Park EJ, Choi JG, et al. Relationship between Age at Menarche and Metabolic Syndrome in Premenopausal Women: Korea National Health and Nutrition Examination Survey 2013-2014. *Korean journal of family medicine* 2018;**39**(5):300-06 doi: 10.4082/kjfm.17.0022[published Online First: Epub Date]].
51. Ahmed ML, Ong KK, Dunger DB. Childhood obesity and the timing of puberty. *Trends Endocrinol Metab* 2009;**20**(5):237-42 doi: 10.1016/j.tem.2009.02.004[published Online First: Epub Date]].
52. Jasik CB, Lustig RH. Adolescent obesity and puberty: the "perfect storm". *Ann N Y Acad Sci* 2008;**1135**:265-79 doi: 10.1196/annals.1429.009[published Online First: Epub Date]].
53. Garn SM. Continuities and changes in fatness from infancy through adulthood. *Curr Probl Pediatr* 1985;**15**(2):1-47 doi: 10.1016/0045-9380(85)90015-5[published Online First: Epub Date]].
54. van Lenthe FJ, Kemper CG, van Mechelen W. Rapid maturation in adolescence results in greater obesity in adulthood: the Amsterdam Growth and Health Study. *The American journal of clinical nutrition* 1996;**64**(1):18-24 doi: 10.1093/ajcn/64.1.18[published Online First: Epub Date]].
55. Remsberg KE, Demerath EW, Schubert CM, et al. Early menarche and the development of cardiovascular disease risk factors in adolescent girls: the Fels Longitudinal Study. *The Journal of clinical endocrinology and metabolism* 2005;**90**(5):2718-24 doi: 10.1210/jc.2004-1991[published Online First: Epub Date]].
56. Feng Y, Hong X, Wilker E, et al. Effects of age at menarche, reproductive years, and menopause on metabolic risk factors for cardiovascular diseases. *Atherosclerosis* 2008;**196**(2):590-7 doi: 10.1016/j.atherosclerosis.2007.06.016[published Online First: Epub Date]].
57. Won JC, Hong JW, Noh JH, et al. Association Between Age at Menarche and Risk Factors for Cardiovascular Diseases in Korean Women: The 2010 to 2013 Korea National Health and Nutrition Examination Survey. *Medicine (Baltimore)* 2016;**95**(18):e3580 doi: 10.1097/MD.0000000000003580[published Online First: Epub Date]].
58. Au Yeung SL, Jiang C, Cheng KK, et al. Age at menarche and cardiovascular risk factors using Mendelian randomization in the Guangzhou Biobank Cohort Study. *Preventive medicine* 2017;**101**:142-48 doi: 10.1016/j.ypmed.2017.06.006[published Online First: Epub Date]].
59. Ley SH, Li Y, Tobias DK, et al. Duration of Reproductive Life Span, Age at Menarche, and Age at Menopause Are Associated With Risk of Cardiovascular Disease in Women. *J Am Heart Assoc* 2017;**6**(11) doi: 10.1161/JAHA.117.006713[published Online First: Epub Date]].
60. Luijken J, van der Schouw YT, Mensink D, et al. Association between age at menarche and cardiovascular disease: A systematic review on risk and potential mechanisms. *Maturitas* 2017;**104**:96-116 doi: 10.1016/j.maturitas.2017.07.009[published Online First: Epub Date]].
61. Yang L, Li L, Millwood IY, et al. Age at menarche and risk of major cardiovascular diseases: Evidence of birth cohort effects from a prospective study of 300,000 Chinese women. *International journal of cardiology* 2017;**227**:497-502 doi: 10.1016/j.ijcard.2016.10.115[published Online First: Epub Date]].
62. Chen X, Liu Y, Sun X, et al. Age at menarche and risk of all-cause and cardiovascular mortality: a systematic review and dose-response meta-analysis. *Menopause* 2018;**26**(6):670-76 doi: 10.1097/GME.0000000000001289[published Online First: Epub Date]].
63. Lee JJ, Cook-Wiens G, Johnson BD, et al. Age at Menarche and Risk of Cardiovascular Disease Outcomes: Findings From the National Heart Lung and Blood Institute-Sponsored Women's Ischemia Syndrome Evaluation. *J Am Heart Assoc* 2019;**8**(12):e012406 doi: 10.1161/JAHA.119.012406[published Online First: Epub Date]].
64. Zhang L, Li Y, Zhou W, et al. Mediation effect of BMI on the relationship between age at menarche and hypertension: The Henan Rural Cohort Study. *Journal of human hypertension* 2019 doi: 10.1038/s41371-019-0247-2[published Online First: Epub Date]].
65. Werneck AO, Oyeyemi AL, Cyrino ES, et al. Association between age at menarche and blood pressure in adulthood:

- 1 is obesity an important mediator? Hypertension research : official journal of the Japanese Society of  
2 Hypertension 2018;**41**(10):856-64 doi: 10.1038/s41440-018-0079-4[published Online First: Epub Date]].
- 3  
4 66. Lakshman R, Forouhi NG, Sharp SJ, et al. Early age at menarche associated with cardiovascular disease and mortality.  
5 The Journal of clinical endocrinology and metabolism 2009;**94**(12):4953-60 doi: 10.1210/jc.2009-  
6 1789[published Online First: Epub Date]].
- 7  
8 67. Charalampopoulos D, McLoughlin A, Elks CE, et al. Age at menarche and risks of all-cause and cardiovascular death:  
9 a systematic review and meta-analysis. American journal of epidemiology 2014;**180**(1):29-40 doi:  
10 10.1093/aje/kwu113[published Online First: Epub Date]].
- 11  
12 68. Zheng Y, Zhang G, Chen Z, et al. Association between Age at Menarche and Cardiovascular Disease Risk Factors in  
13 China: A Large Population-Based Investigation. Cardiorenal Med 2016;**6**(4):307-16 doi:  
14 10.1159/000445506[published Online First: Epub Date]].
- 15  
16  
17  
18  
19  
20  
21  
22  
23  
24  
25  
26  
27  
28  
29  
30  
31  
32  
33  
34  
35  
36  
37  
38  
39  
40  
41  
42  
43  
44  
45  
46  
47  
48  
49  
50  
51  
52  
53  
54  
55  
56  
57  
58  
59  
60

For peer review only

1  
2  
3  
4  
5  
6  
7  
8  
9  
10  
11  
12  
13  
14  
15  
16  
17  
18  
19  
20  
21  
22  
23  
24  
25  
26  
27  
28  
29  
30  
31  
32  
33  
34  
35  
36  
37  
38  
39  
40  
41  
42  
43  
44  
45  
46  
47  
48  
49  
50  
51  
52  
53  
54  
55  
56  
57  
58  
59  
60

Fig. 1 Selection of participants

For peer review only

1  
2  
3  
4  
5  
6  
7  
8  
9  
10  
11  
12  
13  
14  
15  
16  
17  
18  
19  
20  
21  
22  
23  
24  
25  
26  
27  
28  
29  
30  
31  
32  
33  
34  
35  
36  
37  
38  
39  
40  
41  
42  
43  
44  
45  
46  
47  
48  
49  
50  
51  
52  
53  
54  
55  
56  
57  
58  
59  
60



90x90mm (300 x 300 DPI)

**STROBE 2007 (v4) Statement—Checklist of items that should be included in reports of *cross-sectional studies***

| Section/Topic                | Item # | Recommendation                                                                                                                                                                       | Reported on page # |
|------------------------------|--------|--------------------------------------------------------------------------------------------------------------------------------------------------------------------------------------|--------------------|
| <b>Title and abstract</b>    | 1      | (a) Indicate the study's design with a commonly used term in the title or the abstract                                                                                               | 1                  |
|                              |        | (b) Provide in the abstract an informative and balanced summary of what was done and what was found                                                                                  | 2-3                |
| <b>Introduction</b>          |        |                                                                                                                                                                                      |                    |
| Background/rationale         | 2      | Explain the scientific background and rationale for the investigation being reported                                                                                                 | 4-5                |
| Objectives                   | 3      | State specific objectives, including any prespecified hypotheses                                                                                                                     | 5                  |
| <b>Methods</b>               |        |                                                                                                                                                                                      |                    |
| Study design                 | 4      | Present key elements of study design early in the paper                                                                                                                              | 6                  |
| Setting                      | 5      | Describe the setting, locations, and relevant dates, including periods of recruitment, exposure, follow-up, and data collection                                                      | 6                  |
| Participants                 | 6      | (a) Give the eligibility criteria, and the sources and methods of selection of participants                                                                                          | 7                  |
| Variables                    | 7      | Clearly define all outcomes, exposures, predictors, potential confounders, and effect modifiers. Give diagnostic criteria, if applicable                                             | 7-8                |
| Data sources/<br>measurement | 8*     | For each variable of interest, give sources of data and details of methods of assessment (measurement). Describe comparability of assessment methods if there is more than one group | 8                  |
| Bias                         | 9      | Describe any efforts to address potential sources of bias                                                                                                                            | 8                  |
| Study size                   | 10     | Explain how the study size was arrived at                                                                                                                                            | 7                  |
| Quantitative variables       | 11     | Explain how quantitative variables were handled in the analyses. If applicable, describe which groupings were chosen and why                                                         | 7                  |
| Statistical methods          | 12     | (a) Describe all statistical methods, including those used to control for confounding                                                                                                | 7-8                |
|                              |        | (b) Describe any methods used to examine subgroups and interactions                                                                                                                  | 7-8                |
|                              |        | (c) Explain how missing data were addressed                                                                                                                                          | 7-8                |
|                              |        | (d) If applicable, describe analytical methods taking account of sampling strategy                                                                                                   | 7-8                |
|                              |        | (e) Describe any sensitivity analyses                                                                                                                                                | 7-8                |
| <b>Results</b>               |        |                                                                                                                                                                                      |                    |

|                          |     |                                                                                                                                                                                                              |       |
|--------------------------|-----|--------------------------------------------------------------------------------------------------------------------------------------------------------------------------------------------------------------|-------|
| Participants             | 13* | (a) Report numbers of individuals at each stage of study—eg numbers potentially eligible, examined for eligibility, confirmed eligible, included in the study, completing follow-up, and analysed            | 9-10  |
|                          |     | (b) Give reasons for non-participation at each stage                                                                                                                                                         | 9-10  |
|                          |     | (c) Consider use of a flow diagram                                                                                                                                                                           | 9-10  |
| Descriptive data         | 14* | (a) Give characteristics of study participants (eg demographic, clinical, social) and information on exposures and potential confounders                                                                     | 10-13 |
|                          |     | (b) Indicate number of participants with missing data for each variable of interest                                                                                                                          | 10-13 |
| Outcome data             | 15* | Report numbers of outcome events or summary measures                                                                                                                                                         | 10-13 |
| Main results             | 16  | (a) Give unadjusted estimates and, if applicable, confounder-adjusted estimates and their precision (eg, 95% confidence interval). Make clear which confounders were adjusted for and why they were included | 13-16 |
|                          |     | (b) Report category boundaries when continuous variables were categorized                                                                                                                                    | 13-16 |
|                          |     | (c) If relevant, consider translating estimates of relative risk into absolute risk for a meaningful time period                                                                                             | 13-16 |
| Other analyses           | 17  | Report other analyses done—eg analyses of subgroups and interactions, and sensitivity analyses                                                                                                               |       |
| <b>Discussion</b>        |     |                                                                                                                                                                                                              |       |
| Key results              | 18  | Summarise key results with reference to study objectives                                                                                                                                                     | 17-19 |
| Limitations              | 19  | Discuss limitations of the study, taking into account sources of potential bias or imprecision. Discuss both direction and magnitude of any potential bias                                                   | 17-19 |
| Interpretation           | 20  | Give a cautious overall interpretation of results considering objectives, limitations, multiplicity of analyses, results from similar studies, and other relevant evidence                                   | 17-19 |
| Generalisability         | 21  | Discuss the generalisability (external validity) of the study results                                                                                                                                        | 17-19 |
| <b>Other information</b> |     |                                                                                                                                                                                                              |       |
| Funding                  | 22  | Give the source of funding and the role of the funders for the present study and, if applicable, for the original study on which the present article is based                                                | 20    |

\*Give information separately for cases and controls in case-control studies and, if applicable, for exposed and unexposed groups in cohort and cross-sectional studies.

**Note:** An Explanation and Elaboration article discusses each checklist item and gives methodological background and published examples of transparent reporting. The STROBE checklist is best used in conjunction with this article (freely available on the Web sites of PLoS Medicine at <http://www.plosmedicine.org/>, Annals of Internal Medicine at <http://www.annals.org/>, and Epidemiology at <http://www.epidem.com/>). Information on the STROBE Initiative is available at [www.strobe-statement.org](http://www.strobe-statement.org).
